# Supplementary material for: A green approach to encapsulate proteins and enzymes within crystalline lanthanide-based Tb and Gd MOFs
Source: Royal Society of Chemistry journal article supplement (doi:10.1039/d4dt01667j), 2024-01-01
Supplement: d4dt01667j1.xlsx [file d4dt01667j1.xlsx]

## Sheet: Fluorescence spectra
Wavelength	LC@TbBTC em	BSA@TbBTC em	TbBTC em	Wavelength	LC@TbBTC ex	TbBTC ex	BSA@TbBTC ex
400	0	322470	818260	290	5306.9	800410	302160
401	2145	325580	829500	291	2531.1	792900	300000
402	-1170	321130	821350	292	-174.65	792700	304690
403	-5295	302620	800000	293	1319.6	800000	314440
404	-8500	294230	784110	294	4063.8	812470	322860
405	-6045	295380	781620	295	7638.1	829040	340200
406	-4570	298250	790550	296	14282	859940	365700
407	1925	297320	791670	297	22767	896250	386730
408	4640	292630	795580	298	34181	938350	423950
409	-885	289620	800000	299	45385	991750	465950
410	-1770	294240	805110	300	65999	1051000	507740
411	-2545	298440	811640	301	84364	1113600	555570
412	-2650	295640	806940	302	101090	1187400	614710
413	-4195	288710	800000	303	122690	1260600	665770
414	-1900	285310	803070	304	138060	1332200	721080
415	-935	285170	801160	305	156290	1403500	775730
416	0	286770	798150	306	173460	1472300	819850
417	2462.6	289080	798270	307	187340	1532100	863060
418	1495.3	290520	793090	308	198130	1579600	899070
419	-942.11	289940	800140	309	206690	1620600	920150
420	820.53	288490	795590	310	212590	1636400	929480
421	913.16	288290	795050	311	217530	1637300	921740
422	185.79	288670	800000	312	217830	1607500	908070
423	-1011.6	289740	795470	313	211730	1556200	875590
424	-2488.9	290140	795710	314	206170	1485900	829830
425	-1836.3	290680	796220	315	198070	1415200	777840
426	-2363.7	292050	800140	316	187570	1333200	721980
427	68.947	295720	803630	317	186430	1257400	672030
428	1691.6	297840	802380	318	179840	1180800	612010
429	2924.2	298290	800850	319	173760	1095500	547790
430	-273.16	298400	802710	320	172340	1024400	495810
431	-2020.5	300190	800210	321	168480	972090	454720
432	-237.89	301050	800570	322	166970	927900	417890
433	-2485.3	300960	800000	323	164440	901390	392010
434	817.37	301060	799920	324	164520	883530	375940
435	0	303480	801030	325	164590	875340	374420
436	-1218.1	306460	802870	326	164270	866900	359210
437	793.89	307840	804240	327	162550	851440	345290
438	2255.8	306800	805120	328	162310	832810	327880
439	2217.8	305780	799240	329	164500	827450	318940
440	3279.7	305660	795240	330	161440	821150	311020
441	1881.7	306140	799970	331	163360	812600	306980
442	6063.6	306290	799930	332	161750	813470	298240
443	7445.6	305540	803200	333	160140	819090	297520
444	5377.5	305940	800000	334	168670	847260	301240
445	6949.4	307260	797780	335	172030	882700	332670
446	8121.4	307420	798320	336	172810	871850	315450
447	7463.3	306760	792790	337	165420	842490	300000
448	12205	311430	797120	338	163810	831850	307060
449	9477.2	316740	808070	339	159520	839010	322630
450	13599	315860	805690	340	160460	845830	330680
451	9691.1	310720	802660	341	157500	846240	337260
452	12483	307020	798640	342	155140	835810	331560
453	11225	305050	794650	343	154830	817790	316670
454	8266.9	303210	793620	344	150050	805830	314480
455	7578.9	303970	795210	345	148500	796420	312240
456	8820.8	305070	796210	346	149190	796130	308320
457	10063	305870	801280	347	142200	800510	312660
458	10905	303200	798640	348	139930	816690	319770
459	8136.7	301590	800000	349	143810	856960	347780
460	8128.6	304710	798730	350	143570	901760	395470
461	10871	309350	800620	351	139920	911290	389860
462	9932.5	310350	800970	352	142730	900880	372660
463	9584.4	307140	792220	353	135970	881460	356870
464	6596.4	307760	787830	354	131290	868000	347720
465	7558.3	313760	792330	355	126790	840850	320340
466	12000	320750	800000	356	121600	821440	299400
467	12682	321120	806900	357	119890	822520	300000
468	10344	315320	799500	358	115250	841950	329900
469	6376.1	309130	793330	359	114630	853400	345450
470	338.06	306530	791920	360	110180	835920	326650
471	0	308900	794340	361	102120	811690	309650
472	3028.3	309620	801980	362	94143	799570	302910
473	1986.7	305650	800000	363	90187	800000	305230
474	1535	300410	795030	364	84631	806960	308340
475	393.33	298710	788870	365	84105	820010	319070
476	-1258.3	298470	790280	366	81190	843130	334670
477	0	299250	789270	367	84704	882830	368040
478	2492.3	301990	792170	368	87888	927570	416070
479	6484.6	306980	799050	369	83812	942020	434180
480	12497	313890	802930	370	74827	897080	381740
481	17219	323380	810760	371	65761	841680	330080
482	30082	341170	820210	372	56915	813330	309370
483	46764	368150	836690	373	53499	800000	300000
484	70676	416100	867710	374	49314	806760	309040
485	110770	520940	930740	375	45718	828230	323440
486	160990	693020	1053400	376	46312	857460	353010
487	214070	842270	1175000	377	48466	886050	382800
488	238240	870380	1214200	378	46811	894750	382410
489	223040	793190	1161000	379	42895	882660	364740
490	190420	684270	1087500	380	32909	862430	355860
491	155970	581520	1015800	381	27713	839870	332640
492	121540	493610	944240	382	22478	818670	312200
493	96837	435940	895740	383	14382	806250	303700
494	75569	400120	869720	384	10616	801240	299400
495	60651	374820	853900	385	4440.4	800000	300000
496	48914	360320	846750	386	-945.37	797620	298710
497	39716	357970	852800	387	-430.87	799040	300050
498	32308	353930	856240	388	-2016.9	800690	298710
499	24691	339400	848350	389	887.13	798210	300000
500	18703	320370	829790	390	1641.1	797990	296970
501	12385	308060	812930	391	705.13	799000	299020
502	8377.6	302880	803510	392	2649.1	798570	298380
503	6979.9	302290	801610	393	2983.1	798350	298360
504	4502.2	301210	800000	394	5917.1	799000	298130
505	4034.5	300100	801010	395	7001.1	798750	299190
506	4796.8	299310	798850	396	12795	799250	299670
507	1799.1	300040	800780	397	12559	800000	298290
508	3461.4	299320	800060	398	12243	800130	299760
509	2740.9	298260	800140	399	8477.1	800560	296380
510	3830.4	297020	798750	400	691.13	799780	299080
511	3419.9	296890	798870	401	-1404.9	800220	299900
512	1959.4	296390	800450	402	-1300.9	802920	298880
513	3638.9	295190	799560	403	-2706.9	815560	299860
514	4818.4	294470	796140	404	-262.87	829940	311360
515	2897.8	294500	797430	405	3241.1	828730	312980
516	3457.3	294480	796060	406	355.13	815380	299040
517	4486.8	294240	798140	407	-1190.9	803240	298960
518	3686.3	295150	799030	408	-466.87	804160	300040
519	4105.8	295350	797180	409	-1612.9	803600	298140
520	3886.9	293550	798810	410	1081.1	803360	299450
521	4430	291430	798580	411	3255.1	804240	300000
522	3333.1	291990	796780	412	3476.5	805250	299330
523	2726.2	293980	795560	413	-150.36	803460	299130
524	2639.3	294980	798210	414	-1227.2	802660	299300
525	2832.4	294620	800110	415	1205.9	801310	297620
526	3815.4	294480	799480	416	-2371	802950	299640
527	2288.5	294200	798340	417	-1667.9	801200	298960
528	3501.6	292930	797110	418	2805.2	799270	298050
529	2886.9	292190	798540	419	6298.3	799220	300070
530	2644.1	293820	800000	420	5031.4	800000	300630
531	3281.2	295800	801240	421	134.5	799590	300000
532	4498.3	298620	802840	422	747.61	799750	297780
533	6255.5	301550	804210	423	-559.28	799450	299190
534	6292.6	306580	806680	424	-506.17	798570	299890
535	12260	312830	812560	425	-243.07	798380	298670
536	21617	324420	823160	426	3650	800230	299510
537	41824	374590	856990	427	1863.1	797810	299070
538	99601	552720	960490	428	1786.3	798710	299520
539	221680	884660	1167300	429	659.36	800000	300090
540	391250	1233400	1419800	430	1412.5	801620	299520
541	538620	1454600	1601800	431	3195.6	799330	300000
542	604780	1544100	1670000	432	5228.7	799830	300440
543	619270	1567700	1694500	433	3181.8	800370	300690
544	609710	1511500	1657900	434	5744.9	799390	299920
545	559000	1304000	1540100	435	7298	800460	299030
546	455500	991120	1331000	436	10521	799970	300410
547	342760	705290	1120900	437	16954	800060	300170
548	244120	539630	987880	438	16147	800000	300210
549	170350	452880	916860	439	15610	800420	301010
550	116360	402180	877400	440	14524	800050	299980
551	75454	368260	853540	441	14857	800720	300000
552	47871	344350	834250	442	14970	799850	301730
553	30488	328080	822450	443	12923	800270	301680
554	19735	317510	815080	444	14406	801590	300980
555	11642	309580	807920	445	15609	799890	301670
556	5335.5	305250	803830	446	11752	801070	301940
557	4181.4	303070	802430	447	14565	800000	299800
558	2342.2	302100	803040	448	19848	796930	300180
559	2868	300710	802400	449	40452	797650	299630
560	1968.9	300000	800140	450	55195	796890	299670
561	989.68	298940	800760	451	47538	797650	300000
562	-354.5	298220	800400	452	43261	798500	301330
563	-638.67	297060	800340	453	38904	799310	301700
564	-1207.8	295990	797610	454	28137	800470	300850
565	-987.02	296010	798390	455	28020	799980	300430
566	-1506.2	296420	798040	456	37423	800000	301830
567	-615.37	296540	800350	457	42446	799030	300510
568	-1419.5	295350	799340	458	48949	799840	300990
569	-1213.7	295340	800000	459	45963	799530	299160
570	-1117.9	295820	800450	460	42326	797090	300430
571	562.94	296970	801990	461	60729	798170	300000
572	-396.24	298050	803280	462	79172	797440	298910
573	-95.413	299330	804150	463	84825	798720	300120
574	-209.59	300130	804300	464	69148	797320	299450
575	1446.2	299770	803980	465	62831	796720	300020
576	2463	301260	805130	466	93794	796450	300360
577	5215.1	307480	807730	467	139250	796440	299090
578	13897	319910	817540	468	137350	796870	297940
579	24644	343280	831140	469	100620	796780	299930
580	40356	383860	858480	470	68087	798010	300460
581	57424	440610	901610	471	54200	797820	300970
582	73391	478190	939460	472	62163	795580	297080
583	78298	464340	938770	473	68796	796090	298140
584	66015	419220	898790	474	49889	797000	299230
585	54392	388760	867520	475	22392	798710	300650
586	49719	376610	859290	476	17785	798690	299680
587	44156	359520	845280	477	13379	800470	299180
588	36028	337960	828180	478	14502	800550	300420
589	27931	323630	814690	479	26595	800000	299220
590	21128	316130	809860	480	40468	799790	299430
591	16630	310760	805480	481	47391	800330	300720
592	13442	307050	804740	482	44554	802520	302980
593	10904	305150	802110	483	41067	805660	304060
594	7831.2	304830	800440	484	36950	808580	307440
595	6203.3	304960	800000	485	30523	815840	312810
596	4740.4	304500	798910	486	30196	824870	320830
597	5312.5	306470	800000	487	31850	834480	332320
598	6064.6	306760	796480	488	31103	836290	331750
599	8136.8	303510	800000	489	31186	829180	321410
600	10499	298610	802220	490	33009	819480	314130
601	11341	299890	804960	491	38432	811390	306420
602	11213	299200	810910	492	38715	806730	303680
603	7980.3	295970	806980	493	27828	806020	302240
604	5047.4	296090	803560	494	14261	805000	301040
605	4669.5	300250	794390	495	894.46	806320	301400
606	4641.6	302590	792910	496	287.57	806210	301580
607	3993.7	302380	795810	497	-2039.3	806040	301160
608	4480.9	302170	798340	498	323.78	808370	301300
609	5768	301030	797220	499	-2203.1	809160	299910
610	5495.1	299820	797170	500	0	814910	300000
611	5928.2	299450	795020
612	5840.4	299180	795750
613	7017.6	300590	794940
614	8469.8	302840	796510
615	11192	308670	800000
616	16974	323160	809940
617	27876	350750	827520
618	39904	381920	849240
619	48556	394470	864810
620	48358	377100	855870
621	40075	344130	830370
622	28132	319090	811480
623	18620	307790	802270
624	14142	303340	797930
625	8719.1	300880	798350
626	6206.3	300340	797130
627	6203.5	300260	797710
628	5915.8	299670	799220
629	4728	299210	799390
630	4440.2	299610	800840
631	4312.4	299340	800550
632	4564.6	298770	800000
633	4211.8	298560	799240
634	4504	298880	800840
635	5336.2	299290	799840
636	4698.4	299830	798800
637	4750.6	299950	799400
638	4872.8	300210	798280
639	5230	300640	797990
640	5496.5	301300	796950
641	6255.1	302100	797940
642	6953.6	303440	798830
643	8317.1	305720	798430
644	8315.7	307630	800000
645	8094.2	308410	803270
646	8382.8	308610	803520
647	8431.3	309100	802870
648	8634.9	307970	802910
649	7413.4	304800	801310
650	6771.9	302550	798340
651	6570.5	302080	797480
652	5899	302220	798300
653	5417.6	301900	797670
654	5191.1	301290	798180
655	5089.7	300870	799170
656	4903.2	300850	799780
657	5211.8	300880	799850
658	4140.3	300830	800000
659	3943.8	301220	799280
660	4572.4	301370	800750
661	4115.9	301330	800630
662	3619.5	301750	802520
663	4628	303040	802760
664	4011.6	304290	804160
665	4740.1	305410	805310
666	4448.6	305530	805040
667	5422.2	304630	806130
668	4620.7	303980	804170
669	4434.3	304550	808540
670	4537.8	306850	809970
671	5326.4	308250	814800
672	4204.9	307840	813410
673	4275.4	305110	810670
674	4563.3	303100	808500
675	4351.2	302880	807420
676	4604.2	304140	806010
677	4652.1	304390	808400
678	4835	303410	806520
679	4577.9	301610	806740
680	4455.8	300430	805260
681	4908.8	299580	803300
682	3946.7	299620	802360
683	4499.6	299720	801260
684	4262.5	299870	800520
685	5475.4	299380	798930
686	4623.4	299100	797970
687	5326.3	298850	798800
688	6109.2	299490	798950
689	5897.1	299400	799880
690	6370	298750	798360
691	6872.9	297280	796500
692	7435.9	297330	797440
693	6733.2	298390	789070
694	6069.2	299660	788440
695	6465.2	299490	800000
696	8961.1	302640	800000
697	8687.1	303000	808760
698	8403.1	304730	800000
699	5684	307160	805060
700	0	310170	800000

## Sheet: WAXS 
2Q (°)	LC@TbBTC	2Q (°)	TbBTC	2Q (°)	BSA@TbBTC	2Q (°)	LC@GdBTC	2Q (°)	BSA@GdBTC	2Q (°)	GdBTC
5.004	0.071839	5.0223	0.011023	5.0223	0.035624	5.004	0.12074	5.0223	0.08	5.0223	0.026569
5.0588	0.071961	5.076	0.010254	5.076	0.037681	5.0588	0.11981	5.076	0.0799	5.076	0.028475
5.1135	0.072075	5.1298	0.010593	5.1298	0.036598	5.1135	0.1171	5.1298	0.0799	5.1298	0.027425
5.1682	0.072181	5.1835	0.010768	5.1835	0.036688	5.1682	0.12022	5.1835	0.0799	5.1835	0.026957
5.2229	0.072279	5.2373	0.011057	5.2373	0.036381	5.2229	0.11959	5.2373	0.0798	5.2373	0.02698
5.2777	0.07237	5.291	0.011211	5.291	0.036414	5.2777	0.12036	5.291	0.0798	5.291	0.027188
5.3324	0.072452	5.3448	0.010909	5.3448	0.037277	5.3324	0.12068	5.3448	0.0798	5.3448	0.026258
5.3871	0.072527	5.3985	0.011408	5.3985	0.036604	5.3871	0.12043	5.3985	0.0797	5.3985	0.026246
5.4419	0.072594	5.4523	0.01063	5.4523	0.037242	5.4419	0.11865	5.4523	0.0797	5.4523	0.027069
5.4966	0.072653	5.5061	0.011483	5.5061	0.035919	5.4966	0.11658	5.5061	0.0797	5.5061	0.026933
5.5513	0.072704	5.5598	0.01109	5.5598	0.035921	5.5513	0.11702	5.5598	0.0797	5.5598	0.026441
5.6061	0.072608	5.6136	0.010425	5.6136	0.036752	5.6061	0.11842	5.6136	0.0797	5.6136	0.026513
5.6608	0.072754	5.6674	0.010416	5.6674	0.03628	5.6608	0.11914	5.6674	0.0798	5.6674	0.025527
5.7155	0.072539	5.7211	0.010055	5.7211	0.036926	5.7155	0.11883	5.7211	0.0798	5.7211	0.026249
5.7703	0.072361	5.7749	0.010103	5.7749	0.034835	5.7703	0.11758	5.7749	0.0798	5.7749	0.02565
5.825	0.072603	5.8286	0.010396	5.8286	0.037152	5.825	0.11933	5.8286	0.0799	5.8286	0.026979
5.8798	0.072656	5.8824	0.010025	5.8824	0.037158	5.8798	0.11868	5.8824	0.08	5.8824	0.026455
5.9345	0.072515	5.9362	0.010569	5.9362	0.035929	5.9345	0.12061	5.9362	0.0799	5.9362	0.026127
5.9893	0.072486	5.99	0.010242	5.99	0.036683	5.9893	0.11955	5.99	0.0798	5.99	0.026048
6.044	0.072931	6.0437	0.010201	6.0437	0.036417	6.044	0.11837	6.0437	0.0798	6.0437	0.02523
6.0988	0.072517	6.0975	0.010772	6.0975	0.036039	6.0988	0.11895	6.0975	0.0797	6.0975	0.024907
6.1535	0.07265	6.1513	0.010942	6.1513	0.036656	6.1535	0.12051	6.1513	0.0796	6.1513	0.024677
6.2083	0.072295	6.205	0.01021	6.205	0.036466	6.2083	0.11855	6.205	0.0794	6.205	0.02636
6.263	0.07185	6.2588	0.010468	6.2588	0.03599	6.263	0.11854	6.2588	0.0794	6.2588	0.025259
6.3178	0.071624	6.3126	0.010036	6.3126	0.036527	6.3178	0.12008	6.3126	0.0793	6.3126	0.026434
6.3725	0.071722	6.3664	0.010587	6.3664	0.035617	6.3725	0.11741	6.3664	0.0793	6.3664	0.024541
6.4273	0.07198	6.4202	0.011206	6.4202	0.035026	6.4273	0.11895	6.4202	0.0793	6.4202	0.025279
6.482	0.072195	6.4739	0.011296	6.4739	0.036296	6.482	0.1183	6.4739	0.0793	6.4739	0.025372
6.5368	0.072259	6.5277	0.010269	6.5277	0.03666	6.5368	0.11915	6.5277	0.0794	6.5277	0.025677
6.5916	0.072734	6.5815	0.010674	6.5815	0.037004	6.5916	0.11893	6.5815	0.0794	6.5815	0.024764
6.6463	0.072955	6.6353	0.010866	6.6353	0.036273	6.6463	0.11784	6.6353	0.0796	6.6353	0.025542
6.7011	0.07313	6.6891	0.009949	6.6891	0.036837	6.7011	0.11917	6.6891	0.0797	6.6891	0.026544
6.7558	0.07339	6.7429	0.010502	6.7429	0.036445	6.7558	0.1195	6.7429	0.0799	6.7429	0.02556
6.8106	0.07368	6.7967	0.0096345	6.7967	0.03629	6.8106	0.1201	6.7967	0.08	6.7967	0.026608
6.8654	0.07397	6.8504	0.0094881	6.8504	0.036784	6.8654	0.11822	6.8504	0.0802	6.8504	0.026312
6.9201	0.07457	6.9043	0.0098896	6.9043	0.03594	6.9201	0.11877	6.9043	0.0803	6.9043	0.02443
6.9749	0.07479	6.958	0.010422	6.958	0.036168	6.9749	0.11854	6.958	0.0804	6.958	0.02555
7.0297	0.07492	7.0118	0.0096518	7.0118	0.036513	7.0297	0.11895	7.0118	0.0804	7.0118	0.024783
7.0845	0.07517	7.0656	0.0099152	7.0656	0.035705	7.0845	0.11811	7.0656	0.0804	7.0656	0.02565
7.1392	0.0753	7.1194	0.010472	7.1194	0.035633	7.1392	0.12025	7.1194	0.0803	7.1194	0.02514
7.194	0.07452	7.1732	0.010164	7.1732	0.035849	7.194	0.11986	7.1732	0.08	7.1732	0.024593
7.2488	0.07461	7.2271	0.01046	7.2271	0.036161	7.2488	0.11713	7.2271	0.0798	7.2271	0.024378
7.3036	0.07433	7.2809	0.010823	7.2809	0.035988	7.3036	0.11722	7.2809	0.0798	7.2809	0.025757
7.3584	0.07389	7.3347	0.010279	7.3347	0.036454	7.3584	0.11981	7.3347	0.0799	7.3347	0.023821
7.4132	0.07405	7.3885	0.010251	7.3885	0.035866	7.4132	0.11919	7.3885	0.0799	7.3885	0.024465
7.4679	0.07403	7.4423	0.009735	7.4423	0.036324	7.4679	0.11755	7.4423	0.08	7.4423	0.024507
7.5227	0.07422	7.4961	0.010161	7.4961	0.034983	7.5227	0.11962	7.4961	0.0801	7.4961	0.025227
7.5775	0.07404	7.5499	0.010049	7.5499	0.035843	7.5775	0.1187	7.5499	0.0801	7.5499	0.02629
7.6323	0.07341	7.6037	0.010795	7.6037	0.035774	7.6323	0.11749	7.6037	0.08	7.6037	0.025846
7.6871	0.07307	7.6575	0.010181	7.6575	0.035231	7.6871	0.11734	7.6575	0.0799	7.6575	0.02513
7.7419	0.07247	7.7113	0.0096747	7.7113	0.036895	7.7419	0.1177	7.7113	0.08	7.7113	0.026632
7.7967	0.072242	7.7652	0.010069	7.7652	0.035722	7.7967	0.11997	7.7652	0.0801	7.7652	0.025988
7.8515	0.072373	7.819	0.010209	7.819	0.03598	7.8515	0.11683	7.819	0.08	7.819	0.025687
7.9063	0.072357	7.8728	0.010534	7.8728	0.036236	7.9063	0.11673	7.8728	0.08	7.8728	0.025497
7.9611	0.07244	7.9266	0.010309	7.9266	0.035418	7.9611	0.11925	7.9266	0.0799	7.9266	0.025918
8.0159	0.07275	7.9805	0.010879	7.9805	0.035578	8.0159	0.11656	7.9805	0.0797	7.9805	0.025709
8.0707	0.072808	8.0343	0.010126	8.0343	0.03595	8.0707	0.11731	8.0343	0.0797	8.0343	0.026054
8.1255	0.07305	8.0881	0.010219	8.0881	0.036852	8.1255	0.11911	8.0881	0.0795	8.0881	0.025151
8.1803	0.07314	8.142	0.010072	8.142	0.035953	8.1803	0.11866	8.142	0.0792	8.142	0.026407
8.2352	0.07304	8.1958	0.0097904	8.1958	0.035786	8.2352	0.11815	8.1958	0.0791	8.1958	0.02511
8.29	0.072878	8.2496	0.0098236	8.2496	0.035482	8.29	0.1178	8.2496	0.0789	8.2496	0.024333
8.3448	0.07281	8.3035	0.0099528	8.3035	0.035846	8.3448	0.117	8.3035	0.0787	8.3035	0.026893
8.3996	0.072577	8.3573	0.010145	8.3573	0.035778	8.3996	0.11883	8.3573	0.0788	8.3573	0.024464
8.4544	0.072643	8.4111	0.0098718	8.4111	0.036166	8.4544	0.11697	8.4111	0.0789	8.4111	0.026499
8.5092	0.072667	8.465	0.010333	8.465	0.036553	8.5092	0.11803	8.465	0.079	8.465	0.025909
8.5641	0.072804	8.5188	0.010148	8.5188	0.036059	8.5641	0.11674	8.5188	0.0791	8.5188	0.024493
8.6189	0.072709	8.5727	0.010316	8.5727	0.036667	8.6189	0.11923	8.5727	0.0792	8.5727	0.024703
8.6737	0.072198	8.6265	0.010154	8.6265	0.03547	8.6737	0.1182	8.6265	0.0793	8.6265	0.025347
8.7285	0.072087	8.6804	0.010052	8.6804	0.036098	8.7285	0.11701	8.6804	0.0794	8.6804	0.025428
8.7834	0.071938	8.7342	0.010428	8.7342	0.036223	8.7834	0.11725	8.7342	0.0796	8.7342	0.026258
8.8382	0.07194	8.7881	0.0099537	8.7881	0.035929	8.8382	0.11805	8.7881	0.0798	8.7881	0.026805
8.893	0.072039	8.8419	0.010727	8.8419	0.03632	8.893	0.12014	8.8419	0.0801	8.8419	0.026593
8.9479	0.072177	8.8958	0.010099	8.8958	0.036006	8.9479	0.11822	8.8958	0.0802	8.8958	0.02632
9.0027	0.072066	8.9497	0.010503	8.9497	0.036384	9.0027	0.11869	8.9497	0.0804	8.9497	0.025597
9.0576	0.072188	9.0035	0.010098	9.0035	0.03582	9.0576	0.11813	9.0035	0.0806	9.0035	0.026521
9.1124	0.072345	9.0574	0.010436	9.0574	0.03557	9.1124	0.11808	9.0574	0.081	9.0574	0.025811
9.1672	0.072593	9.1112	0.0098569	9.1112	0.036451	9.1672	0.11835	9.1112	0.0815	9.1112	0.026187
9.2221	0.072864	9.1651	0.010406	9.1651	0.037268	9.2221	0.11922	9.1651	0.0819	9.1651	0.026841
9.277	0.072845	9.219	0.010031	9.219	0.036553	9.277	0.11937	9.219	0.0824	9.219	0.026179
9.3318	0.07276	9.2729	0.010158	9.2729	0.036789	9.3318	0.11869	9.2729	0.0828	9.2729	0.026582
9.3867	0.072679	9.3267	0.010143	9.3267	0.036939	9.3867	0.11924	9.3267	0.0832	9.3267	0.025908
9.4415	0.072433	9.3806	0.010481	9.3806	0.036023	9.4415	0.11783	9.3806	0.0837	9.3806	0.026118
9.4964	0.072376	9.4345	0.010457	9.4345	0.036574	9.4964	0.11806	9.4345	0.0844	9.4345	0.026454
9.5512	0.07247	9.4884	0.01042	9.4884	0.036978	9.5512	0.11818	9.4884	0.0851	9.4884	0.02622
9.6061	0.072719	9.5422	0.010245	9.5422	0.036701	9.6061	0.11891	9.5422	0.0857	9.5422	0.024955
9.661	0.0732	9.5961	0.010584	9.5961	0.03754	9.661	0.12039	9.5961	0.0864	9.5961	0.027157
9.7158	0.07322	9.65	0.010541	9.65	0.037223	9.7158	0.12	9.65	0.087	9.65	0.026088
9.7707	0.07382	9.7039	0.010979	9.7039	0.038244	9.7707	0.12145	9.7039	0.0876	9.7039	0.026214
9.8256	0.07462	9.7578	0.010917	9.7578	0.038251	9.8256	0.12067	9.7578	0.088	9.7578	0.026848
9.8805	0.07513	9.8117	0.01236	9.8117	0.038523	9.8805	0.12053	9.8117	0.0884	9.8117	0.026689
9.9353	0.07603	9.8656	0.012719	9.8656	0.039016	9.9353	0.12163	9.8656	0.0888	9.8656	0.028268
9.9902	0.07688	9.9195	0.014219	9.9195	0.040131	9.9902	0.12104	9.9195	0.0892	9.9195	0.029106
10.045	0.07781	9.9734	0.014495	9.9734	0.041286	10.045	0.12138	9.9734	0.0894	9.9734	0.029543
10.1	0.07884	10.027	0.014981	10.027	0.04222	10.1	0.1223	10.027	0.0896	10.027	0.030513
10.155	0.08002	10.081	0.015244	10.081	0.04338	10.155	0.12308	10.081	0.0899	10.081	0.032762
10.21	0.08081	10.135	0.014748	10.135	0.043867	10.21	0.12411	10.135	0.0901	10.135	0.03187
10.265	0.08157	10.189	0.015536	10.189	0.045088	10.265	0.12473	10.189	0.0902	10.189	0.033172
10.319	0.08204	10.243	0.015933	10.243	0.044993	10.319	0.12406	10.243	0.09	10.243	0.031802
10.374	0.08221	10.297	0.015105	10.297	0.044549	10.374	0.1255	10.297	0.0898	10.297	0.032076
10.429	0.08217	10.351	0.015029	10.351	0.044357	10.429	0.12584	10.351	0.0894	10.351	0.031842
10.484	0.08194	10.405	0.013453	10.405	0.04335	10.484	0.12523	10.405	0.0888	10.405	0.030843
10.539	0.08135	10.459	0.013159	10.459	0.041297	10.539	0.12457	10.459	0.088	10.459	0.030027
10.594	0.0806	10.512	0.011976	10.512	0.042058	10.594	0.1256	10.513	0.0872	10.512	0.029931
10.649	0.0798	10.566	0.010779	10.566	0.040016	10.649	0.12413	10.566	0.0863	10.566	0.028152
10.704	0.07896	10.62	0.010494	10.62	0.038443	10.704	0.12302	10.62	0.0854	10.62	0.027232
10.759	0.07787	10.674	0.010874	10.674	0.038186	10.759	0.12211	10.674	0.0846	10.674	0.026904
10.814	0.07678	10.728	0.01037	10.728	0.037052	10.814	0.12099	10.728	0.0838	10.728	0.026502
10.869	0.07607	10.782	0.010193	10.782	0.03701	10.869	0.12216	10.782	0.0831	10.782	0.025813
10.924	0.07529	10.836	0.010668	10.836	0.037195	10.924	0.12092	10.836	0.0823	10.836	0.026519
10.978	0.0748	10.89	0.010203	10.89	0.036805	10.978	0.12123	10.89	0.0817	10.89	0.024623
11.033	0.07414	10.944	0.010624	10.944	0.036538	11.033	0.11892	10.944	0.0812	10.944	0.025185
11.088	0.07381	10.998	0.010901	10.998	0.037032	11.088	0.11968	10.998	0.0807	10.998	0.025398
11.143	0.07369	11.052	0.01082	11.052	0.035995	11.143	0.12022	11.052	0.0804	11.052	0.026627
11.198	0.0734	11.106	0.010384	11.106	0.035917	11.198	0.11853	11.106	0.0802	11.106	0.025875
11.253	0.07307	11.16	0.010419	11.16	0.036127	11.253	0.11998	11.16	0.0802	11.16	0.026464
11.308	0.072797	11.214	0.01035	11.214	0.035908	11.308	0.11857	11.214	0.0801	11.214	0.026577
11.363	0.072835	11.268	0.010373	11.268	0.03668	11.363	0.11902	11.268	0.0799	11.268	0.025637
11.418	0.0729	11.322	0.010344	11.322	0.035692	11.418	0.11797	11.322	0.0798	11.322	0.025008
11.473	0.072983	11.376	0.010667	11.376	0.035879	11.473	0.11819	11.376	0.0798	11.376	0.02564
11.528	0.072948	11.43	0.01055	11.43	0.036972	11.528	0.11971	11.43	0.0797	11.43	0.026125
11.583	0.072906	11.483	0.01037	11.483	0.035823	11.583	0.11957	11.484	0.0797	11.483	0.025366
11.638	0.072781	11.538	0.010604	11.538	0.03628	11.638	0.11817	11.538	0.0797	11.538	0.025928
11.693	0.072773	11.592	0.010299	11.592	0.035905	11.693	0.11858	11.591	0.0797	11.592	0.026691
11.748	0.072519	11.645	0.0096502	11.645	0.036307	11.748	0.11935	11.645	0.0798	11.645	0.025777
11.803	0.07238	11.699	0.010185	11.699	0.035604	11.803	0.11756	11.699	0.0799	11.699	0.025334
11.858	0.072352	11.753	0.010297	11.753	0.035489	11.858	0.11749	11.753	0.08	11.753	0.025563
11.913	0.072321	11.807	0.0099493	11.807	0.03522	11.913	0.11795	11.807	0.0802	11.807	0.026187
11.967	0.07231	11.861	0.0097325	11.861	0.036233	11.967	0.11831	11.861	0.0803	11.861	0.026777
12.022	0.072384	11.915	0.010122	11.915	0.036584	12.022	0.11812	11.915	0.0805	11.915	0.026674
12.077	0.072329	11.969	0.010267	11.969	0.035437	12.077	0.11779	11.969	0.0807	11.969	0.025415
12.132	0.072067	12.023	0.010014	12.023	0.036004	12.132	0.11769	12.023	0.0808	12.023	0.026615
12.187	0.072054	12.077	0.0096848	12.077	0.035165	12.187	0.11824	12.077	0.0808	12.077	0.025552
12.242	0.072197	12.131	0.010421	12.131	0.035631	12.242	0.11886	12.131	0.0809	12.131	0.02629
12.297	0.072005	12.185	0.010154	12.185	0.036186	12.297	0.11888	12.185	0.0809	12.185	0.025754
12.352	0.071898	12.239	0.01049	12.239	0.035297	12.352	0.11931	12.239	0.081	12.239	0.026179
12.407	0.072323	12.293	0.010065	12.293	0.036198	12.407	0.11871	12.293	0.0808	12.293	0.025892
12.462	0.072646	12.347	0.010669	12.347	0.03661	12.462	0.11837	12.347	0.0808	12.347	0.026103
12.517	0.072784	12.401	0.010178	12.401	0.036875	12.517	0.119	12.401	0.0809	12.401	0.026491
12.572	0.072768	12.455	0.01061	12.455	0.036283	12.572	0.11906	12.455	0.081	12.455	0.025949
12.627	0.072953	12.509	0.0097529	12.509	0.035952	12.627	0.11861	12.509	0.0811	12.509	0.025932
12.682	0.07315	12.563	0.010112	12.563	0.036057	12.682	0.11828	12.563	0.0813	12.563	0.025701
12.737	0.07325	12.617	0.0099242	12.617	0.036788	12.737	0.11909	12.617	0.0815	12.617	0.026193
12.792	0.07355	12.672	0.010019	12.672	0.036704	12.792	0.11897	12.671	0.0817	12.672	0.025923
12.847	0.07373	12.726	0.010336	12.726	0.036882	12.847	0.11973	12.725	0.0821	12.726	0.026846
12.902	0.07422	12.78	0.010612	12.78	0.036652	12.902	0.12049	12.78	0.0827	12.78	0.026487
12.957	0.07472	12.834	0.010333	12.834	0.03711	12.957	0.1204	12.834	0.0835	12.834	0.026076
13.012	0.0752	12.888	0.010397	12.888	0.037621	13.012	0.12093	12.888	0.0845	12.888	0.027337
13.068	0.07582	12.942	0.010729	12.942	0.03804	13.068	0.122	12.942	0.0855	12.942	0.026492
13.123	0.07649	12.996	0.010709	12.996	0.039114	13.123	0.1227	12.996	0.087	12.996	0.02721
13.177	0.07721	13.05	0.010578	13.05	0.039155	13.177	0.12242	13.05	0.0886	13.05	0.027063
13.233	0.07827	13.104	0.011541	13.104	0.039192	13.233	0.12268	13.104	0.0903	13.104	0.028863
13.288	0.07938	13.158	0.01198	13.158	0.039603	13.288	0.12379	13.158	0.0922	13.158	0.028981
13.343	0.08091	13.212	0.012367	13.212	0.041415	13.343	0.12511	13.212	0.0942	13.212	0.028931
13.398	0.08239	13.266	0.013944	13.266	0.042952	13.398	0.12648	13.266	0.096	13.266	0.031184
13.453	0.08401	13.32	0.016214	13.32	0.044018	13.453	0.12696	13.32	0.0978	13.32	0.03306
13.508	0.08573	13.374	0.018812	13.374	0.044975	13.508	0.12681	13.374	0.0993	13.374	0.035498
13.563	0.087	13.428	0.022285	13.428	0.047626	13.563	0.12963	13.428	0.101	13.428	0.03872
13.618	0.08791	13.482	0.024046	13.482	0.048946	13.618	0.128	13.482	0.102	13.482	0.041101
13.673	0.08873	13.536	0.025754	13.536	0.050782	13.673	0.1294	13.536	0.102	13.536	0.042561
13.728	0.08962	13.59	0.024681	13.59	0.051138	13.728	0.12925	13.59	0.102	13.59	0.042665
13.783	0.08984	13.644	0.022791	13.644	0.052146	13.783	0.12709	13.644	0.102	13.644	0.041737
13.838	0.08935	13.698	0.020275	13.698	0.051838	13.838	0.12587	13.699	0.101	13.698	0.040181
13.893	0.08898	13.753	0.017486	13.753	0.049656	13.893	0.1257	13.753	0.0998	13.753	0.038453
13.948	0.08819	13.807	0.015221	13.807	0.0486	13.948	0.12417	13.807	0.0984	13.807	0.035073
14.003	0.08713	13.861	0.013091	13.861	0.04659	14.003	0.12252	13.861	0.0967	13.861	0.033946
14.059	0.08558	13.915	0.012326	13.915	0.044757	14.059	0.12205	13.915	0.0947	13.915	0.030879
14.114	0.08407	13.969	0.011577	13.969	0.042846	14.114	0.12133	13.969	0.0926	13.969	0.029458
14.169	0.08244	14.023	0.011197	14.023	0.041673	14.169	0.11973	14.023	0.0905	14.023	0.028183
14.224	0.08055	14.077	0.010592	14.077	0.040201	14.224	0.11901	14.077	0.0887	14.077	0.027308
14.279	0.07909	14.131	0.010652	14.131	0.039396	14.279	0.11827	14.131	0.087	14.131	0.027555
14.334	0.07753	14.185	0.010574	14.185	0.038923	14.334	0.11867	14.185	0.0854	14.185	0.027819
14.389	0.07635	14.24	0.010555	14.24	0.03798	14.389	0.12003	14.239	0.084	14.24	0.027187
14.444	0.07546	14.294	0.010248	14.294	0.037616	14.444	0.11793	14.294	0.0827	14.294	0.026507
14.499	0.07494	14.348	0.010904	14.348	0.036568	14.499	0.1188	14.348	0.0817	14.348	0.027145
14.554	0.07415	14.402	0.01015	14.402	0.036277	14.554	0.11779	14.402	0.0808	14.402	0.027033
14.61	0.07365	14.456	0.010269	14.456	0.036539	14.61	0.11776	14.456	0.0802	14.456	0.027114
14.665	0.07327	14.51	0.011246	14.51	0.036442	14.665	0.11776	14.51	0.0798	14.51	0.026825
14.72	0.07322	14.564	0.010486	14.564	0.036565	14.72	0.11824	14.564	0.0795	14.564	0.026278
14.775	0.0733	14.618	0.010329	14.618	0.035664	14.775	0.11777	14.618	0.0794	14.618	0.027257
14.83	0.07313	14.672	0.010135	14.672	0.035974	14.83	0.11785	14.672	0.0793	14.672	0.026347
14.885	0.07287	14.727	0.010577	14.727	0.035758	14.885	0.11846	14.727	0.0793	14.727	0.025459
14.94	0.072569	14.781	0.010619	14.781	0.035398	14.94	0.11644	14.781	0.0794	14.781	0.026488
14.995	0.072766	14.835	0.010215	14.835	0.035745	14.995	0.11862	14.835	0.0795	14.835	0.025156
15.05	0.072858	14.889	0.010563	14.889	0.035863	15.05	0.1177	14.889	0.0796	14.889	0.026649
15.106	0.072939	14.943	0.010151	14.943	0.035441	15.106	0.11796	14.943	0.0797	14.943	0.025579
15.161	0.072962	14.997	0.010151	14.997	0.03567	15.161	0.11734	14.997	0.0797	14.997	0.025675
15.216	0.0732	15.052	0.010243	15.052	0.036218	15.216	0.11792	15.052	0.0797	15.052	0.025346
15.271	0.07324	15.106	0.010359	15.106	0.035496	15.271	0.11788	15.106	0.0798	15.106	0.025718
15.326	0.07311	15.16	0.010356	15.16	0.035715	15.326	0.11707	15.16	0.0799	15.16	0.026121
15.382	0.0732	15.214	0.010475	15.214	0.035693	15.382	0.11767	15.214	0.08	15.214	0.026153
15.437	0.07315	15.268	0.010473	15.268	0.035	15.437	0.11686	15.268	0.0801	15.268	0.025984
15.492	0.07336	15.323	0.010156	15.323	0.035424	15.492	0.11675	15.322	0.0801	15.323	0.027059
15.547	0.07315	15.377	0.01015	15.377	0.035662	15.547	0.11708	15.377	0.0802	15.377	0.025688
15.602	0.07319	15.431	0.010586	15.431	0.035666	15.602	0.11658	15.431	0.0802	15.431	0.026721
15.657	0.07323	15.485	0.010206	15.485	0.035546	15.657	0.11715	15.485	0.0802	15.485	0.026566
15.713	0.07324	15.539	0.010405	15.539	0.03537	15.713	0.11588	15.539	0.0802	15.539	0.026141
15.768	0.07316	15.593	0.010604	15.593	0.036065	15.768	0.11698	15.593	0.0802	15.593	0.025639
15.823	0.072982	15.648	0.010124	15.648	0.036241	15.823	0.11713	15.648	0.0803	15.648	0.025307
15.878	0.072691	15.702	0.010234	15.702	0.035687	15.878	0.11744	15.702	0.0803	15.702	0.026043
15.933	0.072268	15.756	0.010233	15.756	0.035365	15.933	0.11577	15.756	0.0804	15.756	0.02626
15.988	0.072152	15.81	0.010224	15.81	0.035614	15.988	0.11652	15.81	0.0805	15.81	0.025988
16.044	0.072089	15.864	0.010007	15.864	0.035515	16.044	0.11777	15.864	0.0806	15.864	0.025996
16.099	0.072	15.919	0.010059	15.919	0.036447	16.099	0.11781	15.919	0.0806	15.919	0.025865
16.154	0.071926	15.973	0.010342	15.973	0.03556	16.154	0.11741	15.973	0.0805	15.973	0.025786
16.209	0.071968	16.027	0.010688	16.027	0.035901	16.209	0.11677	16.027	0.0804	16.027	0.025911
16.265	0.07198	16.081	0.010177	16.081	0.035817	16.265	0.11708	16.081	0.0802	16.081	0.024964
16.32	0.071827	16.135	0.010123	16.135	0.036193	16.32	0.11832	16.136	0.0801	16.135	0.025945
16.375	0.071788	16.19	0.010082	16.19	0.0358	16.375	0.11752	16.19	0.0801	16.19	0.026635
16.43	0.071653	16.244	0.01041	16.244	0.036079	16.43	0.11757	16.244	0.08	16.244	0.026098
16.486	0.071651	16.298	0.010343	16.298	0.03563	16.486	0.11738	16.298	0.0799	16.298	0.026021
16.541	0.071584	16.353	0.010161	16.353	0.036059	16.541	0.11798	16.352	0.0798	16.353	0.026744
16.596	0.071337	16.407	0.010488	16.407	0.036385	16.596	0.11821	16.407	0.0797	16.407	0.025941
16.651	0.071432	16.461	0.010043	16.461	0.036213	16.651	0.11896	16.461	0.0795	16.461	0.026402
16.707	0.071822	16.515	0.010286	16.515	0.03693	16.707	0.11814	16.515	0.0792	16.515	0.025517
16.762	0.072122	16.569	0.010544	16.569	0.036328	16.762	0.11885	16.569	0.079	16.569	0.025986
16.817	0.072242	16.624	0.010479	16.624	0.036863	16.817	0.11785	16.624	0.0788	16.624	0.026771
16.872	0.072423	16.678	0.010468	16.678	0.036241	16.872	0.11824	16.678	0.0789	16.678	0.026603
16.928	0.072748	16.732	0.010136	16.732	0.037153	16.928	0.12046	16.732	0.0792	16.732	0.026259
16.983	0.07334	16.787	0.010706	16.787	0.036957	16.983	0.1202	16.787	0.0798	16.787	0.0265
17.038	0.07389	16.841	0.010579	16.841	0.037665	17.038	0.12047	16.841	0.0806	16.841	0.026841
17.094	0.07471	16.895	0.011014	16.895	0.03743	17.094	0.1207	16.895	0.0818	16.895	0.027729
17.149	0.07557	16.949	0.011145	16.949	0.038255	17.149	0.12118	16.949	0.0833	16.949	0.02665
17.204	0.07672	17.004	0.011548	17.004	0.039262	17.204	0.1218	17.004	0.0851	17.004	0.027444
17.259	0.07808	17.058	0.012026	17.058	0.040276	17.259	0.12389	17.058	0.0874	17.058	0.028456
17.315	0.07966	17.112	0.013027	17.112	0.041181	17.315	0.12304	17.112	0.09	17.112	0.028911
17.37	0.08119	17.167	0.014445	17.167	0.042782	17.37	0.12498	17.167	0.0928	17.167	0.030956
17.425	0.08266	17.221	0.016272	17.221	0.043677	17.425	0.1247	17.221	0.0959	17.221	0.032012
17.481	0.08412	17.275	0.019027	17.275	0.046105	17.481	0.12648	17.275	0.099	17.275	0.034992
17.536	0.0858	17.33	0.023108	17.33	0.048631	17.536	0.12672	17.33	0.102	17.33	0.037583
17.591	0.0873	17.384	0.025755	17.384	0.050103	17.591	0.12736	17.384	0.105	17.384	0.040676
17.646	0.08847	17.438	0.028905	17.438	0.053034	17.646	0.12796	17.438	0.107	17.438	0.042937
17.702	0.0898	17.493	0.029491	17.493	0.055037	17.702	0.12893	17.493	0.109	17.493	0.044043
17.757	0.09103	17.547	0.028382	17.547	0.056669	17.757	0.12897	17.547	0.111	17.547	0.046171
17.813	0.09176	17.601	0.026145	17.601	0.058155	17.813	0.12823	17.601	0.112	17.601	0.046838
17.868	0.09207	17.656	0.02329	17.656	0.058041	17.868	0.12766	17.656	0.112	17.656	0.045473
17.923	0.09222	17.71	0.02044	17.71	0.057985	17.923	0.12704	17.71	0.112	17.71	0.043979
17.979	0.09195	17.764	0.018402	17.764	0.056086	17.979	0.12875	17.764	0.111	17.764	0.040816
18.034	0.09122	17.819	0.017517	17.819	0.054906	18.034	0.12602	17.819	0.11	17.819	0.039312
18.089	0.09024	17.873	0.017262	17.873	0.053644	18.089	0.12669	17.873	0.108	17.873	0.037471
18.145	0.08904	17.927	0.01722	17.927	0.051728	18.145	0.12446	17.927	0.106	17.927	0.035778
18.2	0.08776	17.982	0.016302	17.982	0.050425	18.2	0.12634	17.982	0.104	17.982	0.035358
18.255	0.08619	18.036	0.016217	18.036	0.04831	18.255	0.12438	18.036	0.101	18.036	0.033916
18.311	0.08478	18.09	0.015173	18.09	0.04653	18.311	0.12308	18.09	0.0988	18.09	0.03322
18.366	0.08332	18.145	0.014631	18.145	0.045675	18.366	0.12281	18.145	0.0963	18.145	0.032378
18.421	0.08196	18.199	0.013155	18.199	0.043264	18.421	0.12099	18.199	0.0938	18.199	0.03143
18.477	0.08033	18.253	0.012404	18.253	0.042532	18.477	0.12049	18.254	0.0915	18.253	0.030642
18.532	0.07883	18.308	0.011968	18.308	0.040544	18.532	0.12032	18.308	0.0895	18.308	0.029634
18.588	0.07753	18.362	0.011092	18.362	0.040464	18.588	0.12015	18.362	0.0876	18.362	0.029004
18.643	0.07665	18.417	0.010842	18.417	0.039522	18.643	0.11981	18.417	0.086	18.417	0.027905
18.698	0.07578	18.471	0.011113	18.471	0.03832	18.698	0.11928	18.471	0.0847	18.471	0.028255
18.754	0.07505	18.525	0.010726	18.525	0.038748	18.754	0.1187	18.525	0.0836	18.525	0.027818
18.809	0.07463	18.58	0.010509	18.58	0.037928	18.809	0.11822	18.58	0.0826	18.58	0.027883
18.865	0.07417	18.634	0.01066	18.634	0.037936	18.865	0.11804	18.634	0.0818	18.634	0.026796
18.92	0.0739	18.689	0.010479	18.689	0.0375	18.92	0.11789	18.689	0.0814	18.689	0.027312
18.976	0.07366	18.743	0.010538	18.743	0.037152	18.976	0.11716	18.743	0.081	18.743	0.026487
19.031	0.07343	18.798	0.010907	18.798	0.037406	19.031	0.11778	18.798	0.0808	18.798	0.026794
19.087	0.0732	18.852	0.011337	18.852	0.03775	19.087	0.1175	18.852	0.0806	18.852	0.027119
19.142	0.072989	18.906	0.010779	18.906	0.036947	19.142	0.11795	18.907	0.0804	18.906	0.027708
19.197	0.07306	18.961	0.010944	18.961	0.037494	19.197	0.11705	18.961	0.0803	18.961	0.027053
19.253	0.07318	19.015	0.011217	19.015	0.037243	19.253	0.11713	19.015	0.0803	19.015	0.027513
19.308	0.0732	19.07	0.011497	19.07	0.03802	19.308	0.11788	19.07	0.0802	19.07	0.02754
19.364	0.07324	19.124	0.012027	19.124	0.038062	19.364	0.11772	19.124	0.0802	19.124	0.028269
19.419	0.07329	19.179	0.012455	19.179	0.038192	19.419	0.11675	19.179	0.0803	19.179	0.029273
19.475	0.07356	19.233	0.01299	19.233	0.0389	19.475	0.11809	19.233	0.0804	19.233	0.029897
19.53	0.07365	19.288	0.013799	19.288	0.03912	19.53	0.11842	19.288	0.0805	19.288	0.030301
19.586	0.07345	19.342	0.014038	19.342	0.039196	19.586	0.11675	19.342	0.0807	19.342	0.031367
19.641	0.07357	19.397	0.014431	19.397	0.038686	19.641	0.11809	19.397	0.081	19.397	0.030659
19.697	0.07338	19.451	0.014525	19.451	0.039387	19.697	0.11705	19.451	0.0811	19.451	0.030802
19.752	0.07344	19.506	0.014573	19.506	0.039342	19.752	0.11726	19.506	0.0814	19.506	0.030484
19.808	0.07358	19.56	0.013937	19.56	0.039233	19.808	0.11814	19.56	0.0815	19.56	0.030168
19.863	0.07361	19.615	0.013122	19.615	0.038552	19.863	0.11635	19.615	0.0816	19.615	0.030425
19.919	0.07353	19.669	0.012488	19.669	0.038618	19.919	0.11709	19.669	0.0816	19.669	0.029938
19.974	0.07348	19.723	0.011814	19.723	0.038095	19.974	0.11669	19.724	0.0817	19.723	0.028669
20.03	0.07329	19.778	0.011544	19.778	0.037901	20.03	0.11586	19.778	0.0817	19.778	0.02898
20.085	0.07307	19.833	0.011545	19.833	0.038779	20.085	0.11523	19.833	0.0816	19.833	0.028139
20.141	0.072909	19.887	0.011307	19.887	0.037605	20.141	0.11578	19.887	0.0815	19.887	0.028087
20.196	0.072984	19.941	0.011319	19.941	0.037763	20.196	0.11629	19.942	0.0813	19.941	0.027247
20.252	0.072884	19.996	0.011492	19.996	0.037901	20.252	0.1158	19.996	0.0811	19.996	0.02778
20.307	0.072892	20.051	0.011722	20.051	0.037307	20.307	0.11587	20.051	0.0809	20.051	0.027284
20.363	0.07301	20.105	0.011745	20.105	0.037536	20.363	0.11641	20.105	0.0807	20.105	0.027888
20.418	0.07308	20.16	0.011379	20.16	0.037543	20.418	0.11629	20.16	0.0806	20.16	0.027441
20.474	0.07306	20.214	0.011228	20.214	0.037868	20.474	0.11578	20.214	0.0805	20.214	0.028063
20.529	0.07325	20.269	0.01143	20.269	0.03675	20.529	0.11596	20.269	0.0806	20.269	0.027883
20.585	0.07342	20.323	0.011495	20.323	0.03705	20.585	0.11633	20.323	0.0807	20.323	0.02699
20.64	0.07353	20.378	0.011374	20.378	0.03794	20.64	0.11682	20.378	0.0808	20.378	0.028403
20.696	0.07359	20.432	0.011489	20.432	0.03735	20.696	0.1165	20.432	0.081	20.432	0.027482
20.752	0.07363	20.487	0.011654	20.487	0.038307	20.752	0.11637	20.487	0.0812	20.487	0.028018
20.807	0.07349	20.542	0.012176	20.542	0.037799	20.807	0.11633	20.542	0.0813	20.542	0.028567
20.863	0.07368	20.596	0.012347	20.596	0.038726	20.863	0.11611	20.596	0.0815	20.596	0.028698
20.919	0.07381	20.651	0.013302	20.651	0.038803	20.919	0.11647	20.651	0.0817	20.651	0.029111
20.974	0.07374	20.705	0.01403	20.705	0.039169	20.974	0.11647	20.705	0.082	20.705	0.029288
21.03	0.07342	20.76	0.014329	20.76	0.039086	21.03	0.11583	20.76	0.0823	20.76	0.030524
21.085	0.07334	20.815	0.014727	20.815	0.039723	21.085	0.1155	20.815	0.0825	20.815	0.030886
21.141	0.07317	20.869	0.014951	20.869	0.039725	21.141	0.11613	20.869	0.0827	20.869	0.030592
21.197	0.07317	20.924	0.01488	20.924	0.039833	21.197	0.11502	20.924	0.0829	20.924	0.031075
21.252	0.07308	20.978	0.014452	20.978	0.039639	21.252	0.11528	20.978	0.0832	20.978	0.030886
21.308	0.072909	21.033	0.013702	21.033	0.039771	21.308	0.1151	21.033	0.0835	21.033	0.030988
21.363	0.07271	21.088	0.013107	21.088	0.039841	21.363	0.1145	21.088	0.0837	21.088	0.030328
21.419	0.072741	21.142	0.0121	21.142	0.038888	21.419	0.11478	21.142	0.0838	21.142	0.030392
21.475	0.072733	21.197	0.011148	21.197	0.03831	21.475	0.1149	21.197	0.0839	21.197	0.029016
21.53	0.07251	21.251	0.010986	21.251	0.038458	21.53	0.11367	21.251	0.084	21.251	0.02792
21.586	0.072443	21.306	0.011089	21.306	0.037218	21.586	0.11442	21.306	0.0839	21.306	0.027873
21.642	0.072511	21.361	0.010595	21.361	0.037389	21.642	0.11417	21.361	0.0838	21.361	0.027868
21.697	0.072461	21.415	0.011104	21.415	0.036599	21.697	0.11384	21.415	0.0836	21.415	0.027468
21.753	0.072535	21.47	0.010591	21.47	0.036084	21.753	0.11363	21.47	0.0832	21.47	0.02783
21.809	0.072573	21.525	0.010934	21.525	0.035736	21.809	0.11391	21.525	0.0828	21.525	0.027689
21.864	0.072605	21.579	0.010505	21.579	0.035739	21.864	0.11294	21.579	0.0824	21.579	0.027676
21.92	0.072716	21.634	0.010406	21.634	0.035515	21.92	0.11277	21.634	0.082	21.634	0.027906
21.976	0.072864	21.689	0.010386	21.689	0.035157	21.976	0.11367	21.689	0.0816	21.689	0.026579
22.031	0.07301	21.743	0.010508	21.743	0.035143	22.031	0.11393	21.743	0.0813	21.743	0.026889
22.087	0.072959	21.798	0.010889	21.798	0.035229	22.087	0.11349	21.798	0.0809	21.798	0.026258
22.143	0.072829	21.853	0.010621	21.853	0.035197	22.143	0.11323	21.853	0.0805	21.853	0.027354
22.199	0.072924	21.907	0.01088	21.907	0.034997	22.199	0.11281	21.907	0.0801	21.907	0.026737
22.254	0.07307	21.962	0.010651	21.962	0.034513	22.254	0.11392	21.962	0.0798	21.962	0.026928
22.31	0.0732	22.017	0.010393	22.017	0.034867	22.31	0.11247	22.017	0.0797	22.017	0.026683
22.366	0.07336	22.071	0.010997	22.071	0.034988	22.366	0.11242	22.071	0.0796	22.071	0.026934
22.421	0.07344	22.126	0.010762	22.126	0.034716	22.421	0.11279	22.126	0.0796	22.126	0.027518
22.477	0.07363	22.181	0.010649	22.181	0.035126	22.477	0.11215	22.181	0.0795	22.181	0.026385
22.533	0.07354	22.236	0.01029	22.236	0.034828	22.533	0.11273	22.236	0.0795	22.236	0.026536
22.589	0.07337	22.29	0.010596	22.29	0.034234	22.589	0.11248	22.29	0.0796	22.29	0.02709
22.645	0.07321	22.345	0.010399	22.345	0.034659	22.645	0.11234	22.345	0.0797	22.345	0.027827
22.7	0.07332	22.4	0.010462	22.4	0.034762	22.7	0.11282	22.4	0.0797	22.4	0.027372
22.756	0.07337	22.455	0.010541	22.455	0.034577	22.756	0.11294	22.454	0.0799	22.455	0.026902
22.812	0.07329	22.509	0.010598	22.509	0.034205	22.812	0.11263	22.509	0.0801	22.509	0.027477
22.868	0.07319	22.564	0.010598	22.564	0.034791	22.868	0.11278	22.564	0.0804	22.564	0.027516
22.923	0.07321	22.619	0.010631	22.619	0.034399	22.923	0.11273	22.619	0.0807	22.619	0.027622
22.979	0.0732	22.674	0.01064	22.674	0.034441	22.979	0.11217	22.674	0.0811	22.674	0.026791
23.035	0.07314	22.728	0.01088	22.728	0.03478	23.035	0.11268	22.728	0.0815	22.728	0.028473
23.091	0.072992	22.783	0.010709	22.783	0.034343	23.091	0.1129	22.783	0.0819	22.783	0.028059
23.146	0.07287	22.838	0.011052	22.838	0.034072	23.146	0.11225	22.838	0.0821	22.838	0.027672
23.202	0.072713	22.893	0.010758	22.893	0.034753	23.202	0.1127	22.893	0.0823	22.893	0.027862
23.258	0.072475	22.948	0.010667	22.948	0.034832	23.258	0.11189	22.947	0.0825	22.948	0.027835
23.314	0.072357	23.002	0.011081	23.002	0.03495	23.314	0.1135	23.002	0.0825	23.002	0.027462
23.37	0.072506	23.057	0.010779	23.057	0.034838	23.37	0.11179	23.057	0.0826	23.057	0.027341
23.426	0.072641	23.112	0.011149	23.112	0.034706	23.426	0.11326	23.112	0.0827	23.112	0.028782
23.481	0.072771	23.167	0.010786	23.167	0.034513	23.481	0.113	23.167	0.0826	23.167	0.027354
23.537	0.072665	23.222	0.010629	23.222	0.034787	23.537	0.11295	23.222	0.0826	23.222	0.028125
23.593	0.072709	23.276	0.010651	23.276	0.034519	23.593	0.11374	23.276	0.0825	23.276	0.027917
23.649	0.072649	23.331	0.010988	23.331	0.034558	23.649	0.11278	23.331	0.0825	23.331	0.027334
23.705	0.072778	23.386	0.010644	23.386	0.035129	23.705	0.11207	23.386	0.0825	23.386	0.028394
23.761	0.07301	23.441	0.010783	23.441	0.03577	23.761	0.11223	23.441	0.0825	23.441	0.02721
23.816	0.07314	23.496	0.011212	23.496	0.035306	23.816	0.11333	23.496	0.0825	23.496	0.027994
23.872	0.07313	23.551	0.010893	23.551	0.034883	23.872	0.11385	23.55	0.0828	23.551	0.027345
23.928	0.07306	23.605	0.011282	23.605	0.03538	23.928	0.11237	23.605	0.083	23.605	0.028332
23.984	0.07309	23.66	0.011105	23.66	0.034761	23.984	0.1124	23.66	0.0832	23.66	0.027887
24.04	0.07314	23.715	0.011147	23.715	0.034999	24.04	0.11308	23.715	0.0834	23.715	0.029207
24.096	0.07329	23.77	0.011335	23.77	0.035147	24.096	0.11385	23.77	0.0837	23.77	0.027983
24.152	0.07322	23.825	0.011696	23.825	0.036371	24.152	0.11325	23.825	0.0839	23.825	0.028692
24.208	0.07335	23.88	0.012245	23.88	0.035929	24.208	0.11289	23.88	0.084	23.88	0.029826
24.264	0.07359	23.935	0.011812	23.935	0.035972	24.264	0.1139	23.935	0.0841	23.935	0.029132
24.32	0.07361	23.989	0.012559	23.989	0.036519	24.32	0.11385	23.989	0.0843	23.989	0.029677
24.375	0.07363	24.044	0.013638	24.044	0.036389	24.375	0.11371	24.044	0.0844	24.044	0.03028
24.431	0.07379	24.099	0.013258	24.099	0.03638	24.431	0.11259	24.099	0.0845	24.099	0.030865
24.487	0.07412	24.154	0.014183	24.154	0.03629	24.487	0.11324	24.154	0.0847	24.154	0.030618
24.543	0.07423	24.209	0.013862	24.209	0.036335	24.543	0.11293	24.209	0.0849	24.209	0.031976
24.599	0.07417	24.264	0.013876	24.264	0.037064	24.599	0.11316	24.264	0.0852	24.264	0.031301
24.655	0.07431	24.319	0.013506	24.319	0.037238	24.655	0.1148	24.319	0.0855	24.319	0.031138
24.711	0.0745	24.374	0.013526	24.374	0.037274	24.711	0.11504	24.374	0.0859	24.374	0.031766
24.767	0.07462	24.429	0.013707	24.429	0.03744	24.767	0.11372	24.429	0.0863	24.429	0.030612
24.823	0.07487	24.484	0.013781	24.484	0.037637	24.823	0.1156	24.484	0.0867	24.484	0.03197
24.879	0.07501	24.539	0.014237	24.539	0.037814	24.879	0.1144	24.539	0.0871	24.539	0.031462
24.935	0.07519	24.594	0.014206	24.594	0.037601	24.935	0.11444	24.594	0.0877	24.594	0.031241
24.991	0.0755	24.649	0.014237	24.649	0.037445	24.991	0.11503	24.649	0.0882	24.649	0.032498
25.047	0.07576	24.704	0.014536	24.704	0.037873	25.047	0.11469	24.704	0.0887	24.704	0.031283
25.103	0.07597	24.759	0.014268	24.759	0.037644	25.103	0.11523	24.759	0.0891	24.759	0.031681
25.159	0.07633	24.814	0.013931	24.814	0.038036	25.159	0.11503	24.814	0.0895	24.814	0.031609
25.215	0.07685	24.869	0.013701	24.869	0.037741	25.215	0.11648	24.869	0.09	24.869	0.033125
25.271	0.07715	24.924	0.012856	24.924	0.037531	25.271	0.11569	24.924	0.0904	24.924	0.031983
25.327	0.0777	24.979	0.013436	24.979	0.037653	25.327	0.11445	24.979	0.0908	24.979	0.032904
25.383	0.07805	25.034	0.013468	25.034	0.039077	25.383	0.11705	25.034	0.0913	25.034	0.032835
25.439	0.07815	25.088	0.014374	25.088	0.037789	25.439	0.11618	25.089	0.0919	25.088	0.03453
25.495	0.07828	25.144	0.015408	25.144	0.039512	25.495	0.11547	25.144	0.0923	25.144	0.035047
25.552	0.07842	25.199	0.016605	25.199	0.04002	25.552	0.1155	25.199	0.0928	25.199	0.036905
25.608	0.07821	25.254	0.017054	25.254	0.040158	25.608	0.11565	25.254	0.0933	25.254	0.037155
25.664	0.07797	25.309	0.017653	25.309	0.040724	25.664	0.11459	25.309	0.0937	25.309	0.037775
25.72	0.07764	25.364	0.016998	25.364	0.041263	25.72	0.11351	25.364	0.0941	25.364	0.037571
25.776	0.07759	25.419	0.016873	25.419	0.040544	25.776	0.11337	25.419	0.0944	25.419	0.037042
25.832	0.07708	25.474	0.015655	25.474	0.041217	25.832	0.11259	25.474	0.0945	25.474	0.036109
25.888	0.07659	25.529	0.014656	25.529	0.040774	25.888	0.11355	25.529	0.0945	25.529	0.034414
25.944	0.07606	25.584	0.013554	25.584	0.040058	25.944	0.11255	25.584	0.0943	25.584	0.033142
26	0.07558	25.639	0.013424	25.639	0.039587	26	0.11246	25.639	0.094	25.639	0.032491
26.056	0.07495	25.694	0.0128	25.694	0.037914	26.056	0.11303	25.694	0.0935	25.694	0.030564
26.112	0.07435	25.749	0.012508	25.749	0.037746	26.112	0.11303	25.749	0.0928	25.749	0.03088
26.169	0.07368	25.804	0.012512	25.804	0.037175	26.169	0.1117	25.804	0.092	25.804	0.030751
26.225	0.07319	25.859	0.012488	25.859	0.036502	26.225	0.11176	25.859	0.0911	25.859	0.03085
26.281	0.072905	25.914	0.012563	25.914	0.036423	26.281	0.11214	25.914	0.0901	25.914	0.031092
26.337	0.072655	25.969	0.012965	25.969	0.03597	26.337	0.11197	25.969	0.0891	25.969	0.030884
26.393	0.072282	26.025	0.013221	26.025	0.03618	26.393	0.1134	26.025	0.088	26.025	0.031359
26.449	0.072208	26.08	0.013456	26.08	0.035386	26.449	0.1119	26.08	0.087	26.08	0.030929
26.505	0.072205	26.135	0.013697	26.135	0.036083	26.505	0.11252	26.135	0.086	26.135	0.03053
26.562	0.072136	26.19	0.013729	26.19	0.035781	26.562	0.11071	26.19	0.085	26.19	0.031335
26.618	0.072086	26.245	0.013495	26.245	0.034999	26.618	0.11171	26.245	0.0841	26.245	0.030785
26.674	0.072229	26.3	0.0132	26.3	0.035367	26.674	0.11161	26.3	0.0834	26.3	0.030845
26.73	0.072212	26.355	0.012835	26.355	0.035354	26.73	0.1116	26.355	0.0826	26.355	0.031311
26.786	0.07253	26.411	0.012833	26.411	0.03505	26.786	0.11096	26.411	0.082	26.411	0.030306
26.843	0.072637	26.466	0.012577	26.466	0.034934	26.843	0.11131	26.466	0.0816	26.466	0.030499
26.899	0.072839	26.521	0.012482	26.521	0.035178	26.899	0.11083	26.521	0.0813	26.521	0.029484
26.955	0.07288	26.576	0.012743	26.576	0.034544	26.955	0.11143	26.576	0.081	26.576	0.03088
27.011	0.072906	26.631	0.012644	26.631	0.035214	27.011	0.11061	26.631	0.0808	26.631	0.030441
27.067	0.072976	26.686	0.012519	26.686	0.03519	27.067	0.11132	26.686	0.0806	26.686	0.030545
27.124	0.07312	26.742	0.012465	26.742	0.035221	27.124	0.1103	26.742	0.0805	26.742	0.030195
27.18	0.07308	26.797	0.012476	26.797	0.035491	27.18	0.11002	26.797	0.0805	26.797	0.031249
27.236	0.0732	26.852	0.01215	26.852	0.034845	27.236	0.11085	26.852	0.0806	26.852	0.031191
27.292	0.07326	26.907	0.012365	26.907	0.034262	27.292	0.1116	26.907	0.0807	26.907	0.030625
27.349	0.07332	26.962	0.012104	26.962	0.035012	27.349	0.11127	26.962	0.0809	26.962	0.030541
27.405	0.0734	27.018	0.012403	27.018	0.034476	27.405	0.11096	27.018	0.0811	27.018	0.030781
27.461	0.07331	27.073	0.012557	27.073	0.034713	27.461	0.11147	27.073	0.0813	27.073	0.030699
27.517	0.07323	27.128	0.012104	27.128	0.034618	27.517	0.1108	27.128	0.0815	27.128	0.030669
27.574	0.07338	27.183	0.0121	27.183	0.034336	27.574	0.11056	27.183	0.0817	27.183	0.030223
27.63	0.07335	27.239	0.012149	27.239	0.034847	27.63	0.1119	27.239	0.0819	27.239	0.030471
27.686	0.0732	27.294	0.012038	27.294	0.034049	27.686	0.11111	27.294	0.082	27.294	0.030082
27.743	0.07306	27.349	0.012213	27.349	0.034353	27.743	0.11092	27.349	0.0822	27.349	0.029452
27.799	0.07312	27.404	0.012409	27.404	0.03428	27.799	0.10989	27.404	0.0822	27.404	0.030553
27.855	0.07303	27.46	0.012353	27.46	0.033987	27.855	0.11142	27.46	0.0823	27.46	0.030687
27.912	0.07302	27.515	0.01206	27.515	0.034448	27.912	0.11151	27.515	0.0823	27.515	0.03061
27.968	0.072947	27.57	0.012155	27.57	0.034499	27.968	0.1098	27.57	0.0824	27.57	0.029738
28.024	0.07303	27.625	0.012475	27.625	0.034198	28.024	0.11025	27.625	0.0823	27.625	0.03094
28.081	0.07323	27.681	0.012318	27.681	0.034268	28.081	0.11079	27.681	0.082	27.681	0.030201
28.137	0.07328	27.736	0.0121	27.736	0.034063	28.137	0.11072	27.736	0.0817	27.736	0.030847
28.193	0.07343	27.791	0.012518	27.791	0.034414	28.193	0.11078	27.791	0.0815	27.791	0.031168
28.25	0.07343	27.847	0.013112	27.847	0.03414	28.25	0.11031	27.847	0.0813	27.847	0.031231
28.306	0.07366	27.902	0.012545	27.902	0.033858	28.306	0.11032	27.902	0.0812	27.902	0.031399
28.363	0.07373	27.957	0.012913	27.957	0.034419	28.363	0.11	27.957	0.0812	27.957	0.031155
28.419	0.07397	28.013	0.012722	28.013	0.034636	28.419	0.1116	28.013	0.0812	28.013	0.03108
28.475	0.07398	28.068	0.012807	28.068	0.034464	28.475	0.10962	28.068	0.0812	28.068	0.030989
28.532	0.07396	28.124	0.012839	28.124	0.034632	28.532	0.11094	28.123	0.0813	28.124	0.031574
28.588	0.07404	28.179	0.013379	28.179	0.034818	28.588	0.11077	28.179	0.0814	28.179	0.032594
28.645	0.07403	28.234	0.013377	28.234	0.034611	28.645	0.11047	28.234	0.0815	28.234	0.031392
28.701	0.07409	28.289	0.013136	28.289	0.034589	28.701	0.11025	28.29	0.0816	28.289	0.031682
28.757	0.07416	28.345	0.013181	28.345	0.034724	28.757	0.11195	28.345	0.0818	28.345	0.031555
28.814	0.07435	28.4	0.013193	28.4	0.034743	28.814	0.11077	28.4	0.0819	28.4	0.03201
28.87	0.07441	28.456	0.012899	28.456	0.035212	28.87	0.11025	28.456	0.0821	28.456	0.032074
28.927	0.07449	28.511	0.01308	28.511	0.034797	28.927	0.11135	28.511	0.0821	28.511	0.032108
28.983	0.07428	28.566	0.013415	28.566	0.034847	28.983	0.11037	28.566	0.0822	28.566	0.033705
29.04	0.07428	28.622	0.013905	28.622	0.034546	29.04	0.10983	28.622	0.0821	28.622	0.033099
29.096	0.07434	28.677	0.014042	28.677	0.034499	29.096	0.11071	28.677	0.082	28.677	0.033178
29.153	0.07434	28.733	0.014274	28.733	0.035951	29.153	0.10998	28.733	0.0818	28.733	0.032075
29.209	0.07435	28.788	0.013396	28.788	0.035238	29.209	0.11003	28.788	0.0814	28.788	0.032604
29.266	0.07433	28.844	0.013271	28.844	0.035179	29.266	0.10887	28.844	0.0811	28.844	0.033154
29.322	0.07418	28.899	0.013289	28.899	0.03525	29.322	0.10964	28.899	0.0808	28.899	0.032361
29.379	0.07408	28.955	0.013246	28.955	0.035222	29.379	0.10964	28.954	0.0806	28.955	0.030236
29.435	0.07435	29.01	0.012857	29.01	0.035321	29.435	0.10889	29.01	0.0804	29.01	0.03277
29.492	0.07434	29.065	0.012365	29.065	0.034298	29.492	0.11003	29.065	0.0803	29.065	0.031818
29.548	0.07443	29.121	0.012606	29.121	0.034129	29.548	0.11027	29.121	0.0803	29.121	0.031795
29.605	0.07453	29.176	0.012447	29.176	0.034472	29.605	0.10939	29.176	0.0803	29.176	0.03057
29.661	0.07463	29.232	0.012366	29.232	0.034355	29.661	0.10974	29.232	0.0804	29.232	0.031155
29.718	0.07486	29.287	0.012156	29.287	0.034781	29.718	0.11007	29.287	0.0806	29.287	0.030672
29.775	0.07474	29.343	0.012555	29.343	0.034724	29.775	0.10966	29.343	0.0809	29.343	0.031278
29.831	0.07497	29.398	0.012444	29.398	0.034953	29.831	0.11062	29.398	0.0812	29.398	0.032342
29.888	0.075	29.454	0.012872	29.454	0.034839	29.888	0.10907	29.454	0.0815	29.454	0.031952
29.944	0.07501	29.509	0.013221	29.509	0.034902	29.944	0.10984	29.509	0.0817	29.509	0.032364
30.001	0.07501	29.565	0.013668	29.565	0.034654	30.001	0.10972	29.565	0.0819	29.565	0.033008
30.058	0.0749	29.62	0.013794	29.62	0.035235	30.058	0.11052	29.62	0.082	29.62	0.032407
30.114	0.07456	29.676	0.014443	29.676	0.035898	30.114	0.10856	29.676	0.082	29.676	0.033394
30.171	0.07436	29.732	0.014932	29.732	0.035081	30.171	0.10981	29.732	0.0821	29.732	0.033549
30.227	0.0742	29.787	0.015193	29.787	0.03492	30.227	0.10896	29.787	0.0821	29.787	0.03377
30.284	0.07403	29.843	0.015121	29.843	0.035222	30.284	0.10864	29.843	0.0819	29.843	0.034306
30.341	0.07379	29.898	0.01503	29.898	0.035624	30.341	0.10823	29.898	0.0817	29.898	0.0346
30.397	0.07369	29.954	0.014534	29.954	0.035487	30.397	0.10975	29.954	0.0815	29.954	0.033477
30.454	0.0734	30.01	0.014527	30.01	0.035821	30.454	0.10873	30.01	0.0814	30.01	0.033708
30.51	0.07344	30.065	0.014063	30.065	0.034964	30.51	0.10869	30.065	0.0813	30.065	0.033853
30.567	0.07357	30.121	0.013953	30.121	0.03554	30.567	0.10861	30.121	0.0811	30.121	0.033193
30.624	0.07348	30.176	0.013969	30.176	0.034621	30.624	0.10827	30.176	0.081	30.176	0.03238
30.681	0.07357	30.232	0.013357	30.232	0.034866	30.681	0.10871	30.232	0.0808	30.232	0.031747
30.737	0.07392	30.288	0.013674	30.288	0.03494	30.737	0.1086	30.288	0.0806	30.288	0.0335
30.794	0.07402	30.343	0.013918	30.343	0.034916	30.794	0.10871	30.343	0.0805	30.343	0.032683
30.851	0.07402	30.399	0.013299	30.399	0.034269	30.851	0.10811	30.399	0.0805	30.399	0.032902
30.907	0.07395	30.455	0.013467	30.455	0.034634	30.907	0.10818	30.454	0.0803	30.455	0.033203
30.964	0.07418	30.51	0.013235	30.51	0.034512	30.964	0.10816	30.51	0.0802	30.51	0.032263
31.021	0.07415	30.566	0.013275	30.566	0.034125	31.021	0.10677	30.566	0.08	30.566	0.031998
31.078	0.07446	30.621	0.012835	30.621	0.03422	31.078	0.10783	30.621	0.0796	30.621	0.032528
31.134	0.07457	30.677	0.013123	30.677	0.033502	31.134	0.10738	30.677	0.0794	30.677	0.032764
31.191	0.07426	30.733	0.012957	30.733	0.033816	31.191	0.10907	30.733	0.0791	30.733	0.032543
31.248	0.07405	30.788	0.012392	30.788	0.033966	31.248	0.10845	30.788	0.0789	30.788	0.032868
31.305	0.0739	30.844	0.013121	30.844	0.034499	31.305	0.10844	30.844	0.0789	30.844	0.031838
31.361	0.07374	30.9	0.013236	30.9	0.034425	31.361	0.10771	30.9	0.0788	30.9	0.032796
31.418	0.07351	30.956	0.013309	30.956	0.034697	31.418	0.10815	30.956	0.0788	30.956	0.033336
31.475	0.0732	31.011	0.014071	31.011	0.033692	31.475	0.10862	31.011	0.0788	31.011	0.033004
31.532	0.07311	31.067	0.013774	31.067	0.034627	31.532	0.10677	31.067	0.079	31.067	0.032881
31.589	0.07312	31.123	0.013716	31.123	0.03365	31.589	0.10749	31.123	0.0791	31.123	0.03424
31.646	0.072939	31.178	0.013885	31.178	0.034568	31.646	0.10716	31.178	0.0793	31.178	0.033684
31.702	0.072663	31.234	0.013805	31.234	0.033898	31.702	0.10665	31.234	0.0795	31.234	0.033102
31.759	0.072398	31.29	0.013589	31.29	0.034733	31.759	0.10759	31.29	0.0796	31.29	0.034179
31.816	0.072482	31.346	0.013302	31.346	0.033643	31.816	0.10756	31.346	0.0798	31.346	0.033166
31.873	0.07267	31.402	0.013355	31.402	0.033533	31.873	0.10699	31.402	0.0799	31.402	0.033712
31.93	0.072595	31.457	0.013909	31.457	0.033998	31.93	0.10763	31.457	0.0801	31.457	0.034236
31.987	0.072809	31.513	0.01306	31.513	0.034407	31.987	0.10654	31.513	0.0802	31.513	0.032872
32.043	0.072915	31.569	0.012507	31.569	0.033628	32.043	0.10805	31.569	0.0801	31.569	0.033259
32.1	0.07307	31.625	0.013065	31.625	0.033111	32.1	0.10739	31.625	0.0801	31.625	0.032402
32.157	0.07325	31.681	0.012766	31.681	0.033739	32.157	0.10835	31.681	0.08	31.681	0.033335
32.214	0.0735	31.736	0.013119	31.736	0.033934	32.214	0.10626	31.736	0.0799	31.736	0.032565
32.271	0.07354	31.792	0.013776	31.792	0.033816	32.271	0.10786	31.792	0.08	31.792	0.033202
32.328	0.07362	31.848	0.013591	31.848	0.033819	32.328	0.10789	31.848	0.08	31.848	0.033659
32.385	0.07394	31.904	0.013679	31.904	0.033811	32.385	0.10761	31.904	0.0801	31.904	0.033015
32.442	0.07415	31.96	0.014178	31.96	0.033764	32.442	0.10618	31.96	0.0802	31.96	0.032714
32.499	0.07416	32.016	0.015058	32.016	0.034058	32.499	0.10713	32.016	0.0804	32.016	0.033301
32.556	0.07429	32.071	0.01497	32.071	0.034294	32.556	0.10701	32.072	0.0804	32.071	0.034468
32.613	0.07439	32.127	0.015607	32.127	0.034016	32.613	0.10631	32.127	0.0805	32.127	0.03348
32.67	0.07451	32.183	0.01637	32.183	0.035303	32.67	0.10639	32.183	0.0806	32.183	0.034357
32.727	0.07473	32.239	0.015684	32.239	0.034948	32.727	0.1073	32.239	0.0807	32.239	0.036165
32.784	0.07427	32.295	0.015832	32.295	0.034868	32.784	0.10692	32.295	0.0808	32.295	0.033715
32.841	0.07434	32.351	0.015727	32.351	0.034387	32.841	0.10578	32.351	0.0809	32.351	0.034248
32.897	0.07437	32.407	0.015868	32.407	0.035336	32.897	0.10708	32.407	0.0809	32.407	0.035807
32.955	0.07461	32.463	0.015536	32.463	0.035378	32.955	0.1054	32.463	0.0809	32.463	0.036736
33.012	0.0746	32.519	0.014862	32.519	0.03485	33.012	0.10688	32.519	0.0808	32.519	0.035672
33.069	0.07468	32.575	0.015347	32.575	0.034801	33.069	0.1067	32.575	0.0805	32.575	0.03517
33.126	0.0748	32.631	0.01466	32.631	0.035215	33.126	0.10577	32.631	0.0801	32.631	0.033334
33.183	0.07475	32.687	0.014355	32.687	0.034414	33.183	0.10563	32.687	0.0796	32.687	0.034859
33.24	0.07463	32.743	0.014211	32.743	0.033977	33.24	0.10562	32.742	0.0792	32.743	0.033818
33.297	0.0745	32.798	0.013532	32.798	0.034337	33.297	0.10539	32.798	0.0786	32.798	0.033434
33.354	0.07473	32.854	0.013039	32.854	0.034553	33.354	0.10292	32.854	0.0783	32.854	0.033984
33.411	0.07471	32.91	0.013122	32.91	0.034658	33.411	0.10522	32.91	0.0782	32.91	0.033205
33.468	0.07479	32.966	0.013316	32.966	0.033933	33.468	0.10531	32.966	0.078	32.966	0.032796
33.525	0.07489	33.022	0.012708	33.022	0.033413	33.525	0.10413	33.022	0.078	33.022	0.030967
33.582	0.07501	33.078	0.01325	33.078	0.034832	33.582	0.10613	33.078	0.0783	33.078	0.031588
33.639	0.07488	33.134	0.013254	33.134	0.033837	33.639	0.10635	33.134	0.0783	33.134	0.033307
33.696	0.0749	33.19	0.014102	33.19	0.034393	33.696	0.10502	33.19	0.0785	33.19	0.033297
33.754	0.07468	33.246	0.014117	33.246	0.034546	33.754	0.10428	33.246	0.0788	33.246	0.033422
33.811	0.07471	33.303	0.015185	33.303	0.033961	33.811	0.10286	33.303	0.0792	33.303	0.035004
33.868	0.07468	33.359	0.01458	33.359	0.033639	33.868	0.10559	33.359	0.0796	33.359	0.034866
33.925	0.07465	33.415	0.015668	33.415	0.034145	33.925	0.10431	33.415	0.0798	33.415	0.033142
33.982	0.07467	33.471	0.015185	33.471	0.03402	33.982	0.10515	33.471	0.0802	33.471	0.034157
34.039	0.07441	33.527	0.016096	33.527	0.034149	34.039	0.10512	33.527	0.0804	33.527	0.035258
34.097	0.0742	33.583	0.014935	33.583	0.034891	34.097	0.10423	33.583	0.0804	33.583	0.03437
34.154	0.07389	33.639	0.015192	33.639	0.034395	34.154	0.10432	33.639	0.0802	33.639	0.034168
34.211	0.07384	33.695	0.014865	33.695	0.033004	34.211	0.10336	33.695	0.0801	33.695	0.034574
34.268	0.07354	33.751	0.013833	33.751	0.034348	34.268	0.1069	33.751	0.0798	33.751	0.033157
34.325	0.0734	33.807	0.013994	33.807	0.034053	34.325	0.1031	33.807	0.0797	33.807	0.032855
34.383	0.07309	33.863	0.013592	33.863	0.03386	34.383	0.1046	33.863	0.0795	33.863	0.032089
34.44	0.072952	33.92	0.013657	33.92	0.033006	34.44	0.10495	33.92	0.0795	33.92	0.032381
34.497	0.072981	33.976	0.013737	33.976	0.033232	34.497	0.10497	33.976	0.0795	33.976	0.031527
34.554	0.07277	34.032	0.012964	34.032	0.033667	34.554	0.10386	34.032	0.0797	34.032	0.033147
34.612	0.07323	34.088	0.013988	34.088	0.033475	34.612	0.10431	34.088	0.0797	34.088	0.03233
34.669	0.07332	34.144	0.013446	34.144	0.032904	34.669	0.1045	34.144	0.0798	34.144	0.03153
34.726	0.07343	34.2	0.013081	34.2	0.032446	34.726	0.10403	34.2	0.0798	34.2	0.032025
34.783	0.07364	34.257	0.013384	34.257	0.032554	34.783	0.10561	34.257	0.0796	34.257	0.03272
34.841	0.07332	34.313	0.013833	34.313	0.033502	34.841	0.1042	34.313	0.0798	34.313	0.032956
34.898	0.07355	34.369	0.013901	34.369	0.033627	34.898	0.10638	34.369	0.08	34.369	0.032339
34.955	0.07398	34.425	0.014567	34.425	0.032346	34.955	0.10277	34.425	0.0798	34.425	0.033834
35.013	0.07412	34.481	0.014712	34.481	0.034161	35.013	0.10427	34.481	0.0796	34.481	0.033361
35.07	0.07423	34.538	0.015583	34.538	0.033736	35.07	0.10295	34.538	0.0793	34.538	0.034583
35.127	0.07395	34.594	0.016123	34.594	0.033519	35.127	0.10423	34.594	0.0792	34.594	0.035161
35.185	0.07372	34.65	0.016611	34.65	0.03457	35.185	0.10626	34.65	0.0788	34.65	0.03291
35.242	0.07408	34.706	0.016737	34.706	0.033556	35.242	0.10407	34.706	0.0786	34.706	0.03577
35.299	0.07429	34.763	0.01704	34.763	0.03409	35.299	0.10399	34.763	0.0785	34.763	0.035728
35.357	0.0741	34.819	0.016558	34.819	0.034624	35.357	0.10161	34.819	0.0786	34.819	0.03498
35.414	0.07387	34.875	0.016238	34.875	0.033722	35.414	0.10405	34.875	0.0786	34.875	0.03591
35.472	0.07419	34.931	0.015825	34.931	0.034645	35.472	0.10333	34.931	0.0788	34.931	0.033924
35.529	0.07427	34.988	0.016375	34.988	0.03326	35.529	0.10482	34.988	0.0789	34.988	0.034556
35.586	0.07419	35.044	0.015459	35.044	0.033466	35.586	0.10312	35.044	0.0791	35.044	0.037215
35.644	0.07416	35.1	0.016047	35.1	0.034518	35.644	0.10106	35.1	0.0792	35.1	0.037872
35.701	0.07437	35.157	0.014949	35.157	0.034594	35.701	0.10203	35.157	0.0795	35.157	0.034064
35.759	0.07463	35.213	0.016209	35.213	0.03536	35.759	0.10315	35.213	0.0796	35.213	0.034197
35.816	0.07458	35.269	0.01575	35.269	0.033453	35.816	0.10198	35.269	0.0799	35.269	0.034317
35.874	0.0746	35.326	0.014139	35.326	0.034383	35.874	0.10455	35.326	0.08	35.326	0.033207
35.931	0.07431	35.382	0.015382	35.382	0.033267	35.931	0.10314	35.382	0.0801	35.382	0.033521
35.988	0.07386	35.438	0.01484	35.438	0.033541	35.988	0.10168	35.439	0.0804	35.438	0.034314
36.046	0.07391	35.495	0.0147	35.495	0.033074	36.046	0.10091	35.495	0.0807	35.495	0.033002
36.104	0.0735	35.551	0.015026	35.551	0.033249	36.104	0.10344	35.551	0.0808	35.551	0.03255
36.161	0.07308	35.608	0.013444	35.608	0.032056	36.161	0.10225	35.608	0.081	35.608	0.033521
36.218	0.072499	35.664	0.013091	35.664	0.03147	36.218	0.10235	35.664	0.0809	35.664	0.032882
36.276	0.07182	35.72	0.012571	35.72	0.033295	36.276	0.1023	35.72	0.0807	35.72	0.03026
36.333	0.071702	35.777	0.012484	35.777	0.03249	36.333	0.10024	35.777	0.0805	35.777	0.031517
36.391	0.07161	35.833	0.012933	35.833	0.032518	36.391	0.10082	35.833	0.0804	35.833	0.033925
36.449	0.071159	35.89	0.012835	35.89	0.032316	36.449	0.10204	35.89	0.0804	35.89	0.032501
36.506	0.07073	35.946	0.01344	35.946	0.031053	36.506	0.099374	35.946	0.0802	35.946	0.033063
36.564	0.07088	36.003	0.012382	36.003	0.031134	36.564	0.10356	36.003	0.0799	36.003	0.030828
36.621	0.071548	36.059	0.013171	36.059	0.031387	36.621	0.10359	36.059	0.0797	36.059	0.031628
36.679	0.071839	36.116	0.011491	36.116	0.032593	36.679	0.10445	36.116	0.0794	36.116	0.032469
36.736	0.072021	36.172	0.011973	36.172	0.03079	36.736	0.10146	36.172	0.0792	36.172	0.031707
36.794	0.072236	36.229	0.014294	36.229	0.031929	36.794	0.10483	36.229	0.079	36.229	0.032723
36.852	0.072748	36.285	0.012938	36.285	0.032763	36.852	0.10359	36.285	0.0791	36.285	0.033085
36.91	0.07348	36.341	0.012538	36.341	0.032949	36.91	0.1011	36.342	0.0791	36.341	0.029533
36.967	0.07398	36.398	0.012719	36.398	0.031264	36.967	0.097676	36.398	0.0794	36.398	0.032383
37.025	0.0737	36.455	0.013245	36.455	0.033844	37.025	0.099806	36.455	0.0797	36.455	0.03272
37.082	0.07404	36.511	0.012457	36.511	0.031922	37.082	0.09843	36.511	0.0798	36.511	0.031757
37.14	0.07439	36.568	0.014046	36.568	0.030305	37.14	0.10255	36.568	0.0797	36.568	0.032556
37.198	0.07421	36.624	0.012772	36.624	0.032898	37.198	0.099274	36.624	0.0799	36.624	0.031846
37.256	0.07422	36.681	0.012627	36.681	0.030063	37.256	0.10501	36.681	0.0799	36.681	0.034685
37.313	0.07399	36.737	0.013888	36.737	0.031597	37.313	0.10389	36.737	0.0797	36.737	0.031851
37.371	0.07373	36.794	0.014646	36.794	0.031389	37.371	0.10368	36.794	0.0794	36.794	0.036236
37.429	0.07324	36.85	0.013584	36.85	0.032153	37.429	0.10045	36.85	0.0792	36.85	0.033423
37.486	0.07335	36.907	0.013941	36.907	0.032302	37.486	0.10046	36.907	0.0793	36.907	0.033629
37.544	0.072661	36.964	0.014008	36.964	0.032399	37.544	0.097679	36.964	0.0795	36.964	0.03161
37.602	0.07259	37.02	0.01367	37.02	0.032397	37.602	0.10149	37.02	0.0797	37.02	0.034287
37.66	0.072184	37.077	0.013745	37.077	0.031624	37.66	0.10014	37.077	0.0798	37.077	0.03407
37.717	0.072676	37.134	0.01524	37.134	0.030955	37.717	0.1006	37.134	0.0799	37.134	0.033489
37.775	0.07318	37.19	0.014236	37.19	0.032619	37.775	0.1012	37.19	0.0802	37.19	0.03127
37.833	0.07346	37.247	0.014271	37.247	0.032917	37.833	0.10139	37.247	0.0802	37.247	0.034043
37.891	0.07376	37.304	0.015385	37.304	0.030655	37.891	0.099791	37.304	0.0804	37.304	0.031057
37.949	0.07355	37.36	0.015258	37.36	0.031446	37.949	0.10036	37.36	0.0807	37.36	0.034422
38.006	0.0741	37.417	0.015888	37.417	0.032599	38.006	0.1014	37.417	0.081	37.417	0.034128
38.064	0.07479	37.474	0.015804	37.474	0.031454	38.064	0.098608	37.474	0.0815	37.474	0.032655
38.122	0.07492	37.53	0.016105	37.53	0.032951	38.122	0.10109	37.53	0.0819	37.53	0.039425
38.18	0.07488	37.587	0.015305	37.587	0.033555	38.18	0.098751	37.587	0.0819	37.587	0.030341
38.238	0.07563	37.644	0.016838	37.644	0.033982	38.238	0.09877	37.644	0.0813	37.644	0.031223
38.296	0.0757	37.701	0.015657	37.701	0.033719	38.296	0.10096	37.701	0.0807	37.701	0.035206
38.354	0.07614	37.757	0.014249	37.757	0.031361	38.354	0.098543	37.757	0.0806	37.757	0.036247
38.411	0.07626	37.814	0.014473	37.814	0.032752	38.411	0.10055	37.814	0.0804	37.814	0.034706
38.469	0.07604	37.871	0.014994	37.871	0.034915	38.469	0.099282	37.871	0.0797	37.871	0.035076
38.527	0.07552	37.928	0.014373	37.928	0.034144	38.527	0.10049	37.928	0.0795	37.928	0.034114
38.585	0.07565	37.984	0.013773	37.984	0.034895	38.585	0.10283	37.984	0.0797	37.984	0.032371
38.643	0.07585	38.041	0.015313	38.041	0.031941	38.643	0.096016	38.041	0.0805	38.041	0.033945
38.701	0.07514	38.098	0.013833	38.098	0.029769	38.701	0.099094	38.098	0.0817	38.098	0.034722
38.759	0.07536	38.155	0.01585	38.155	0.030853	38.759	0.093985	38.155	0.0833	38.155	0.03071
38.817	0.07493	38.212	0.012892	38.212	0.03154	38.817	0.10039	38.212	0.085	38.212	0.032187
38.875	0.07512	38.268	0.015536	38.268	0.031457	38.875	0.094839	38.268	0.087	38.268	0.033818
38.933	0.07393	38.325	0.013318	38.325	0.030882	38.933	0.099396	38.325	0.0889	38.325	0.033549
38.991	0.07311	38.382	0.013328	38.382	0.032747	38.991	0.10035	38.382	0.0908	38.382	0.031267
39.049	0.071578	38.439	0.014414	38.439	0.02838	39.049	0.10082	38.439	0.0927	38.439	0.035161
39.107	0.0705	38.496	0.014376	38.496	0.03244	39.107	0.10301	38.496	0.0943	38.496	0.034409
39.165	0.0707	38.553	0.012869	38.553	0.032963	39.165	0.099278	38.553	0.0954	38.553	0.035081
39.223	0.07097	38.61	0.012504	38.61	0.030392	39.223	0.093211	38.61	0.096	38.61	0.033553
39.281	0.07085	38.667	0.014309	38.667	0.033049	39.281	0.099514	38.667	0.096	38.667	0.029636
39.339	0.07073	38.723	0.01287	38.723	0.030726	39.339	0.10034	38.723	0.0953	38.723	0.03214
39.397	0.071517	38.78	0.01307	38.78	0.031551	39.397	0.10171	38.78	0.094	38.78	0.033226
39.455	0.071962	38.837	0.014932	38.837	0.031413	39.455	0.098672	38.837	0.0925	38.837	0.029695
39.513	0.071997	38.894	0.014477	38.894	0.029008	39.513	0.099606	38.894	0.0908	38.894	0.032985
39.571	0.07036	38.951	0.011455	38.951	0.030884	39.571	0.096756	38.951	0.0885	38.951	0.032344
39.629	0.071411	39.008	0.013572	39.008	0.030249	39.629	0.098259	39.008	0.086	39.008	0.030483
39.687	0.07277	39.065	0.014495	39.065	0.030745	39.687	0.098633	39.065	0.0847	39.065	0.028704
39.746	0.07444	39.122	0.014892	39.122	0.031648	39.746	0.091926	39.122	0.0836	39.122	0.03351
39.804	0.07642	39.179	0.012795	39.179	0.034794	39.804	0.10067	39.179	0.0826	39.179	0.031235
39.862	0.0787	39.236	0.015891	39.236	0.034998	39.862	0.099617	39.236	0.0816	39.236	0.029388
39.92	0.0813	39.293	0.012812	39.293	0.031074	39.92	0.0966	39.293	0.0807	39.293	0.032918
39.978	0.0842	39.35	0.014483	39.35	0.031162	39.978	0.0997	39.35	0.0799	39.35	0.03335
40.036	0.08742	39.407	0.011357	39.407	0.033694	40.036	0.095204	39.407	0.0792	39.407	0.036721
40.095	0.09094	39.464	0.01501	39.464	0.032089	40.095	0.10945	39.464	0.0785	39.464	0.032043
40.153	0.09477	39.521	0.011841	39.521	0.028519	40.153	0.099481	39.521	0.078	39.521	0.031348
		39.578	0.015165	39.578	0.032243			39.578	0.0775	39.578	0.032686
		39.635	0.013984	39.635	0.032902			39.635	2.1953e-06	39.635	0.037551
		39.693	0.013618	39.693	0.030343			39.693	-5.3332e-05	39.693	0.032232
		39.75	0.0095936	39.75	0.027006			39.75	-0.00010276	39.75	0.03772
		39.807	0.017277	39.807	0.027038					39.807	0.035074

## Sheet: Raman
	GdBTC	BSA@GdBTC	LC@GdBTC	TbBTC	BSA@TbBTC	LC@TbBTC
3199.3	141.93	568.31	4093	70.764	1652.5	2620.3
3198.6	15.281	448.75	4049.7	-16.335	1485.9	2533.6
3197.9	-2.6237	503.17	4015.8	12.554	1551.2	2482.8
3197.2	4.8427	466.94	3990.4	-31.054	1478.9	2460.5
3196.5	8.6789	521.31	3972.7	-27.545	1479	2459.5
3195.8	-9.2263	510.43	3961.6	-2.3047	1468.2	2472.5
3195.1	19.959	550.25	3956.2	-6.0541	1490	2486.3
3194.4	20.158	492.27	3955.8	33.652	1511.8	2504.3
3193.7	-33.959	492.22	3959.3	0.92328	1526.4	2514.7
3193	-12.037	488.55	3966	-2.8359	1468.5	2521.8
3192.3	-11.843	499.34	3974.7	11.501	1472.2	2517.5
3191.6	-0.79563	531.82	3990.1	11.353	1490.4	2514.3
3190.9	-7.8475	517.25	3998.1	-24.981	1501.3	2506.2
3190.2	-18.518	484.58	4001.6	11.047	1526.7	2505.6
3189.5	-25.57	462.77	4001	-10.813	1515.9	2498.8
3188.8	-10.926	502.42	3999.5	-10.971	1479.8	2485.5
3188.1	18.172	509.51	4000	10.562	1519.6	2473.1
3187.4	11.106	502.12	4006.3	-11.296	1469	2477.4
3186.7	4.0394	520.03	4007.5	21.065	1537.7	2477.7
3186	-3.0278	534.3	4001.8	2.8202	1505.2	2481.7
3185.3	-6.4829	512.43	3985.4	9.87	1512.4	2478.4
3184.6	8.1224	486.95	3982	16.914	1469.1	2485.9
3183.8	4.6603	479.52	3978.9	-8.5539	1523.3	2494.6
3183.1	-9.6371	544.3	3974.8	20.151	1505.2	2502
3182.4	4.9513	529.62	3969.6	-12.535	1505.3	2503
3181.7	30.361	496.88	3969.7	5.3244	1490.8	2508.1
3181	-12.816	467.76	3974.7	-5.6985	1483.6	2503.4
3180.3	-5.4611	492.76	3973	-9.5037	1480	2505.9
3179.6	1.8883	503.32	3979.8	-42.174	1512.4	2499.6
3178.9	-30.448	438.11	3980.3	-24.333	1498	2506
3178.2	-1.463	499.14	3977.9	-38.962	1512.4	2505
3177.5	-12.157	531.29	3982.6	7.7138	1516	2506.8
3176.8	-15.639	512.95	3984.6	32.738	1490.7	2511.6
3176.1	-11.914	498.21	3988.3	10.889	1487	2509.3
3175.4	-11.797	494.27	3988.9	10.67	1472.6	2506.8
3174.7	13.541	508.35	3996.1	-47.206	1508.6	2508.7
3173.9	6.4421	511.6	3999.7	17.428	1508.5	2504.2
3173.2	-36.677	482.43	4001.6	-29.627	1508.5	2505.7
3172.5	13.853	536.09	3999.3	16.968	1540.8	2507.3
3171.8	3.1492	420.48	4000.3	-8.4709	1494	2508.1
3171.1	-3.9532	484.91	3996.6	-1.5027	1479.5	2500.7
3170.4	-0.2573	513.32	3992.4	-34.134	1515.4	2498.3
3169.7	-21.757	509.32	3991.5	19.617	1486.6	2508.3
3169	10.721	476.53	3997.1	33.765	1508.1	2493.1
3168.3	10.807	533.68	3999.7	-20.448	1475.6	2494.7
3167.6	21.681	497.28	4005.9	18.876	1515.1	2499.6
3166.9	-17.799	471.67	4009.2	-10.146	1507.8	2508.8
3166.2	-3.3328	478.43	4009.8	11.179	1497	2519.1
3165.4	-17.634	495.96	4009.2	-7.0507	1504	2514.9
3164.7	-17.556	491.91	4010.5	39.422	1518.3	2508.1
3164	-24.667	487.86	4007.3	-3.9674	1511	2507.7
3163.3	-3.0336	534.1	4003.7	-15.006	1482.2	2504.9
3162.6	-28.112	515.65	4006.3	-8.0805	1460.5	2499
3161.9	7.8769	533.12	4007.2	-4.7517	1507.1	2482.7
3161.2	-6.4255	518.26	4006.5	30.894	1456.7	2474.2
3160.5	-20.725	517.76	4009.3	-1.6948	1499.7	2476.6
3159.8	-6.303	499.3	4001.2	-19.914	1521.1	2498.8
3159.1	-17.013	516.73	4000.8	8.5294	1488.7	2517.6
3158.3	11.753	509.03	3995.4	1.0754	1524.5	2515.4
3157.6	1.0397	472.63	4000.6	11.562	1477.7	2526.5
3156.9	33.375	490.04	4002.7	4.106	1531.4	2530.2
3156.2	15.484	485.91	3999.1	3.8238	1509.7	2532.1
3155.5	26.285	521.23	4006.5	7.1258	1534.7	2523.2
3154.8	1.2268	484.82	4013.4	6.8388	1487.9	2513.8
3154.1	8.4376	491.44	4019.8	2.9657	1512.9	2491.7
3153.4	-2.2764	440.7	4021.6	-15.245	1519.9	2488.6
3152.7	1.345	479.56	4026.1	-33.45	1480.3	2491.2
3151.9	-5.7852	482.57	4027.1	-40.903	1494.5	2493.9
3151.2	15.742	485.57	4029.4	-19.698	1505.1	2488.2
3150.5	12.189	506.48	4027.5	-9.2467	1512.1	2494.1
3149.8	19.379	470.08	4023.8	-2.3821	1511.9	2490.3
3149.1	-34.3	537.51	4018.8	25.959	1486.7	2496.5
3148.4	12.266	511.84	4016.2	14.913	1497.3	2497.3
3147.7	-12.764	507.65	4009.3	-17.604	1515	2503.4
3147	12.308	510.62	4009.9	-21.485	1504.1	2508.7
3146.2	-16.295	502.84	4010	17.565	1475.3	2510.8
3145.5	15.919	480.76	3999.6	27.983	1493	2509.7
3144.8	1.6279	523.05	3995.3	31.243	1514.3	2511.1
3144.1	-30.539	479.5	3995.3	16.622	1510.5	2515.5
3143.4	-16.22	471.72	3995.4	5.5792	1521.1	2506.1
3142.7	-1.9078	485.38	3998.5	-16.185	1510.2	2490.7
3142	-5.4714	527.62	3994.9	-9.3524	1499.3	2487.2
3141.3	12.403	501.95	3998.1	-16.816	1481.2	2481.7
3140.5	-1.8825	504.87	4004.7	-38.569	1513.2	2486.1
3139.8	5.2663	529.21	4005.2	11.121	1480.8	2496.4
3139.1	40.98	489.26	4006.4	3.6519	1509.2	2499.6
3138.4	5.2691	467.17	4002.8	-7.3867	1459	2505.2
3137.7	26.688	541.47	3996.3	-29.132	1494.5	2510.8
3137	-12.581	483.67	3996.4	31.221	1522.9	2515.7
3136.3	15.967	529.39	3991.1	-33.35	1487	2504.1
3135.5	33.8	500.16	3990	-8.6999	1440.4	2496.3
3134.8	-26.857	478.06	3986.2	-1.8972	1483	2491.5
3134.1	-26.86	473.81	3983.4	4.9016	1522	2488.3
3133.4	-23.298	498.08	3977.2	8.13	1514.7	2491.7
3132.7	23.046	518.77	3980.9	29.183	1503.7	2499.1
3132	-5.4888	485.98	3983.2	-28.198	1475	2495.6
3131.2	30.14	495.97	3976	14.236	1485.5	2499
3130.5	12.302	498.83	3982.6	-39.561	1467.5	2504.2
3129.8	30.098	519.49	3983.2	-11.395	1499.3	2503.6
3129.1	-5.5468	511.65	3992.9	20.322	1531.1	2495.6
3128.4	12.243	507.36	4003.8	-22.766	1488.2	2492.7
3127.7	-5.5839	481.71	4007.8	5.3777	1523.5	2486.2
3127	29.998	480.99	4014.5	8.5878	1505.5	2502
3126.2	-16.305	494.51	4022.4	1.1169	1491	2507.9
3125.5	26.382	500.89	4018.5	0.76492	1501.5	2512.7
3124.8	5.0015	514.39	4019.6	-13.822	1511.9	2509.8
3124.1	-30.603	520.77	4014.3	14.288	1483.2	2512.9
3123.4	8.5024	498.68	4015.3	-7.4122	1493.7	2516.3
3122.7	8.4719	469.49	4014.6	-0.65458	1497	2522.5
3121.9	29.775	486.53	4015.5	-1.0123	1507.4	2512.7
3121.2	15.518	468.01	4016.1	16.404	1542.7	2503.1
3120.5	11.928	467.27	4015.3	-12.396	1514	2497.1
3119.8	1.2305	491.4	4015.5	19.23	1538.7	2497.6
3119.1	40.281	455.11	4010.3	11.757	1470.9	2491.6
3118.3	11.817	511.21	4017.8	-9.9246	1467.1	2491.5
3117.6	-13.086	478.48	4012	-6.7361	1495.3	2491.9
3116.9	18.841	513.24	4007.1	-35.512	1519.9	2488.3
3116.2	-16.709	494.72	4011.5	3.1842	1519.6	2489.1
3115.5	18.755	486.86	4010	-7.8351	1505.2	2495
3114.8	36.457	500.29	4022	-11.753	1501.3	2491.3
3114	25.762	510.17	4020.4	2.0727	1536.6	2496.3
3113.3	-6.2186	484.56	4021.1	30.085	1522.1	2497.9
3112.6	-13.357	490.89	4020.1	-2.2211	1486.4	2498.3
3111.9	-9.8524	486.57	4015.1	-13.236	1479	2520.1
3111.2	18.473	503.53	4010.1	7.6685	1478.8	2534.7
3110.4	25.514	506.29	4012.8	21.473	1460.8	2540.6
3109.7	7.7368	505.51	4016.7	10.456	1517.2	2541.9
3109	11.231	472.84	4016	-11.19	1513.4	2543.9
3108.3	-34.888	528.76	4010.5	-11.569	1488.4	2542.7
3107.6	-17.218	520.89	4018.5	5.7677	1530.6	2537.9
3106.8	18.158	513.01	4020.3	-22.955	1505.5	2536.4
3106.1	11.019	494.52	4014.1	-23.334	1484	2534.6
3105.4	14.505	532.68	4007.8	8.1563	1480.2	2526.2
3104.7	39.232	567.3	4003.8	21.932	1547.2	2530.3
3104	35.63	474.46	4001.7	10.922	1515.1	2527.6
3103.2	0.1763	526.76	3993.7	-0.085244	1521.9	2523.4
3102.5	24.89	518.89	4002.4	13.681	1514.5	2521.7
3101.8	0.062861	511.02	4007.7	9.7509	1546.1	2522.5
3101.1	24.766	534.99	4011.6	12.896	1524.6	2522.8
3100.4	35.313	544.8	4021.9	-1.644	1534.9	2524
3099.6	10.495	540.46	4024.9	5.0357	1538.2	2529.6
3098.9	21.039	603.29	4035.8	22.319	1566.2	2547.8
3098.2	63.392	570.67	4036.2	7.7811	1569.4	2558.2
3097.5	24.444	619.33	4043.6	3.8502	1579.7	2568.5
3096.8	3.1765	650.32	4055.9	10.52	1572.3	2579.4
3096	24.31	706.02	4071.4	-4.0104	1586.2	2576.8
3095.3	41.903	666.33	4074.2	55.64	1624.7	2573.6
3094.6	24.174	640.78	4077.8	19.914	1603.2	2579.6
3093.9	70.007	721.17	4084.6	8.9181	1595.9	2577.3
3093.1	76.99	713.27	4098.3	19.106	1683.8	2586.5
3092.4	41.613	677.13	4102.6	11.641	1612.9	2587.3
3091.7	20.365	739.82	4101	14.765	1609.1	2600.4
3091	41.465	710.75	4103.8	46.114	1637	2614.6
3090.3	73.139	720.49	4117.7	63.339	1654.3	2619.1
3089.5	30.732	670.27	4115.4	59.395	1657.6	2635.1
3088.8	65.923	771.71	4123.7	30.765	1611.4	2635.2
3088.1	48.212	784.96	4135.3	47.982	1695.7	2641.9
3087.4	86.911	791.16	4136.5	51.089	1706	2654.1
3086.6	122.07	779.73	4143.5	43.621	1614	2656.9
3085.9	47.975	821.17	4155.6	67.871	1691.2	2657.5
3085.2	40.848	756.89	4152.9	56.877	1712	2637.8
3084.5	61.905	798.31	4151.1	31.796	1658.8	2636.1
3083.7	30.123	719.97	4143.6	3.2007	1662.1	2629.5
3083	19.481	778.99	4138.7	6.3076	1605.4	2625.9
3082.3	89.819	746.45	4134.6	27.016	1668.5	2619.2
3081.6	72.129	766.73	4126.2	54.756	1668.1	2606.4
3080.8	47.405	748.28	4119.1	29.693	1667.8	2612.9
3080.1	47.322	754.48	4125.2	25.751	1611.2	2613.1
3079.4	61.311	725.48	4121.6	49.955	1632	2608.9
3078.7	71.777	724.64	4121.1	38.974	1687.9	2604.6
3077.9	29.485	734.35	4118.3	66.682	1648.9	2593.7
3077.2	57.534	698.35	4114.5	17.02	1620.5	2596.6
3076.5	64.479	753.76	4111.1	58.783	1613.1	2581.3
3075.8	53.845	647.47	4110	82.954	1609.3	2572
3075	15.099	618.53	4096.8	54.4	1623.1	2565.4
3074.3	15.019	642.3	4092.9	22.342	1612.2	2563.2
3073.6	14.938	620.4	4088.1	60.556	1552.2	2574.2
3072.9	35.932	584.46	4083	28.506	1587	2568.6
3072.1	39.359	576.63	4086.3	21.05	1565.6	2565.2
3071.4	14.694	603.9	4082.1	52.219	1554.7	2564.6
3070.7	18.123	550.43	4064.7	34.227	1554.4	2556.3
3070	7.51	535.59	4055.1	26.77	1554.1	2551.3
3069.2	31.994	573.39	4045.9	-1.7402	1515.2	2535.8
3068.5	17.873	586.62	4035.4	15.372	1553.5	2529.5
3067.8	10.773	564.76	4032.1	-6.1121	1546.2	2532.6
3067.1	17.706	542.91	4027.5	10.992	1545.9	2523.8
3066.3	-3.4193	531.6	4027.3	-10.485	1517.5	2522.3
3065.6	56.105	572.87	4027	27.649	1527.8	2528.5
3064.9	-3.5808	554.54	4023.7	-25.375	1516.9	2526.7
3064.1	17.367	529.21	4023.2	5.736	1551.7	2526.4
3063.4	-3.7432	573.98	4018.7	-8.7201	1488.3	2513.4
3062.7	24.204	538.14	4010.7	32.886	1540.6	2506.1
3062	20.615	607.41	4010.9	-20.105	1533.3	2500.6
3061.2	13.524	568.08	4003.4	-3.0302	1504.9	2502.1
3060.5	-11.074	532.26	3999.2	10.535	1522.2	2504
3059.8	-0.65151	552.48	3996	27.596	1500.8	2507.6
3059	20.268	530.69	3999	6.1448	1511.1	2504.9
3058.3	16.681	554.4	4002.7	-39.798	1528.3	2516.9
3057.6	16.595	557.11	3999.9	-36.737	1517.5	2516.3
3056.9	16.508	563.32	4003	-12.687	1534.6	2513.2
3056.1	-4.5663	531.05	3996.6	4.3579	1453.9	2495.1
3055.4	26.826	586.22	3993.8	-10.08	1513.1	2491.3
3054.7	5.7573	553.96	3992.2	-7.0303	1523.3	2487.9
3053.9	2.1759	493.75	3990	-14.471	1533.4	2489.9
3053.2	16.073	527.93	3985.9	23.53	1540.1	2499.4
3052.5	29.964	534.14	3987.2	-1.3894	1511.9	2508.3
3051.8	-15.55	508.9	3983.6	5.1468	1480.1	2503.4
3051	29.784	490.67	3992.4	18.667	1500.8	2512.3
3050.3	-1.7421	486.41	3987.8	-23.706	1511	2513
3049.6	19.127	527.55	3983.5	17.75	1510.7	2510.8
3048.8	-1.9114	474.4	3979.9	6.8161	1527.9	2504.4
3048.1	8.4767	505.06	3976.8	16.831	1499.6	2499.3
3047.4	36.313	528.73	3982.6	33.821	1513.3	2485.5
3046.6	36.221	472.13	3978.1	-18.99	1544.4	2473.8
3045.9	-16.207	485.33	3982.5	-22.935	1512.7	2467.6
3045.2	-16.29	491.55	3987	-5.9499	1470.5	2467
3044.4	-19.86	539.62	4000.2	14.517	1491.2	2465.4
3043.7	11.442	507.47	4002.1	-59.18	1525.8	2469.1
3043	49.707	503.23	4005.6	3.1252	1466.2	2469.3
3042.3	18.239	516.42	4012.9	16.604	1532.1	2478.2
3041.5	-2.762	498.24	4010.7	23.106	1528.4	2487.2
3040.8	-6.332	473.1	4013.4	1.7269	1507.2	2482.1
3040.1	4.0355	486.29	4019.1	8.2274	1444.2	2487.6
3039.3	10.916	468.12	4014.4	-20.11	1520.5	2493.6
3038.6	0.37955	484.8	4006.4	-10.128	1474.9	2499.6
3037.9	21.187	435.3	4003.1	-7.1134	1481.6	2510.8
3037.1	21.097	525.09	3992.8	2.8611	1470.9	2516.8
3036.4	-6.8399	472.13	3999.2	-25.459	1498.5	2514.4
3035.7	-20.846	447.03	3995.2	19.315	1470.3	2508.2
3034.9	3.4297	491.54	3995.5	18.838	1508.3	2500.1
3034.2	24.217	487.32	3986.4	18.359	1445.4	2493.9
3033.5	-24.57	479.63	3979.2	3.9659	1528.6	2478.2
3032.7	-7.2628	489.33	3972.8	24.355	1497	2484.1
3032	30.901	457.31	3969.2	23.872	1486.3	2486
3031.3	-14.385	508.73	3969.3	58.153	1465.2	2485.1
3030.5	20.29	490.62	3967.8	-18.806	1496.2	2491.6
3029.8	13.251	510.74	3967.1	-12.333	1492.4	2494.7
3029.1	-7.685	496.12	3958.6	-12.814	1502.6	2475.4
3028.3	23.496	453.7	3958.9	14.497	1505.7	2467.9
3027.6	-0.90687	477.3	3952.3	-17.25	1529.8	2462.6
3026.9	16.371	493.95	3955.2	13.522	1522.5	2461
3026.1	-14.966	482.81	3952.8	30.394	1508.4	2454.6
3025.4	5.7799	499.45	3953	-32.585	1497.7	2453.6
3024.7	23.047	477.91	3946.4	-26.126	1483.5	2453.9
3023.9	-1.3333	466.79	3935.8	32.383	1521.4	2463.7
3023.2	-11.827	511.18	3939.3	4.1296	1500.3	2474.8
3022.5	-29.255	468.84	3945.7	-20.645	1507	2477.3
3021.7	-1.5882	495.88	3958.1	-14.197	1489.3	2477.9
3021	1.7946	477.83	3954.5	-18.156	1496	2489.5
3020.2	-8.6918	463.26	3953.7	5.622	1464.5	2495.1
3019.5	-8.7752	483.36	3950	8.5911	1516.2	2492.8
3018.8	1.5388	517.32	3941.9	-43.894	1495.2	2485.1
3018	-12.407	520.07	3935	-40.919	1533	2486.4
3017.3	-12.489	467.4	3938.4	-13.694	1508.5	2485
3016.6	-2.1799	487.49	3930.8	-3.8	1466.6	2480.8
3015.8	-26.507	511.04	3927.5	30.332	1507.9	2483.2
3015.1	-5.8107	468.79	3924.2	-1.3396	1525	2476.4
3014.4	-12.818	450.79	3920.9	43.163	1493.5	2490.6
3013.6	-16.361	477.79	3918.3	-19.654	1489.8	2498.1
3012.9	7.7828	445.96	3921.2	-23.617	1479.1	2506.5
3012.1	11.158	524.86	3929.7	45.083	1478.9	2506.8
3011.4	0.69312	527.63	3933.9	-0.40687	1499.4	2500.9
3010.7	7.5269	564.98	3933	2.5429	1492.2	2501.8
3009.9	0.52541	526.24	3938.6	-15.259	1540.3	2494.9
3009.2	24.645	490.98	3944.3	8.4358	1512.4	2489.3
3008.5	10.729	483.38	3962.3	-12.821	1515.6	2497.5
3007.7	10.644	538.01	3966.5	-20.244	1477.3	2496.5
3007	-10.176	485.49	3973.5	6.8899	1508.1	2509.9
3006.2	-13.712	515.91	3979.2	-41.998	1521.7	2518.6
3005.5	0.025444	580.86	3982.7	-4.5088	1504.1	2525.1
3004.8	-24.234	538.73	3982	12.243	1517.7	2518.3
3004	24.032	531.14	3971.1	4.8146	1462.2	2506.4
3003.3	-20.938	485.58	3973.1	-12.97	1541.3	2506.5
3002.6	-3.7571	533.24	3975.3	-6.5859	1506.5	2504.4
3001.8	-14.193	522.22	3966.6	-45.073	1513.2	2504
3001.1	9.8825	525	3966.5	-17.984	1519.8	2502.1
3000.3	2.8986	548.48	3963	-15.055	1529.9	2504.6
2999.6	16.614	534.01	3967.2	-5.2312	1543.4	2491.7
2998.9	-0.71494	536.79	3965.2	-23.002	1508.7	2504.8
2998.1	-28.382	546.47	3975.9	0.60937	1549.8	2494.5
2997.4	-14.668	511.33	3969.3	-6.8162	1487.4	2501.7
2996.6	19.723	576.16	3958	27.122	1480.3	2503.5
2995.9	9.2989	561.71	3947.2	36.924	1524.8	2501
2995.2	-14.904	526.58	3957.9	39.828	1517.7	2502.2
2994.4	-14.982	598.27	3956.2	25.505	1551.9	2492.5
2993.7	12.495	528.72	3964.1	-33.592	1530.9	2487.1
2992.9	22.744	641.71	3966.5	31.309	1520.4	2506.8
2992.2	-11.773	627.26	3975.4	-17.442	1533.9	2522.8
2991.5	-11.851	630.04	3975.9	-4.2085	1554.3	2543.6
2990.7	-5.0448	605.28	3967.6	22.785	1523	2544.9
2990	1.7586	614.94	3966	-19.058	1505.6	2548.6
2989.2	5.1191	579.87	3967.9	11.367	1501.9	2535.5
2988.5	-25.922	575.78	3969.8	3.9388	1539.5	2522.4
2987.8	-19.118	616.4	3968.3	-20.685	1559.8	2507.7
2987	18.633	660.45	3970.1	-24.669	1494.2	2482.9
2986.3	1.3593	652.91	3984.3	-1.1471	1545.6	2492.6
2985.5	8.1551	635.06	3993.6	-39.511	1559.1	2517.3
2984.8	8.0746	668.77	3996.5	-50.367	1538.2	2540
2984	25.176	678.42	3995.9	-2.8041	1568.8	2545.6
2983.3	14.786	650.27	3998.5	-6.7947	1548	2550.6
2982.6	-23.081	749.23	3988.6	-24.525	1568.3	2545.2
2981.8	7.7546	645.53	3992.5	19.569	1557.8	2531
2981.1	-2.6265	627.71	3998.2	-25.634	1557.5	2512.9
2980.3	0.7292	688.86	4010.4	-19.324	1601.9	2479.5
2979.6	21.247	681.34	4010.8	4.1452	1563.9	2469.3
2978.8	7.4372	742.46	4008.6	24.172	1597.9	2467.1
2978.1	10.79	704.06	4001.5	-14.142	1577.1	2455
2977.4	-6.4432	699.97	4002.3	-7.8443	1580.3	2474.1
2976.6	31.211	689.03	3991.1	-8.4106	1600.6	2498.4
2975.9	-3.1657	732.96	3979.7	-39.844	1579.8	2516.2
2975.1	17.331	732.31	3973	-47.265	1586.4	2535.9
2974.4	-3.3182	711.08	3978.9	13.879	1589.5	2527.4
2973.6	3.4609	628.17	3972.3	27.013	1599.6	2530.9
2972.9	-27.459	740.63	3976.2	46.994	1602.7	2524.6
2972.2	-20.677	719.42	3984.6	8.7195	1544.2	2521.3
2971.4	-31.027	691.37	3998.4	-19.266	1592	2509.8
2970.7	20.279	759.23	4005.8	21.259	1567.7	2496.4
2969.9	-0.34721	792.83	4007.9	3.5519	1612	2513.3
2969.2	20.12	727.12	4011.5	-3.8793	1550.1	2533.2
2968.4	-10.768	747.02	4021.8	-45.541	1614.9	2535.7
2967.7	6.2717	801.13	4030.9	25.756	1611.2	2551.5
2966.9	16.461	714.93	4038.6	18.32	1607.6	2558.7
2966.2	2.6977	758.77	4037.8	4.0428	1614.2	2565.4
2965.4	36.829	836.81	4048.5	17.135	1620.8	2559.9
2964.7	2.5471	808.79	4047	16.54	1613.7	2550.8
2964	2.4721	736.33	4044.2	5.6856	1603.2	2536.6
2963.2	-21.535	838.26	4037.5	-1.7481	1674.7	2514.2
2962.5	5.7407	844.45	4042.4	-43.363	1592.4	2487.7
2961.7	-25.093	758.35	4028.5	-16.612	1575.1	2492.3
2961	2.1735	826.06	4025.5	-30.876	1656.8	2497.1
2960.2	22.597	767.33	4023.2	23.19	1646.3	2514.8
2959.5	19.104	841.84	4018.8	-42.316	1622.2	2513.9
2958.7	19.027	776.31	4018.8	-25.837	1618.5	2515
2958	-15.195	809.82	4028.4	31.609	1628.5	2521.7
2957.2	-5.0238	809.18	4035.2	-9.971	1645.3	2524.6
2956.5	1.7305	805.13	4039.4	-17.405	1645.1	2512.9
2955.7	8.4824	780.61	4038	36.59	1610.7	2510.2
2955	-12.064	783.39	4040.3	53.03	1634.4	2507.7
2954.2	18.568	810.05	4034.2	1.2366	1651.2	2522.8
2953.5	-12.205	850.34	4044.8	24.496	1627.1	2534.7
2952.8	-2.0446	849.71	4051.8	6.824	1630.2	2529.9
2952	-22.574	842.25	4048.8	2.7943	1647	2519.9
2951.3	18.265	793.89	4050.3	19.218	1660.4	2527.6
2950.5	4.5567	840.98	4055.1	-5.2656	1629.5	2516.2
2949.8	18.114	857.38	4052.2	17.964	1632.7	2506.6
2949	18.039	870.37	4048.6	0.30093	1618.8	2499.9
2948.3	-2.4739	835.67	4041.1	-10.546	1673.1	2513.2
2947.5	41.73	913.37	4040.7	12.668	1666	2530.9
2946.8	-26.452	909.32	4033.2	25.656	1648.7	2535.1
2946	7.5271	939.32	4039.4	-15.836	1641.7	2540.4
2945.3	41.494	874	4044.6	-40.294	1624.4	2546
2944.5	14.189	931.23	4042.2	-3.4867	1665	2566.7
2943.8	-9.7033	978.22	4052.4	-7.5259	1671.6	2562.9
2943	31.052	963.96	4063.8	5.4449	1702	2549.4
2942.3	0.36326	939.5	4069.2	-2.0001	1660.9	2540.5
2941.5	-13.311	918.46	4070.3	17.762	1701.5	2549.6
2940.8	-13.379	931.42	4073.4	-3.2865	1704.6	2566.1
2940	-13.446	981.77	4083.3	19.865	1738.4	2571.9
2939.3	-27.11	1001.5	4076.9	63.4	1680.4	2577.9
2938.5	13.605	1034.8	4081.1	42.348	1669.9	2587.9
2937.8	-51.024	1010.4	4077.7	17.905	1686.7	2601
2937	-17.113	1053.9	4071.4	-37.105	1689.8	2606.5
2936.3	-34.162	1026.1	4065.2	-20.771	1703.2	2572.1
2935.5	-17.247	1056	4053.6	5.7426	1767.5	2561.8
2934.8	30.22	1048.6	4047.8	18.664	1658.6	2538.3
2934	13.172	983.41	4042.1	21.395	1719.4	2532.5
2933.3	-3.8693	1006.5	4038.5	-19.999	1695.4	2527.8
2932.5	2.849	1026.2	4033.2	3.0935	1688.4	2524.7
2931.8	-0.61338	1025.6	4037	-14.536	1725.5	2530
2931	-14.251	926.57	4029.2	-32.162	1687.9	2548.6
2930.3	-0.75109	1017.5	4038.3	-5.6941	1728.4	2550.3
2929.5	16.135	1027	4041.4	-19.928	1718	2544.5
2928.8	36.405	1036.6	4050.1	26.866	1727.9	2546.8
2928	-7.7362	1066.4	4056.2	5.8473	1690.4	2542.4
2927.2	-4.4143	1035.3	4054.8	45.838	1710.5	2521.6
2926.5	15.848	1021.1	4054.8	24.82	1747.5	2524.4
2925.7	-7.9374	1091.6	4061.7	7.195	1645.7	2535.8
2925	8.9317	1029.9	4072.4	-10.424	1750.4	2549
2924.2	8.8618	1002.2	4065.4	9.2122	1655.4	2561.1
2923.5	-1.3659	1015.1	4073	5.1373	1709.3	2562.1
2922.7	-11.59	1004.3	4065.7	31.531	1722.6	2541.3
2922	-4.8861	1044.3	4070.7	-3.0123	1695.3	2537.6
2921.2	-4.9532	1077.5	4059.4	26.752	1695.1	2541.7
2920.5	1.7467	1019.3	4050	29.436	1650.9	2534.8
2919.7	8.4442	974.72	4059.7	5.0545	1664.2	2527.6
2919	11.757	1041.7	4062	34.795	1660.6	2539.4
2918.2	8.3057	956.55	4061.5	17.181	1677.3	2562
2917.5	28.522	982.97	4058.8	-20.715	1704.1	2566.6
2916.7	-5.3541	989.1	4053.6	-7.8945	1734.3	2577.1
2915.9	-5.4206	974.95	4043.8	42.098	1707	2575.8
2915.2	4.6503	997.97	4060.4	7.5902	1713.5	2567.4
2914.4	14.718	980.45	4046.6	40.664	1699.8	2568.6
2913.7	4.5137	949.42	4037.8	-7.3464	1692.8	2562
2912.9	-19.195	1026.5	4024.7	-24.945	1621.7	2563.2
2912.2	-2.3759	941.42	4034.6	8.1099	1651.8	2534.7
2911.4	-2.4427	907.03	4042	-19.619	1698.9	2518.3
2910.7	10.992	940.17	4045.2	53.925	1641.3	2518.4
2909.9	24.422	912.55	4052.3	2.5703	1658	2500.4
2909.1	34.473	935.56	4051.2	15.342	1624	2512.3
2908.4	-2.7096	914.7	4055.8	14.613	1613.7	2527.5
2907.6	14.089	853.37	4043.4	-2.9826	1670.8	2529.3
2906.9	3.9018	856.13	4043.4	13.149	1657.1	2536.1
2906.1	-2.9094	858.9	4028.1	46.132	1626.5	2543.3
2905.4	13.88	895.38	4031.2	-15.292	1656.7	2550.8
2904.6	20.551	864.43	4037.3	-16.025	1619.4	2541
2903.9	-16.588	887.41	4035.4	13.568	1588.9	2542.4
2903.1	27.148	843	4031	-4.0215	1642.6	2542
2902.3	3.4957	771.66	4023.4	-1.3949	1625.5	2530.6
2901.6	6.796	828.32	4031.8	-25.716	1655.6	2539
2900.8	-0.006959	837.83	4030	10.583	1621.7	2543
2900.1	-13.541	837.22	4026	-37.304	1594.6	2558.7
2899.3	-3.507	846.72	4015.4	25.91	1618	2551.3
2898.6	6.5233	802.37	4024	15.055	1634.6	2550.6
2897.8	13.185	768.12	4033.1	-5.8929	1620.9	2555.4
2897	13.116	774.26	4050	-3.2851	1630.8	2564.8
2896.3	6.3188	797.21	4055.3	-10.772	1630.6	2553.9
2895.5	-13.928	786.53	4065.9	-28.348	1580	2533.4
2894.8	9.5449	772.49	4073.4	17.968	1610	2528
2894	-17.419	768.53	4079.9	27.284	1626.6	2525.4
2893.2	26.214	821.72	4075.1	23.15	1596.2	2521.9
2892.5	29.502	844.65	4065.5	32.457	1585.9	2520.7
2891.7	-4.1703	749.96	4059.6	11.518	1619.3	2502
2891	5.8415	796.41	4059.6	47.694	1646	2506.9
2890.2	12.491	745.43	4070.2	40.19	1635.7	2513.4
2889.5	-7.7276	738.12	4064.3	32.687	1612	2523.6
2888.7	5.6368	784.54	4067.5	5.0395	1601.7	2515.4
2887.9	25.71	790.66	4061.7	-12.53	1611.6	2520.5
2887.2	-14.638	739.72	4061.2	47.1	1598	2524.3
2886.4	5.4318	725.71	4074.9	22.813	1614.6	2526.6
2885.7	-1.3468	785.51	4064.2	8.5976	1624.4	2527.3
2884.9	-31.604	784.92	4050.2	-2.2598	1620.9	2530.5
2884.1	42.119	734.01	4057.6	43.899	1573.7	2531.9
2883.4	-21.668	760.25	4058.1	-3.8507	1617.1	2537.2
2882.6	21.853	706.01	4051.9	15.466	1633.7	2533
2881.9	1.6688	738.95	4053.2	-28.915	1640.2	2535.7
2881.1	1.6008	822.14	4051.4	10.504	1613.2	2534.8
2880.3	-11.87	771.27	4051.3	26.45	1613	2532
2879.6	24.916	794.12	4042.7	2.1846	1609.4	2513.1
2878.8	11.445	810.27	4040.5	-32.122	1609.3	2516
2878	14.724	796.27	4031.7	-6.1376	1575.6	2519.3
2877.3	24.698	829.15	4018.8	-37.087	1605.5	2521.9
2876.5	4.5391	748.19	4022.2	5.6226	1605.3	2523.5
2875.8	-12.266	801.15	4027.9	44.967	1635.3	2546
2875	-8.9851	837.35	4025.7	7.3253	1604.9	2546.8
2874.2	7.6775	756.43	4024.8	-13.577	1594.7	2549.7
2873.5	-5.7735	832.78	4031.4	49.16	1584.5	2542.2
2872.7	4.1929	802.06	4024	44.977	1634.5	2526.9
2871.9	-9.2527	771.35	4026	60.857	1634.3	2512.9
2871.2	14.084	787.46	4028.7	3.1734	1607.3	2500.5
2870.4	17.356	776.83	4019.9	19.051	1573.7	2502.8
2869.7	33.994	806.3	4028.8	-1.8442	1583.5	2498.4
2868.9	-6.1801	802.34	4039.7	60.805	1580	2513.1
2868.1	0.43384	775	4032.8	19.859	1573.1	2517.1
2867.4	-19.678	807.79	4044.2	62.434	1626.4	2520.1
2866.6	-9.7243	800.5	4048.1	18.158	1559.4	2517.3
2865.8	-16.47	746.45	4048.1	-2.7305	1609.3	2514.7
2865.1	3.4941	712.46	4045.3	43.157	1609.1	2520.8
2864.3	6.7616	711.86	4037.3	32.28	1588.9	2519.4
2863.6	-3.3215	764.65	4042.2	21.404	1638.8	2527.4
2862.8	-10.064	700.64	4045.9	20.541	1558.5	2540.5
2862	-33.485	653.33	4034.1	49.699	1541.6	2543.1
2861.3	43.166	679.42	4040.7	18.806	1544.8	2546.2
2860.5	-10.27	665.48	4031.5	14.601	1564.6	2531
2859.7	2.9985	721.56	4019.6	37.068	1587.8	2532.3
2859	19.595	650.95	4022.7	12.854	1560.9	2512
2858.2	29.52	617.02	4015.3	31.975	1554.1	2512.4
2857.4	-20.543	613.09	4004.2	-15.561	1547.2	2518.6
2856.7	6.0443	632.49	4006.6	-36.428	1547.1	2510.5
2855.9	15.965	575.26	4002.9	25.989	1566.9	2510.6
2855.1	9.2298	597.98	4002.3	-4.875	1526.7	2506
2854.4	2.4966	590.73	4013.3	4.2293	1519.9	2514
2853.6	5.7535	550.18	3999.5	-36.613	1533	2520.5
2852.8	-0.97691	519.64	4006.4	-14.197	1536.2	2522.9
2852.1	25.576	605.58	4006.8	4.8802	1539.3	2521.4
2851.3	28.826	531.78	3992.6	13.966	1522.5	2514.7
2850.5	5.4605	551.15	3999.5	43.007	1509	2511.3
2849.8	-1.2658	583.82	3999.2	15.487	1502.2	2523.3
2849	5.313	523.36	4011.7	54.488	1522	2528.2
2848.2	28.514	572.64	4032.4	26.971	1521.8	2520.5
2847.5	5.1647	542.12	4040	-10.511	1525	2521.8
2846.7	18.386	561.47	4032.4	11.846	1544.7	2538
2845.9	14.986	557.54	4029.1	27.546	1521.3	2544.4
2845.2	21.554	493.81	4021.5	83.109	1487.9	2575.2
2844.4	11.51	526.44	4017.4	-7.5189	1517.6	2586.8
2843.6	-5.1731	539.13	4017.5	24.774	1527.4	2583.4
2842.9	44.565	525.24	4016.2	-2.7203	1474.1	2566.9
2842.1	-1.9999	511.36	4009.2	-10.286	1500.5	2562.7
2841.3	27.802	514.08	4001.7	45.219	1513.6	2545.4
2840.6	24.403	500.2	3983.3	7.7703	1523.4	2524.9
2839.8	11.049	552.69	3971.4	-6.4387	1509.9	2508.9
2839	-15.57	495.68	3960.3	-14.01	1493.1	2502.2
2838.3	-9.0083	491.76	3942	-18.263	1499.6	2491.6
2837.5	17.45	507.73	3935	-25.834	1482.9	2516.7
2836.7	10.738	527.02	3930.6	19.648	1486	2525.4
2836	0.71427	533.04	3936.6	-21.085	1499.1	2531.2
2835.2	13.896	492.64	3949	-2.1425	1522.1	2528.5
2834.4	13.817	531.8	3953.8	0.2199	1459	2545.3
2833.6	17.051	554.38	3963.4	-47.123	1508.5	2543
2832.9	7.0319	500.74	3963.4	-48.071	1515	2547.1
2832.1	-6.2959	483.57	3970.6	-32.462	1491.6	2540.6
2831.3	10.186	489.57	3963.3	42.75	1521.2	2522.2
2830.6	-26.315	522.06	3972.4	-4.5774	1478	2520.5
2829.8	23.267	488.33	3972.4	-22.096	1461.3	2521.3
2829	13.255	484.4	3985.1	-23.061	1464.4	2522.3
2828.2	-33.155	566.51	3990.6	-53.814	1497.3	2524.8
2827.5	19.71	519.55	4000.7	11.393	1517	2517.7
2826.7	32.859	508.99	3996.2	40.185	1467.2	2516.6
2825.9	12.929	488.52	3989.1	22.66	1470.4	2504.9
2825.2	-3.6869	471.35	3983.2	-14.701	1476.8	2502.6
2824.4	-13.685	487.25	3983.4	20.683	1496.5	2504
2823.6	55.654	487.72	3982.5	22.996	1430.2	2491.6
2822.9	2.6841	488.18	3988	-4.4382	1492.8	2497.5
2822.1	-0.70153	488.65	3984	4.4822	1512.4	2500.1
2821.3	9.1285	504.53	4002.4	23.307	1489.1	2493.6
2820.5	9.0455	493.97	4010.5	45.426	1482.4	2485.5
2819.8	-14.155	493.33	4026.2	41.113	1515.2	2492.2
2819	-17.537	538.91	4033.4	-9.4275	1501.8	2497.7
2818.2	-27.519	518.45	4042.1	-3.8302	1511.5	2511.1
2817.4	12.011	494.69	4049.5	-18.042	1455.2	2529.2
2816.7	-1.2743	517.13	4057.2	-9.1501	1544.2	2549.3
2815.9	5.2417	437.29	4054.5	36.028	1481.3	2537.5
2815.1	5.1573	463.03	4057	38.303	1487.7	2544
2814.4	11.669	538.24	4051	0.99525	1474.3	2529.2
2813.6	-18.096	481.51	4058.9	-19.814	1487.4	2509.3
2812.8	-28.068	470.96	4046.8	51.699	1474	2503
2812	-1.7761	467	4040	37.475	1450.7	2516.7
2811.3	1.4351	466.34	4029.7	19.959	1473.6	2523.3
2810.5	-1.9456	472.27	4015.9	25.512	1526.2	2522.8
2809.7	-5.3255	432.07	4001	4.703	1509.5	2531.7
2808.9	17.647	487.4	3983.6	6.9566	1489.6	2537
2808.2	4.3844	437.33	3966.6	-40.194	1515.7	2531.8
2807.4	7.5898	551.91	3968.1	-24.767	1479.3	2531.6
2806.6	14.086	557.8	3964.6	76.247	1505.5	2526.3
2805.8	-35.377	553.82	3973.8	48.851	1508.6	2510.8
2805.1	-28.876	477.43	3969.6	64.244	1511.7	2501.2
2804.3	7.2348	463.59	3977.1	3.9511	1524.6	2499.5
2803.5	10.435	446.46	3986.6	-13.557	1494.8	2499.4
2802.7	10.344	478.67	3991.7	34.722	1481.5	2503
2802	-19.343	487.84	3988.3	33.652	1524.1	2502.5
2801.2	33.178	470.71	3986.9	-3.5876	1484.4	2503.9
2800.4	-6.3654	489.74	3983.4	51.228	1490.8	2510.7
2799.6	-13.028	492.33	3987.4	20.566	1500.5	2505
2798.9	-36.118	488.34	3993.9	29.347	1490.4	2515.1
2798.1	13.08	494.21	3997	24.979	1483.7	2506.8
2797.3	9.7019	506.64	4009.8	-2.3852	1467.1	2502.4
2796.5	16.177	453.38	4022.5	19.522	1506.3	2495.4
2795.8	16.083	475.66	4018.7	-11.119	1502.8	2477.9
2795	-6.9938	461.82	4019.6	20.624	1512.5	2479.5
2794.2	-7.0849	487.37	4027.6	12.965	1472.9	2475.3
2793.4	-30.149	480.09	4039.5	15.15	1466.1	2484
2792.6	-13.831	466.24	4039.8	-8.9184	1456.1	2490.2
2791.9	-4.0799	527.86	4046.6	3.1063	1498.5	2494.7
2791.1	-23.853	451.68	4054.8	77.444	1485.2	2513.2
2790.3	12.131	460.8	4056.3	79.605	1485	2508.2
2789.5	-7.6392	515.82	4055.3	55.531	1511.1	2499.3
2788.8	11.936	541.31	4061.2	-1.3199	1484.6	2499
2788	8.5611	517.62	4063.4	-8.9886	1487.7	2488.2
2787.2	18.295	507.05	4046.7	-19.933	1520.3	2502.4
2786.4	-1.4632	493.2	4046.1	-43.983	1490.6	2524.3
2785.6	-31.042	492.45	4047.1	43.35	1483.8	2545.3
2784.9	14.72	488.43	4038.5	52.042	1516.4	2555.1
2784.1	11.345	490.96	4054.7	-11.312	1457.3	2561.6
2783.3	-24.769	477.11	4059.3	10.478	1499.6	2554.5
2782.5	-15.042	460	4062	45.351	1519.1	2534.5
2781.8	4.4988	465.79	4070.5	37.661	1522.1	2531.4
2781	27.304	507.58	4065	-58.377	1479.4	2525.7
2780.2	1.0273	480.64	4045.9	32.096	1518.4	2504.9
2779.4	-2.3437	525.67	4056.7	30.945	1492	2502.4
2778.6	-8.9841	456.22	4065.2	-2.9109	1485.3	2512.4
2777.9	30.154	432.57	4070.1	31.906	1504.7	2508.2
2777.1	3.894	497.19	4059	60.17	1484.9	2506.2
2776.3	13.598	512.76	4061	-19.441	1478.1	2487.3
2775.5	0.42151	482.57	4072.4	15.352	1523.7	2470.7
2774.7	3.5864	491.59	4079.9	-5.4173	1461.4	2464.1
2774	19.817	516.94	4062.5	55.488	1503.7	2464.5
2773.2	-6.419	450.83	4065.4	28.182	1526.3	2481
2772.4	6.5407	548.01	4069.3	23.741	1516.3	2488.2
2771.6	16.23	481.91	4063.1	48.683	1512.8	2520.3
2770.8	19.387	464.8	4072.3	40.97	1535.4	2546.8
2770	25.806	499.9	4064.8	16.938	1502.6	2549.2
2769.3	-26.513	453.42	4064	-46.244	1518.7	2539.7
2768.5	9.2732	478.73	4064.6	30.88	1495.6	2521.8
2767.7	22.213	523.59	4047.5	16.64	1515	2504.6
2766.9	-10.511	506.47	4033.8	64.366	1465.8	2483.1
2766.1	21.991	460.01	4013.6	14.252	1475.4	2497.7
2765.4	12.099	485.28	4005	-6.5067	1530.6	2514.9
2764.6	-4.3082	539.87	4005.8	8.5923	1504.3	2528.2
2763.8	21.655	499.94	4014.3	-8.9046	1487.8	2554.1
2763	24.801	476.3	4009.3	87.642	1432.2	2578.7
2762.2	34.46	534.12	4005.8	-50.404	1516.7	2581.5
2761.4	8.2873	552.83	4007.3	-54.861	1542.5	2580.6
2760.7	11.432	506.39	4011.6	-7.2168	1483.6	2571.3
2759.9	14.575	473	4009.6	37.151	1503	2543.1
2759.1	-14.836	534.01	4020.6	-22.669	1548.3	2510.7
2758.3	46.894	442.03	4018.5	8.6593	1512.3	2519.4
2757.5	-31.324	506.28	4040.9	-34.869	1502.3	2525.1
2756.7	-21.67	502.18	4050.5	-16.569	1479.3	2510.8
2756	-8.768	605.42	4052.8	1.7203	1501.8	2498.4
2755.2	13.886	484.21	4055	-6.0162	1508.1	2519.3
2754.4	-28.502	525.63	4061.3	41.524	1514.3	2534.1
2753.6	3.8995	511.76	4063.2	-8.4896	1510.9	2553
2752.8	3.7841	488.14	4066.3	29.276	1491.1	2566.3
2752	-12.581	490.52	4074	11.776	1507.1	2556
2751.3	10.05	522.15	4079	10.527	1516.6	2547
2750.5	29.424	501.78	4076.3	54.755	1526.1	2549.5
2749.7	-6.4266	559.37	4092.2	-1.725	1451.2	2561.3
2748.9	19.437	480.54	4094.5	-6.2283	1457.5	2536.5
2748.1	-16.4	557.59	4074.4	70.438	1473.5	2524.6
2747.3	25.686	540.46	4053.8	59.423	1508.9	2545.9
2746.5	6.0891	484.39	4037.7	61.393	1495.7	2537.5
2745.8	31.929	515.95	4041.2	27.663	1459.8	2543.2
2745	-16.863	508.56	4027.9	49.098	1505	2527.4
2744.2	38.165	517.39	4007.1	-17.062	1527.4	2511.3
2743.4	-13.854	522.98	4007.2	1.1242	1520.7	2506.8
2742.6	-7.4872	486.4	3990.8	22.543	1507.5	2508.4
2741.8	-27.059	569.79	3979.6	-1.4374	1523.4	2530.2
2741	34.41	529.97	3971	29.691	1497.2	2541.2
2740.3	-4.6084	509.6	3953.5	-16.975	1506.7	2554.4
2739.5	8.2302	596.17	3949	-18.264	1532.4	2578.2
2738.7	1.6259	504.52	3970.3	6.3621	1503	2554.7
2737.9	24.175	535.99	3968.5	30.976	1512.4	2564.8
2737.1	24.046	496.19	3975.3	-2.7139	1496	2541.3
2736.3	7.7269	495.26	3993.3	-16.969	1511.9	2541.6
2735.5	-18.298	549.36	3996.9	-18.271	1505.2	2529.4
2734.7	-24.894	580.78	4014	-6.6306	1498.4	2520.6
2734	0.87244	534.52	4029.3	-17.65	1517.6	2523.8
2733.2	10.451	536.81	4032.4	23.099	1491.5	2521.9
2732.4	-12.322	535.85	4018.1	15.307	1494.4	2529.6
2731.6	-25.385	483.15	4018.3	39.856	1523.3	2519
2730.8	10.061	514.54	4032.2	28.824	1529.5	2509.5
2730	0.23115	542.67	4042.9	79.22	1545.4	2517.2
2729.2	16.263	548.17	4024.6	19.691	1486.9	2511.7
2728.4	-6.4924	489.02	4007.6	47.441	1515.7	2508.4
2727.6	-26.009	588.23	3998.9	26.709	1525.2	2511.9
2726.9	22.324	554.93	3999.9	25.366	1499	2508.9
2726.1	-3.6524	479.66	3994.1	4.6399	1508.5	2529.7
2725.3	-3.784	572.34	3980.2	3.2936	1492	2553.2
2724.5	-0.68739	532.6	3971.5	37.462	1514.4	2561.2
2723.7	-4.0487	534.84	3985.2	-5.8615	1517.3	2568.1
2722.9	-0.95433	472.52	4003	-33.037	1520.3	2583.2
2722.1	-1.0885	571.57	4002.6	-8.5709	1536.1	2560.9
2721.3	8.456	560.88	4012.8	-0.24932	1506.8	2549.1
2720.5	14.771	446.97	4033	95.163	1516.2	2523.1
2719.7	17.857	500.81	4035.3	32.5	1506.3	2514.8
2719	24.166	561.07	4057.2	37.574	1518.9	2469.1
2718.2	-14.663	550.38	4058.5	-2.4928	1525	2473.5
2717.4	17.436	546.14	4057.6	31.591	1511.9	2464.8
2716.6	-8.4878	477.43	4046.3	10.87	1556.7	2460
2715.8	26.82	579.53	4047.4	9.4884	1514.5	2498.5
2715	26.675	530.17	4050.6	1.6589	1507.8	2525.6
2714.2	3.9834	525.91	4039.3	100.12	1559	2529.3
2713.4	3.8425	515.22	4017.4	5.3238	1494.3	2545.6
2712.6	19.8	507.74	4010.9	13.589	1494	2533.5
2711.8	-12.537	509.93	4013.4	5.7514	1474.4	2528.7
2711	13.072	553.95	4020.9	-18.178	1496.7	2488
2710.2	-9.5989	501.4	4015.6	48.003	1489.9	2473.2
2709.5	-0.087924	519.66	4010.3	40.153	1508.9	2437.5
2708.7	12.636	486.44	4017.6	-28.816	1479.7	2446.1
2707.9	15.706	546.49	4026	-30.22	1505.1	2476.9
2707.1	-3.7358	513.27	4030.5	35.899	1520.9	2514.9
2706.3	31.485	463.98	4025.7	-42.685	1498.1	2539.5
2705.5	2.4037	495.07	4026	42.693	1497.8	2574.3
2704.7	2.2568	474.72	4028.6	-10.16	1503.9	2572
2703.9	24.602	563.62	4020.4	-34.075	1522.9	2573.3
2703.1	27.663	536.83	4035.8	25.542	1516.2	2562.9
2702.3	-23.883	526.11	4032.5	24.105	1525.5	2540.8
2701.5	20.933	499.33	4027.7	6.6087	1493.1	2531.1
2700.7	1.5153	543.2	4024.7	18.013	1505.6	2528.7
2699.9	7.7859	458.63	4026	19.778	1505.3	2542.4
2699.1	4.4247	518.53	4035	69.686	1537.1	2560.3
2698.3	13.9	498.17	4037.4	26.508	1498.3	2559.3
2697.5	-11.921	580.49	4019.4	9.0099	1539.6	2563.7
2696.8	-28.11	460.68	4031.9	17.179	1484.8	2569.4
2696	10.23	523.72	4027.3	25.341	1510.1	2584.3
2695.2	-5.9585	487.33	4033	11.051	1541.9	2584.6
2694.4	41.98	499.04	4034	38.441	1499.9	2557.5
2693.6	22.586	571.65	4021	-14.318	1528.4	2539.2
2692.8	28.836	548.08	4014.5	61.133	1505.6	2530.2
2692	19.063	508.49	4023.9	5.1769	1569.4	2530.1
2691.2	31.718	536.19	4016	-31.539	1498.6	2523.6
2690.4	-3.678	541.46	4007.8	5.4269	1495.1	2508.5
2689.6	5.7734	508.29	4025	13.553	1526.8	2520.7
2688.8	24.826	462.32	4030.8	31.278	1513.6	2563.1
2688	50.274	541.21	4028.9	-5.4295	1481.3	2579.2
2687.2	-10.707	517.65	4045.8	-10.117	1522.6	2600.6
2686.4	-20.465	494.09	4037	36.393	1509.4	2591.8
2685.6	14.574	528.13	4032.8	2.8941	1518.7	2589.9
2684.8	8.0128	578.15	4033.3	58.976	1534.3	2589.3
2684	-8.1412	500.21	4026.9	-38.486	1486	2583.8
2683.2	33.269	470.26	4014.1	59.145	1492.1	2580.6
2682.4	-2.0675	523.45	3996.8	32.048	1501.3	2565.3
2681.6	-11.819	535.05	3993.1	-11.022	1504.2	2550.5
2680.8	7.1956	479.54	4017	16.229	1513.4	2528.6
2680	3.835	532.68	4009.4	-49.199	1500.3	2511.6
2679.2	0.47524	461.2	4011.9	61.107	1490.4	2517.2
2678.4	-2.8838	504.74	4009.6	40.408	1553.9	2493.5
2677.6	19.306	509.93	4013.9	-15.418	1476.9	2496.5
2676.8	-15.986	448.06	4023.8	40.529	1524.5	2483.2
2676	28.543	545.83	4042.9	-31.244	1479.4	2502.6
2675.2	6.0285	515.89	4036.2	18.295	1511	2524
2674.4	9.0508	485.96	4043.8	67.813	1504.2	2539.5
2673.6	-7.0723	516.65	4067.6	31.161	1494.3	2535.6
2672.8	18.28	496.29	4070.5	10.471	1484.4	2524.3
2672	-10.597	555.67	4064.9	8.9204	1538.3	2534.4
2671.2	11.556	535.3	4060.9	26.5	1515.6	2566.8
2670.4	8.1952	559.57	4046	40.882	1496.1	2569
2669.6	11.21	494.58	4036.3	7.4415	1514.8	2591
2668.8	20.597	518.84	4021.5	40.938	1508.1	2585.6
2668	-24.189	552.64	3996.6	20.247	1498.2	2582.4
2667.2	-2.0565	503.6	3971.5	2.7488	1539.2	2569.6
2666.4	-8.6002	502.35	3963.6	42.587	1554.8	2557.4
2665.6	-11.957	485.18	3988.2	-48.164	1484.3	2537.1
2664.8	19.711	512.58	3983.7	10.766	1547.7	2511.8
2664	-5.9358	539.97	3967.8	-13.099	1474.1	2517.1
2663.2	-6.1107	487.77	3967.1	-30.594	1578.7	2546
2662.4	25.537	489.69	3978.9	41.02	1508.3	2524.4
2661.6	28.537	440.7	3989.5	-24.21	1511.1	2538.6
2660.8	-0.276	550.77	3994.2	-51.245	1469.4	2546.7
2660	21.809	463.61	4000	1.2383	1510.4	2562.4
2659.2	18.447	519.57	4009.2	28.26	1516.3	2569.6
2658.4	5.5467	556.43	4021.8	-8.3176	1509.6	2594.2
2657.6	5.3657	545.6	4040.7	28.224	1569.6	2603.6
2656.8	8.3624	598.32	4051.9	131.49	1534.2	2589.3
2656	17.712	574.76	4058.5	5.9326	1543.4	2595
2655.2	11.174	576.62	4063.9	10.672	1523.9	2572
2654.4	-11.245	578.48	4067.8	15.407	1488.6	2544.3
2653.6	48.913	507.29	4071.7	10.61	1500.9	2532.2
2652.8	-27.483	550.42	4063.1	12.159	1513.2	2523.6
2652	7.2585	584.02	4045.7	-18.039	1528.7	2557.9
2651.2	22.942	592.2	4041.2	-10.142	1525.1	2570
2650.4	13.233	597.21	4044.9	-5.4256	1553.3	2595.5
2649.6	3.5262	554.61	4052.4	5.6317	1502.1	2602.8
2648.8	12.856	562.78	4031.5	-11.868	1568.3	2607.5
2648	28.525	539.23	4030.5	-16.678	1520.3	2617
2647.2	34.674	572.77	4038.5	57.784	1519.9	2611.2
2646.4	37.65	555.56	4046.9	33.935	1563.9	2615.2
2645.6	18.435	589.07	4042.1	10.089	1547.6	2604.1
2644.8	-10.281	587.7	4050	36.956	1550.4	2612
2644	33.893	554.64	4057.4	25.787	1575.3	2623.3
2643.2	17.856	559.6	4078.7	77.979	1527.4	2635.3
2642.3	11.326	618.41	4083.8	22.454	1584	2642.6
2641.5	-1.5346	617.02	4101.4	74.622	1583.5	2664.5
2640.7	33.103	647.28	4107.4	50.774	1551.4	2683.8
2639.9	39.235	699.7	4119.1	-39.547	1579.5	2691.3
2639.1	39.034	695.11	4116.9	56.902	1604.4	2678.4
2638.3	64.149	643.06	4125.4	61.543	1581.8	2675.5
2637.5	60.779	635.32	4128.2	34.539	1565.5	2685.7
2636.7	44.756	668.7	4111.9	32.846	1543	2662.8
2635.9	60.366	676.76	4108.5	27.991	1640.6	2635
2635.1	34.861	627.89	4110.1	45.266	1605.3	2628.1
2634.3	40.981	616.98	4108.1	2.4634	1544.8	2613.8
2633.5	34.454	631.35	4099.1	82.95	1572.8	2613.4
2632.7	12.127	633.08	4084.3	55.952	1619.8	2615.7
2631.9	37.205	603.2	4074.3	25.799	1575.1	2611.1
2631.1	14.885	617.56	4075.1	-16.982	1562	2588.2
2630.3	36.792	581.36	4065.6	47.641	1539.4	2602.7
2629.4	17.637	595.71	4054.7	33.287	1557.9	2599.2
2628.6	14.276	581.63	4057.8	-41.056	1570.1	2580.5
2627.8	-23.81	542.3	4058.4	51.937	1516	2565
2627	17.023	635.54	4066.7	40.736	1540.8	2538.9
2626.2	7.3507	586.73	4063.1	23.224	1524.6	2514.8
2625.4	48.162	525.33	4061.4	-51.076	1521	2508.5
2624.6	10.096	577.5	4055.1	-18.098	1511.1	2519.3
2623.8	0.42804	512.95	4064.9	55.862	1535.8	2531.7
2623	28.603	546.17	4053.4	-40.485	1503.9	2541.2
2622.2	22.086	516.33	4074.2	74.429	1541.2	2568.1
2621.4	9.268	543.22	4068.3	22.237	1506.1	2574.8
2620.6	2.7566	560.65	4053.2	-1.5763	1521.4	2604.1
2619.7	-10.055	508.75	4050.2	9.2778	1514.6	2622.1
2618.9	-35.463	617.53	4048.3	4.3711	1479.5	2605.1
2618.1	-4.1672	499.49	4042.7	2.6128	1520	2581.4
2617.3	11.371	542.09	4032.1	-40.087	1525.8	2584.9
2616.5	-1.4354	502.81	4020.2	46.315	1512.8	2568.9
2615.7	-14.237	491.87	4001.3	25.652	1524.9	2564.4
2614.9	-17.592	572.2	4001.4	-39.071	1505.5	2568.3
2614.1	19.961	548.66	3991.1	15.804	1483	2567.3
2613.3	38.623	547.14	3992	1.4399	1514	2560.4
2612.5	-2.4892	577.08	3993.6	-28.65	1491.6	2589
2611.6	31.894	506.36	3996.8	10.458	1497.4	2614.9
2610.8	9.6634	539.43	3989.1	24.392	1503.2	2588.5
2610	12.591	493.88	3985.6	10.022	1505.9	2589.2
2609.2	18.661	435.78	3992.6	-7.4891	1483.4	2573.8
2608.4	15.3	534.83	4005.6	44.141	1486	2563.5
2607.6	-13.197	467.3	4008.5	17.198	1517	2572
2606.8	36.853	497.18	4001	40.524	1488.2	2567.4
2606	-19.907	564.74	4018.1	41.853	1550.6	2547.4
2605.2	8.1419	556.9	4004.3	109.12	1506.1	2558.5
2604.3	-23.475	539.64	4010.5	6.8205	1537	2566.1
2603.5	-1.7148	519.24	4018	8.1429	1539.6	2566.6
2602.7	26.313	511.41	4019.3	9.4616	1498.3	2532.3
2601.9	7.2611	506.7	4030.5	1.3628	1507.3	2546.5
2601.1	10.177	520.82	4032.6	-0.46362	1513	2538.9
2600.3	35.048	459.65	4035.4	-24.248	1547	2535
2599.5	31.684	467.49	4030.5	5.2866	1543.4	2549
2598.6	-6.1706	541.17	4056.3	-15.361	1502.1	2533.8
2597.8	12.418	473.75	4051.8	23.56	1498.5	2549.5
2597	9.0585	522.32	4052.2	6.0424	1485.5	2560.8
2596.2	24.502	508.19	4051.3	-42.812	1525.7	2555.1
2595.4	14.874	509.73	4035	-0.78483	1500.1	2536.1
2594.6	42.841	498.73	4025.3	3.6314	1505.9	2513.4
2593.8	45.739	490.86	4033.7	4.9085	1505.4	2526.7
2593	-7.7304	529.97	4028.4	71.943	1479.8	2524.3
2592.1	-20.479	537.74	4025.9	16.844	1485.6	2527.7
2591.3	13.732	520.47	4023.9	36.89	1447.5	2558.3
2590.5	0.98253	528.24	4012	35.015	1472	2552.5
2589.7	38.304	532.87	4007.6	73.819	1515.3	2580.5
2588.9	3.6543	543.75	3994.1	50.031	1508.5	2569.7
2588.1	22.192	479.56	3998.6	88.811	1470.5	2562.7
2587.2	6.3217	509.2	3988.9	14.984	1488.7	2522.9
2586.4	12.344	488.8	3979.5	0.59193	1525.7	2513.2
2585.6	12.111	518.42	3986.9	8.0828	1468.9	2526.3
2584.8	8.7516	566.78	3983.5	-46.943	1534	2547.2
2584	-25.857	524.49	3995.6	13.673	1477.2	2554.9
2583.2	14.533	544.71	4000.7	-28.841	1511.1	2559
2582.4	23.669	493.06	4006.4	25.494	1463.7	2567.4
2581.5	54.664	560.11	3996.9	89.176	1516.3	2606.3
2580.7	-20.525	511.6	4007.4	2.9395	1497	2620.1
2579.9	7.3431	497.44	4013.3	-2.0912	1480.8	2618.3
2579.1	-14.744	567.56	4008.9	30.333	1508.4	2590
2578.3	25.595	522.18	4021.3	-30.885	1520.3	2599.1
2577.5	25.354	529.85	4037.1	14.007	1479.2	2589.7
2576.6	-21.684	534.4	4047.2	37.041	1506.8	2604.8
2575.8	-6.321	557.66	4063.2	25.751	1493.7	2594.1
2575	15.272	477.99	4069.6	30.056	1496.3	2571.6
2574.2	15.031	495.01	4049.6	9.4094	1539.4	2583.7
2573.4	-3.9152	496.42	4038.8	-17.467	1507.7	2600.2
2572.5	-25.971	494.72	4033.6	30.468	1507.1	2610
2571.7	-13.742	505.48	4047.8	-21.339	1506.6	2594.6
2570.9	-13.98	444.57	4046.6	73.306	1474.9	2561.3
2570.1	1.3571	467.78	4054.1	-37.685	1480.5	2550.6
2569.3	-5.1136	490.99	4073	-36.514	1501.8	2542.3
2568.5	-17.81	567.11	4073.3	36.271	1535.5	2602.1
2567.6	6.8569	552.92	4074.7	-18.619	1500.7	2599.5
2566.8	6.6124	488.92	4069.2	16.776	1515.7	2586
2566	0.14313	540.09	4052	-34.986	1487.1	2609
2565.2	34.126	532.12	4043.6	-15.166	1492.7	2617.8
2564.4	-12.79	446.38	4045.1	20.196	1489.1	2643.5
2563.5	52.285	453.97	4022.7	46.212	1479.2	2637.2
2562.7	-0.837	523.75	4036.3	-55.289	1515.9	2603.5
2561.9	39.337	562.41	4057.3	54.672	1565.1	2576.8
2561.1	11.105	591.73	4054.6	93.089	1508.5	2576.7
2560.3	-29.55	515.35	4041.2	0.95073	1501.7	2593.1
2559.4	-1.8247	510.48	4034.8	30.035	1507.4	2580
2558.6	22.782	558.41	4023.4	-9.249	1553.4	2589
2557.8	41.167	478.97	4014.6	-70.263	1546.6	2595.1
2557	-2.5706	517.57	4005.5	67.505	1533.6	2598.7
2556.1	71.703	546.84	4009.4	-24.56	1489.5	2612.3
2555.3	-24.802	510.89	4015.1	29.318	1510.7	2604.4
2554.5	-3.3206	487.37	4032.6	24.198	1485.2	2591.7
2553.7	5.7384	494.89	4047.7	37.695	1512.6	2597.8
2552.9	27.205	552.05	4053	10.849	1508.9	2586.1
2552	-25.791	506.8	4043	30.541	1502.1	2602.8
2551.2	-4.3275	517.4	4028.3	28.511	1566.6	2618.6
2550.4	10.925	503.18	4018.6	-26.24	1510.2	2599.3
2549.6	10.669	516.87	3991	61.648	1534.4	2593.6
2548.8	16.612	546.05	3980.4	34.803	1496.6	2602.9
2547.9	31.85	497.73	3979.7	14.162	1471.2	2608
2547.1	-5.5965	564.08	3980.5	-21.968	1479.9	2600.7
2546.3	-18.244	509.57	4014.8	47.25	1519.6	2596.5
2545.5	24.868	498.44	4026.8	1.8282	1500.4	2587.7
2544.6	15.315	564.74	4012.3	33.841	1524.5	2550.6
2543.8	-12.813	541.21	4006.9	-14.664	1486.8	2565.7
2543	24.081	530.07	4025.1	14.239	1535.7	2559.3
2542.2	17.627	512.74	4039.1	40.031	1482.4	2530.5
2541.3	26.648	495.41	4053.5	-42.501	1534.4	2547.7
2540.5	26.384	524.5	4047.3	-16.715	1509.1	2589.7
2539.7	-11.003	544.29	4046.7	64.74	1474.4	2611.5
2538.9	7.2955	536.23	4062.6	3.8892	1483.1	2620.4
2538	7.0327	494.16	4091.5	20.363	1473.2	2624
2537.2	46.962	510.84	4085.1	39.921	1491.1	2575.8
2536.4	6.506	515.14	4083.7	-36.359	1493.6	2546.5
2535.6	-24.663	553.44	4093.4	4.8266	1511.5	2563
2534.7	-6.3823	573.17	4066.2	24.364	1492.3	2557.1
2533.9	-22.092	562	4055.8	37.712	1562.8	2526.6
2533.1	39.424	523.04	4037.7	4.719	1518.9	2533.1
2532.3	-13.348	443.93	4034.9	45.85	1518.2	2546.1
2531.4	-19.786	460.57	4023.1	-27.28	1508.3	2560.7
2530.6	44.78	498.81	4013.5	7.6608	1486.1	2579.3
2529.8	13.641	462.95	4025.4	-0.62566	1491.6	2593
2529	19.543	528.94	4007.3	43.548	1494.1	2553.5
2528.1	0.76053	545.53	3983.6	22.91	1552	2552.9
2527.3	12.831	506.59	3972.5	-34.743	1471.2	2572
2526.5	-2.8598	452.23	3973.9	24.822	1467.5	2599.8
2525.7	-18.546	524.32	3988.5	-23.566	1513.1	2610.4
2524.8	-21.894	485.39	3972	-7.1961	1484.7	2613
2524	42.57	498.88	3952.2	18.411	1517.9	2627.7
2523.2	11.474	472.29	3960.3	-51.531	1498.8	2634.9
2522.3	20.445	538.14	3976.2	-16.691	1528.9	2616.9
2521.5	14.009	428.37	3981.7	-15.752	1519	2633.9
2520.7	1.4141	497.27	3987.5	28.302	1512.2	2644.8
2519.9	-20.415	504.56	4005.2	16.905	1539.3	2622.7
2519	22.421	539.55	4024.9	20.903	1520.1	2601.2
2518.2	37.535	571.45	4022.9	31.051	1488.7	2604
2517.4	18.788	492.53	4043.8	-11.128	1481.9	2612.6
2516.5	6.2021	490.56	4051.7	42.095	1530.4	2613.6
2515.7	-37.146	494.75	4052.5	33.765	1480.5	2602.3
2514.9	-15.881	397.42	4049.1	71.572	1513.7	2582.5
2514.1	14.6	524.62	4057.1	-29.032	1522.3	2581.3
2513.2	8.1721	451.92	4075.1	27.215	1555.4	2604
2512.4	-4.4031	563.69	4063.3	83.435	1536.3	2603.3
2511.6	-16.974	438.74	4052.9	59.717	1452.6	2576
2510.7	-14.175	528.95	4048.6	-0.87483	1495	2561.4
2509.9	3.9852	576.11	4052.4	30.728	1515.8	2583.5
2509.1	12.922	475.79	4056.7	10.092	1527.4	2569.5
2508.3	12.641	449.22	4029.3	1.7466	1517.5	2559.6
2507.4	43.067	517.85	4020.4	8.7542	1476.9	2555.3
2506.6	-18.625	457.5	4021.2	-57.932	1506.9	2581
2505.8	-12.762	507.68	4019.6	38.094	1546.1	2622.1
2504.9	-0.76399	478.04	4019.8	-7.0931	1474.9	2606.7
2504.1	-7.1818	522.04	4013.5	67.401	1471.1	2600.1
2503.3	23.217	486.27	4015	-20.735	1528.7	2608.5
2502.4	7.5938	524.11	4009.5	13.849	1531.1	2590
2501.6	-11.09	509.81	4009.8	33.085	1481.3	2605.9
2500.8	16.224	535.36	4019.7	36.976	1480.6	2556.1
2499.9	15.938	481.2	4023.6	4.0766	1516.7	2527
2499.1	21.781	531.26	4014.3	57.005	1500.7	2537.6
2498.3	-6.0873	538.4	4020.3	21.043	1500	2548.7
2497.4	-6.3708	462.81	4020.1	15.728	1508.5	2590.7
2496.6	23.978	534.28	4011.6	41.045	1489.4	2600.3
2495.8	11.437	470.96	3996.7	-25.534	1513.2	2645
2494.9	-7.224	569.95	3980.2	30.392	1463.5	2677.2
2494.1	35.352	405.61	3992.9	3.6322	1472	2668.8
2493.3	13.632	467.83	3989.2	16.671	1495.7	2685.3
2492.4	-8.0806	517.79	3980.2	38.883	1449.1	2655.3
2491.6	16.111	497.35	3969.2	-42.949	1518.8	2627.4
2490.8	46.412	513.62	3961.6	37.38	1481.4	2652.7
2489.9	18.587	523.77	3968.6	-35.255	1505.1	2646.2
2489.1	18.294	494.15	3972.6	-3.8925	1492.2	2646.9
2488.3	30.231	556.26	3981.7	39.684	1503.7	2647.6
2487.4	-37.317	541.93	3987.3	-5.4092	1484.6	2646.9
2486.6	26.582	466.47	4020.2	-22.982	1563.4	2627.8
2485.8	-4.2711	491.87	4022	66.396	1489.3	2626.4
2484.9	13.769	483.65	4032.6	64.084	1522.2	2617
2484.1	40.966	524.31	4057.9	-23.76	1512.3	2599.2
2483.3	7.0719	500.81	4069.3	108.31	1523.8	2589
2482.4	-5.4358	535.33	4048.6	112.09	1513.9	2616.5
2481.6	9.536	502.67	4064.6	57.852	1488.7	2595.3
2480.8	-15.177	491.39	4054	-20.783	1521.6	2581.8
2479.9	-3.262	516.73	4049.7	19.622	1523.9	2556.3
2479.1	-3.556	532.9	4062	35.599	1465.2	2534.2
2478.3	2.2508	555.16	4062.4	45.465	1537.6	2521.9
2477.4	20.255	495.05	4068.1	-45.325	1530.8	2568.6
2476.6	10.807	465.47	4042.9	28.582	1463	2610.8
2475.8	4.4109	512.1	4039.1	84.163	1520.2	2618.1
2474.9	-8.0793	488.61	4036.9	-24.883	1473.7	2642.6
2474.1	16.006	547.41	4023	67.251	1515.6	2671.2
2473.2	-2.5768	533.05	4025.9	-44.808	1499.6	2661.8
2472.4	24.544	494.33	4023.3	44.241	1544.6	2638.4
2471.6	27.287	534.8	4048.4	-25.135	1482.9	2616.8
2470.7	14.802	526.53	4049.4	33.414	1515.6	2611.7
2469.9	2.3206	506.09	4048.3	27.998	1457	2612.6
2469.1	-25.377	467.38	4037	-29.172	1511.1	2621
2468.2	56.505	495.64	4023.6	84.118	1486	2636.1
2467.4	-10.753	429.55	4033.5	-12.608	1518.7	2631.8
2466.5	37.627	436.5	4026.6	82.373	1527.1	2640.4
2465.7	22.109	525.58	4013.8	0.8834	1511.1	2650.6
2464.9	12.679	477.76	4037.6	59.323	1543.8	2631.8
2464	-21.073	533.34	4044.8	38.676	1500.4	2617
2463.2	2.9492	509.84	4060.4	-30.61	1469.3	2627.7
2462.3	-0.39399	501.56	4091.3	49.066	1498.9	2633.8
2461.5	-3.7363	523.66	4092.3	125.67	1516.4	2625.6
2460.7	11.152	402.94	4106.5	-19.567	1518.6	2626.8
2459.8	13.884	531.37	4104.4	38.785	1454	2642.6
2459	-31.983	547.36	4122.9	-0.083309	1520.1	2642.4
2458.1	-17.098	548.16	4120.9	40.013	1540.6	2646.4
2457.3	12.96	466.99	4105.9	-59.57	1548.9	2675.3
2456.5	21.759	473.87	4109.5	-13.414	1511.7	2648.8
2455.6	-21.042	511.09	4124.7	-27.981	1483.6	2642.4
2454.8	18.103	487.61	4142.6	-24.337	1504.1	2637.5
2453.9	23.86	488.4	4133.2	33.907	1521.5	2640
2453.1	-28.018	528.62	4135.3	49.661	1466.1	2611.7
2452.3	2.0062	544.56	4143.8	-22.543	1501.7	2621.4
2451.4	4.7295	542.3	4138	62.946	1537.3	2598.6
2450.6	7.4513	464.25	4132.5	-60.776	1527.4	2600.5
2449.7	13.202	431.68	4110.5	-14.724	1520.5	2614.9
2448.9	-8.3222	538.52	4111.7	70.703	1507.6	2638.3
2448.1	18.637	487.77	4096.9	-28.726	1512.9	2640.4
2447.2	9.2355	440.06	4103.6	-31.185	1524.2	2648.8
2446.4	30.123	495.34	4108.5	17.836	1529.5	2673.8
2445.5	-18.643	444.61	4103.4	33.529	1498.4	2692.9
2444.7	-3.8136	518.03	4103	-17.392	1470.3	2659.8
2443.8	17.063	527.85	4088.1	-7.7621	1490.7	2645.7
2443	1.6157	522.52	4076.6	13.966	1538.4	2615.6
2442.2	16.431	511.15	4067.5	65.939	1486.1	2625.9
2441.3	0.98878	442.3	4046.2	63.435	1494.4	2586.2
2440.5	-2.3497	536.79	4049	-2.5882	1490.5	2589
2439.6	-35.928	516.34	4064.7	100.75	1492.8	2597.8
2438.8	24.234	471.7	4100.5	25.67	1479.9	2620.4
2437.9	2.7538	487.53	4110.9	89.661	1463.9	2656.9
2437.1	8.4824	479.17	4108.8	2.5089	1469.2	2680.5
2436.3	8.1651	443.62	4101.3	-33.245	1534.8	2649.6
2435.4	7.8471	510.79	4100.6	-20.652	1473.6	2640
2434.6	-4.5532	499.4	4086	-38.272	1497	2617.6
2433.7	-10.91	524.25	4068.9	-40.792	1517.3	2596.4
2432.9	-8.2055	509.84	4061.2	8.0168	1489.3	2551.5
2432	6.573	516.56	4084.5	29.635	1494.5	2552.4
2431.2	-26.948	481.01	4081.3	5.9622	1496.7	2557.6
2430.3	-30.279	557.13	4109.1	-8.65	1520	2568.2
2429.5	20.699	539.69	4098	55.185	1516.2	2606.5
2428.7	-3.7568	513.2	4084	10.393	1542.5	2613.2
2427.8	-40.268	471.63	4084.3	68.158	1463.2	2587.8
2427	-13.442	384.85	4062.7	8.2957	1513.7	2595.7
2426.1	-25.819	469.94	4067.6	17.794	1527.9	2600.2
2425.3	31.136	446.48	4066.2	-23.959	1448.7	2613.8
2424.4	24.781	480.28	4051.8	60.874	1502.1	2632
2423.6	18.429	486.95	4062.1	10.082	1501.3	2671
2422.7	-2.9848	484.58	4054	25.58	1476.3	2680.6
2421.9	-9.3308	497.26	4056.5	35.043	1514.7	2713.6
2421	5.4052	500.9	4018.2	32.453	1507.8	2729
2420.2	-0.94078	471.42	3994	32.872	1543.1	2716.6
2419.3	-19.326	426.89	3978	66.396	1464	2710.4
2418.5	7.4409	472.67	3989.6	12.625	1487.2	2676.1
2417.7	-28.995	491.34	3997.5	-26.086	1507.4	2643.9
2416.8	-5.2456	446.82	4016.2	-10.633	1506.6	2640.6
2416	-11.586	468.49	4039.4	16.843	1493.7	2621.5
2415.1	3.1278	445.04	4065.9	-15.845	1486.8	2643.7
2414.3	-12.233	418.58	4069.6	8.604	1486	2673.1
2413.4	-0.53213	443.24	4093.7	42.061	1467.1	2710.5
2412.6	5.1524	518.98	4092	30.413	1526.4	2709.1
2411.7	1.8191	486.5	4112.3	93.893	1543.5	2688.8
2410.9	-19.541	574.21	4120	7.1183	1512.6	2663.8
2410	-16.861	424.57	4135.1	25.511	1508.8	2627.7
2409.2	15.851	428.16	4143.4	-19.181	1522.9	2610.2
2408.3	6.511	485.8	4154.7	29.231	1525.1	2614
2407.5	-2.8264	477.35	4133.8	44.593	1509.2	2580.7
2406.6	-6.1571	501.93	4141.4	-9.0949	1514.3	2616.6
2405.8	-33.496	475.47	4145.2	69.284	1501.4	2656.6
2404.9	-3.8144	470.03	4148.1	-35.405	1494.6	2681.2
2404.1	28.855	461.58	4147.7	-20.062	1502.7	2690.5
2403.2	7.5229	486.12	4146.5	130.25	1534.8	2672.3
2402.4	1.1922	426.69	4149	-19.39	1489	2670.1
2401.5	-2.1382	595.14	4162.9	37.905	1476.1	2666
2400.7	9.5207	478.74	4165.3	-18.738	1505.2	2657.7
2399.8	39.158	488.26	4161	74.493	1495.3	2621.9
2399	-9.1281	443.83	4146.5	11.86	1506.5	2598.6
2398.1	11.512	513.27	4144	78.078	1499.6	2651.6
2397.3	-9.7917	456.86	4135.7	24.447	1537.7	2698.4
2396.4	-19.109	490.32	4130.3	15.755	1512.8	2707.6
2395.6	-1.4739	451.91	4101.9	51.976	1470	2733.8
2394.7	-13.783	449.42	4105	43.274	1552.9	2731.8
2393.9	-26.089	437.96	4087.5	-25.291	1522.1	2720.4
2393	-20.434	486.34	4082.6	40.828	1539.2	2684.6
2392.2	-2.8147	462.89	4080.9	-57.642	1463.5	2661.4
2391.3	29.755	502.27	4076.2	50.33	1486.5	2599.1
2390.5	5.4855	484.81	4070.6	-0.25865	1473.7	2598.4
2389.6	32.06	458.37	4108.8	56.818	1547.6	2630.2
2388.7	4.8087	518.65	4109.9	36.137	1495.8	2633
2387.9	7.4587	474.27	4107.7	21.434	1524.8	2622.7
2387	7.1187	516.58	4115.6	21.676	1491.1	2625.7
2386.2	33.671	526	4119	42.833	1490.2	2616.6
2385.3	27.35	448.78	4129	-88.387	1575.9	2604.8
2384.5	-14.811	485.08	4146.6	-16.452	1494.3	2583.7
2383.6	-21.12	536.3	4148.3	46.493	1520.3	2587.3
2382.8	-21.457	503.89	4147.7	46.707	1483.6	2571.5
2381.9	-3.8825	489.4	4162.5	70.8	1527.5	2596
2381.1	10.7	504.76	4152.7	47.124	1511.6	2611.6
2380.2	58.101	576.81	4131.8	-21.307	1507.7	2619.6
2379.4	1.0619	559.32	4136.2	62.437	1500.9	2676.3
2378.5	0.71947	529.9	4130.9	-2.9966	1500	2681.1
2377.6	45.111	515.4	4152	32.986	1537.8	2710.2
2376.8	5.997	566.5	4169.1	48.082	1510.1	2731.7
2375.9	-24.159	498.33	4177	15.466	1497.2	2748.6
2375.1	-6.615	462.97	4168.9	6.7037	1535.1	2728.2
2374.2	-21.858	549.8	4179.9	51.578	1543.1	2691.6
2373.4	34.411	588.92	4208.4	-28.704	1530.2	2645
2372.5	-7.6448	508.87	4231.9	-7.6764	1526.3	2635.8
2371.7	-19.902	574.78	4197.9	66.946	1501.6	2622.2
2370.8	-5.3555	491.77	4198.9	99.846	1515.5	2661
2369.9	3.2309	498.11	4209.2	49.369	1502.7	2618.8
2369.1	26.697	513.37	4197.4	-24.906	1492.9	2645.8
2368.2	20.392	442.31	4177.5	49.643	1465.2	2682.6
2367.4	28.968	475.42	4174	14.069	1535.6	2699.1
2366.5	22.665	514.46	4163.1	26.1	1537.7	2701.4
2365.7	16.363	446.41	4154.4	29.199	1530.8	2675.3
2364.8	7.0904	509.22	4152.7	14.451	1485.3	2644.6
2363.9	27.553	512.55	4116	-68.681	1514.1	2615.4
2363.1	15.307	483.16	4114	14.681	1504.2	2605.2
2362.2	38.731	519.18	4106.3	17.763	1482.5	2603
2361.4	41.345	564.08	4092.1	-80.194	1478.6	2558.4
2360.5	-6.548	537.67	4088.5	86.296	1537.1	2607
2359.6	34.688	552.84	4082.3	3.206	1577.7	2671.7
2358.8	1.6619	541.28	4078.9	98.332	1487.7	2709.2
2357.9	16.156	580.19	4072.6	21.199	1507.5	2747.6
2357.1	-2.011	494.41	4104.1	12.374	1521.4	2742.1
2356.2	3.573	491.75	4102.9	54.002	1514.5	2732.7
2355.4	29.927	587.03	4115.4	83.74	1519.5	2688.5
2354.5	-11.969	542.81	4101.5	18.52	1542.3	2680.3
2353.6	-12.32	498.61	4111.7	-2.1841	1532.4	2658.4
2352.8	5.1226	510.77	4126.8	-13.99	1543.4	2648.2
2351.9	7.7327	522.92	4120.5	57.235	1527.6	2687.3
2351.1	57.776	493.56	4145.1	72.096	1526.6	2678.5
2350.2	4.0555	550.16	4154.9	107.7	1513.8	2657.1
2349.3	-22.973	583.03	4156.5	-10.826	1545.4	2666.5
2348.5	-23.324	455.89	4186.4	69.213	1473.4	2646.2
2347.6	20.76	521.34	4182.9	54.416	1505	2640
2346.8	-3.296	557.14	4174.1	18.887	1489.2	2606.2
2345.9	-15.497	539.63	4169.1	-58.087	1544.6	2556.8
2345	58.166	575.41	4165	-10.689	1484.4	2533
2344.2	25.235	513.49	4179.7	69.249	1557.4	2530.3
2343.3	15.993	578.84	4190.3	24.846	1518	2562.8
2342.4	12.672	519.9	4199.8	33.721	1493.3	2569.8
2341.6	30.061	614.81	4200.9	57.377	1507.2	2599
2340.7	6.0325	520.37	4179.4	128.35	1535.8	2648.2
2339.9	11.586	544.26	4191.3	86.909	1525.9	2672.6
2339	43.748	585.87	4169.9	98.699	1536.8	2724.7
2338.1	-12.789	532.87	4184	33.621	1497.4	2712.9
2337.3	7.5416	544.91	4179.3	92.701	1523	2681
2336.4	7.1784	486.02	4187.5	12.863	1554.5	2701.2
2335.5	59.996	453.73	4211.3	-16.723	1518.1	2696.4
2334.7	24.175	518.94	4223	-7.8999	1508.3	2683.8
2333.8	23.807	525.05	4257.6	74.749	1465.9	2700.1
2333	11.628	560.68	4269.4	77.637	1506.3	2693.2
2332.1	34.88	593.34	4303.9	6.7093	1511.2	2724.8
2331.2	34.51	587.61	4336.3	6.6482	1519.1	2757.9
2330.4	4.6272	608.44	4320.8	183.65	1515.2	2766
2329.5	72.124	626.3	4337.8	133.38	1596.8	2740.9
2328.6	95.345	540.91	4314.9	97.879	1592.9	2740.8
2327.8	112.66	603.01	4320.9	103.68	1568.3	2692.1
2326.9	35.599	594.32	4327.5	79.98	1590.9	2647.7
2326	58.812	591.52	4305.5	29.751	1504.4	2632.9
2325.2	70.224	615.24	4249.1	67.969	1577.1	2636
2324.3	2.059	494.54	4193.7	23.648	1514.2	2635.6
2323.4	4.6374	527.11	4147.1	35.324	1486.7	2656.7
2322.6	21.944	530.2	4133	-17.821	1494.5	2679
2321.7	-1.9923	450.81	4097.4	99.884	1540.6	2676.6
2320.8	-14.14	498.08	4110.2	34.958	1522	2700.2
2320	11.992	533.55	4105.1	-29.95	1491.5	2722.1
2319.1	-8.9869	524.84	4107.9	43.52	1487.6	2662.6
2318.2	34.793	483.76	4117.2	28.66	1477.8	2704.7
2317.4	7.9311	572.17	4140.2	52.054	1476.8	2737.4
2316.5	4.6165	548.74	4149.1	81.321	1508.2	2728.9
2315.6	24.834	481.19	4183.1	113.51	1489.5	2722.6
2314.8	6.8118	560.71	4222.4	72.159	1532.6	2715
2313.9	9.3783	522.58	4221.3	13.178	1516.9	2719.3
2313	-17.455	581.47	4227.2	48.289	1530.6	2697.7
2312.2	35.082	452.23	4239.8	101.01	1494.3	2681.9
2311.3	25.885	514.04	4237.7	92.005	1552.1	2684.3
2310.4	34.32	531.76	4273.1	27.167	1556.9	2656.9
2309.6	42.752	631.71	4266.7	106.29	1541.2	2678.8
2308.7	36.494	502.54	4249.6	9.1594	1490.3	2697.3
2307.8	12.62	449.76	4227.1	88.247	1477.5	2703.5
2307	53.344	561.4	4213.8	20.506	1564.6	2740.2
2306.1	23.604	505.69	4210	79.002	1496.1	2757.2
2305.2	8.5491	532.16	4213.2	28.885	1480.4	2727.9
2304.4	11.104	564.49	4207.4	125.49	1461.8	2679.8
2303.5	7.7908	453.05	4225.6	-53.702	1475.4	2686.4
2302.6	27.943	532.31	4207.9	22.344	1503.7	2714.1
2301.8	-1.7666	523.55	4210.2	66.095	1508.6	2718
2300.9	-13.873	588.09	4192.6	80.509	1495.8	2773.2
2300	6.2697	582.24	4183.5	-16.483	1535.9	2775
2299.1	32.266	535.37	4163.5	21.375	1479.1	2775.1
2298.3	-3.2838	541.25	4197.2	47.494	1533.8	2776.3
2297.4	-35.891	550.05	4208.4	111.68	1538.6	2741.4
2296.5	-4.0449	506.13	4210.9	52.818	1452.6	2687.3
2295.7	33.646	506.14	4250.9	-3.0983	1475.1	2628.3
2294.8	-7.7352	509.08	4233.9	78.615	1509.2	2630.6
2293.9	-2.2615	573.48	4244.2	75.397	1540.3	2623.4
2293.1	26.624	570.54	4264.6	89.737	1533.4	2657.2
2292.2	20.383	561.75	4251	150.88	1561.7	2733.6
2291.3	31.698	550.03	4229.6	21.834	1475.8	2729.6
2290.4	-21.346	617.28	4226.7	18.608	1512.8	2748.9
2289.6	27.991	558.75	4226.2	24.153	1581.9	2753.9
2288.7	21.752	535.33	4224.5	23.843	1499	2755.7
2287.8	-10.796	514.83	4213.3	73.227	1471.7	2766.6
2286.9	12.203	546.95	4204.3	78.745	1511.5	2720.8
2286.1	11.814	567.36	4182	-29.721	1487.1	2699.6
2285.2	-0.26293	619.91	4155.6	-12.508	1515.3	2702.1
2284.3	5.1917	485.46	4156	86.486	1514.3	2719
2283.5	-1.039	514.63	4118.5	-24.853	1478.2	2753.2
2282.6	24.854	552.53	4130.1	103.3	1512.2	2762.9
2281.7	-4.7363	479.48	4171.5	0.7442	1484.8	2784.9
2280.8	-10.963	494.01	4196.4	108.4	1504.2	2780.3
2280	0.32263	488.11	4204.4	72.998	1479.8	2758.9
2279.1	26.193	514.3	4219.9	101.8	1566.3	2752.4
2278.2	-38.385	505.48	4233.8	19.73	1521.5	2725.6
2277.3	34.15	607.48	4210.5	138.94	1523.4	2726.5
2276.5	-39.154	645.29	4250.3	68.549	1469.8	2728.9
2275.6	7.1117	543.13	4278.3	1.0961	1559.2	2715.8
2274.7	3.802	519.7	4289.4	187.27	1479.4	2724.3
2273.8	6.3221	566.23	4286.5	76.093	1562.8	2725.4
2273	5.9268	493.27	4320.1	81.51	1480.2	2739.1
2272.1	-0.29564	536.87	4339.1	19.911	1455.8	2687.7
2271.2	-0.6909	525.1	4330.9	80.668	1504.3	2680.6
2270.3	36.773	539.54	4314.7	54.031	1509.1	2698
2269.5	4.3413	548.15	4299.3	47.779	1516.7	2742.7
2268.6	15.588	524.72	4273	32.791	1498.2	2790.7
2267.7	44.294	524.59	4257.3	44	1526.2	2811.8
2266.8	-8.4927	608.84	4244.4	72.657	1507.7	2833.4
2266	43.482	489.39	4218.5	40.202	1495	2834.8
2265.1	11.076	524.16	4225.1	-24.246	1511.4	2791.9
2264.2	-18.409	553.09	4224.1	-4.3321	1484.1	2750
2263.3	56.798	619.81	4211.2	85.357	1558.7	2651.1
2262.5	27.315	520.78	4174.3	-8.1491	1499.5	2613.7
2261.6	21.096	511.9	4152.3	5.9232	1524.5	2583.3
2260.7	-5.4649	607.63	4153.5	51.949	1482.8	2596.6
2259.8	34.812	488.31	4141.1	25.318	1505	2626.2
2258.9	8.2585	581.1	4146	100.36	1532.9	2663.1
2258.1	-29.903	592.52	4171.3	108.57	1581.2	2687.3
2257.2	-4.166	528.43	4186.1	32.562	1504.6	2718.5
2256.3	24.464	496.3	4177.8	32.059	1544.2	2709.1
2255.4	61.791	609.32	4204.7	17.041	1575	2728.7
2254.5	-5.3764	638.12	4224.1	-9.5879	1565.2	2725.5
2253.7	26.137	545.04	4219.1	91.461	1503.2	2731
2252.8	5.4187	617.35	4226.4	59.016	1534	2756.9
2251.9	-6.5907	582.31	4218.4	41.082	1489.4	2773.2
2251	10.403	561.77	4226.4	-75.452	1537.6	2755.1
2250.2	7.0944	552.84	4222.5	-41.173	1475.7	2733.8
2249.3	24.078	610.58	4248.1	-4.0173	1503.6	2721.6
2248.4	23.665	601.63	4261.8	99.78	1488	2707
2247.5	8.7624	589.79	4249.9	81.829	1521.7	2707.2
2246.6	25.734	496.82	4275.6	20.418	1494.5	2717.4
2245.8	19.526	418.36	4281.6	51.722	1548.4	2710.8
2244.9	-4.0575	542.66	4256	77.213	1469.1	2710
2244	67.92	513.44	4244	73.739	1505.7	2771.2
2243.1	-13.564	568.18	4247.6	47.098	1524.9	2776
2242.2	12.076	550.54	4235.2	14.67	1526.7	2768.9
2241.3	14.554	576.3	4250	37.236	1514	2773.1
2240.5	14.138	512.36	4292.5	10.604	1599.7	2778.8
2239.6	31.077	535.22	4293.1	177.78	1500.2	2759.8
2238.7	4.6273	543.61	4299.1	-33.975	1510.7	2777.1
2237.8	18.669	528.85	4319.2	49.284	1558.7	2747
2236.9	35.596	557.47	4318.2	71.795	1534.5	2744.9
2236.1	-8.1846	473.33	4313.9	24.918	1547.8	2759
2235.2	-5.7098	556.84	4322.8	30.075	1552.5	2762.5
2234.3	45.882	553.63	4317.6	104.57	1505.1	2729
2233.4	28.122	550.42	4334.3	60.586	1544.5	2706.4
2232.5	16.145	477.89	4328.9	143.7	1534.7	2669.8
2231.6	21.498	569.97	4340.9	108.38	1507.6	2645.6
2230.8	3.7514	592.73	4307.3	70.179	1515.1	2653.7
2229.9	3.3305	563.52	4291.2	83.95	1496.7	2676.7
2229	8.6808	606.45	4303.7	77.506	1538.9	2704.1
2228.1	11.143	600.32	4276.9	105.68	1546.4	2738.5
2227.2	10.719	599.96	4264.5	-1.7424	1493.3	2764.5
2226.3	27.6	553.43	4244.8	-2.4121	1492.2	2761.9
2225.5	50.241	561.72	4254	25.748	1548.8	2777.4
2224.6	46.925	558.46	4263.1	94.261	1507.3	2775.4
2223.7	46.491	592.68	4288.5	133.91	1555.2	2786.2
2222.8	40.293	586.52	4311.2	-10.91	1533.9	2802
2221.9	-14.89	548.67	4286.2	77.723	1512.6	2837.6
2221	4.8528	585.73	4279.1	102.93	1548.9	2857.3
2220.2	33.23	545	4275.8	38.837	1542	2874.6
2219.3	9.7563	512.92	4271.6	35.236	1483.3	2876.5
2218.4	-10.829	552.84	4271	2.8382	1545.5	2851.2
2217.5	11.774	540.91	4273.1	25.145	1495.4	2849.1
2216.6	-20.318	621.09	4239	21.534	1569.1	2823.4
2215.7	-17.866	591.87	4223	12.161	1591	2789.8
2214.8	4.7235	562.67	4225.3	169.66	1543.8	2792.9
2213.9	12.921	567.99	4222.7	22.181	1548.4	2749.4
2213.1	67.13	541.66	4195.6	-41.845	1481.1	2715.2
2212.2	-8.0766	549.85	4184	6.2911	1523.1	2728.1
2211.3	37.49	621.28	4162	71.653	1524.8	2719.8
2210.4	19.803	623.69	4165.8	90.993	1555.3	2718
2209.5	53.85	608.85	4184.6	29.858	1534.1	2684.1
2208.6	1.6865	502.07	4208.6	152.62	1492.7	2727.1
2207.7	-24.603	599.28	4213.5	137.45	1514.5	2732.2
2206.9	43.895	538.49	4231.3	41.859	1473.2	2792.5
2206	31.963	621.28	4246.1	43.929	1575.4	2832.9
2205.1	5.681	566.24	4254.7	57.481	1551.3	2797.5
2204.2	10.982	502.6	4251.8	177.23	1581.7	2779.9
2203.3	4.8014	611.17	4240.8	81.678	1517.4	2792.2
2202.4	-24.332	495.89	4274.8	29.202	1590.8	2754.1
2201.5	-19.03	592.94	4288.5	57.067	1549.5	2716.7
2200.6	0.61014	575.22	4297.1	59.103	1557	2680.8
2199.7	63.257	580.43	4313.8	138.56	1498.4	2711.4
2198.9	22.663	508.23	4304.9	25.879	1534.6	2731.6
2198	42.281	401.66	4309.6	128.23	1464.6	2761.4
2197.1	24.634	581.72	4326.4	29.92	1558	2776.8
2196.2	41.377	566.85	4306.6	14.739	1479.5	2763.7
2195.3	15.141	603.55	4294.4	102.7	1509.8	2760
2194.4	3.2346	557.17	4286.5	93.222	1480	2758.9
2193.5	42.88	556.62	4273.3	86.611	1513.3	2775.8
2192.6	22.383	530.3	4292.4	82.862	1517.8	2697.7
2191.7	44.832	512.57	4278	41.894	1516.6	2650.5
2190.8	10.03	471.94	4281.3	-44.856	1529.8	2650.8
2189.9	29.61	534.34	4264.3	120.24	1508.6	2629.1
2189.1	3.4055	573.82	4264.4	19.189	1530.3	2614.6
2188.2	25.838	553.22	4243.5	118.41	1577.8	2677.8
2187.3	45.401	546.91	4246.8	71.723	1548	2702.4
2186.4	-12.247	609.22	4217.5	-49.292	1541.1	2712.2
2185.5	15.891	520	4200.3	221.39	1517	2752.9
2184.6	26.868	642.3	4245.1	0.34695	1567.3	2808.5
2183.7	29.267	621.68	4233	93.731	1500.4	2767.7
2182.8	31.664	501.05	4245	67.072	1567.8	2769.9
2181.9	28.346	583.29	4242.7	80.41	1478	2759.3
2181	30.74	508.4	4224.5	65.174	1454	2728.9
2180.1	30.277	484.94	4229.3	27.099	1512.8	2727.4
2179.2	44.088	558.55	4242.4	68.968	1568.7	2736.6
2178.3	40.767	577.89	4259.6	50.875	1519	2695.4
2177.5	6.0548	523.02	4272.4	69.883	1523.5	2687
2176.6	19.86	613.68	4266.1	37.521	1536.6	2714.6
2175.7	5.1329	456.11	4273.6	16.578	1495.5	2763.9
2174.8	-1.0337	535.33	4258.5	21.303	1522.8	2759.9
2173.9	-4.3466	563.19	4235.6	131.53	1498.8	2785.4
2173	23.702	622.39	4245.3	-49.092	1534.7	2786.4
2172.1	37.487	573.24	4247.7	-15.865	1502.1	2785.6
2171.2	48.415	569.71	4223.9	82.891	1546.5	2761.6
2170.3	8.0495	560.47	4195.9	-3.6083	1539.6	2765
2169.4	-12.359	554.08	4187.9	52.366	1484.3	2752.2
2168.5	41.294	527.74	4163.1	-11.317	1466	2783.9
2167.6	9.4942	578.3	4180.7	161.38	1481.9	2844.1
2166.7	26.108	551.97	4214.3	80.608	1523.4	2870.3
2165.8	-2.8324	525.63	4211.2	51.097	1545	2832.7
2164.9	30.852	576.15	4217.4	58.596	1481.2	2838.9
2164	21.839	521.35	4203.5	-2.2085	1482.8	2819.8
2163.1	24.21	591.76	4221.4	16.668	1470.3	2771.4
2162.2	32.266	556.87	4242.3	72.503	1528.8	2701.4
2161.3	-27.933	519.16	4242.3	60.062	1521.9	2649.9
2160.4	5.7188	629.31	4271.5	67.525	1569	2669.6
2159.5	22.3	503.46	4284.1	114.77	1485.4	2720.1
2158.7	-12.285	656.2	4297.7	73.897	1521.1	2805.2
2157.8	9.9753	587.21	4302.7	101.23	1528.4	2833.5
2156.9	15.179	523.93	4293.9	88.765	1493.1	2844.8
2156	0.49636	614.06	4332.9	59.256	1551.5	2846
2155.1	36.939	508.19	4340.8	21.239	1564.5	2839.8
2154.2	-17.497	530.13	4321.7	88.286	1563.3	2782
2153.3	4.7389	543.54	4265	67.302	1528	2741
2152.4	24.126	508.68	4249.7	114.44	1575	2713.6
2151.5	32.154	541.94	4239.2	62.222	1545.4	2715
2150.6	25.991	484.39	4243.1	78.121	1493.1	2692.2
2149.7	-11.373	616.92	4243.7	28.765	1571.3	2690.4
2148.8	13.671	525.33	4253.6	19.126	1456.6	2684.9
2147.9	7.5129	467.8	4233.6	60.526	1560.3	2671.4
2147	18.367	580.38	4222.3	39.535	1576.1	2642.1
2146.1	20.712	454.83	4216.7	86.575	1557.9	2611.1
2145.2	8.8853	575.86	4219.8	-2.441	1511.3	2660.1
2144.3	31.064	532.51	4219.8	186.25	1504.4	2695.5
2143.4	-17.589	622.31	4221.8	46.248	1511.7	2738.6
2142.5	4.5836	516.64	4251.9	98.892	1530.3	2704.5
2141.6	-24.224	555.43	4271.6	63.727	1526.2	2742.2
2140.7	46.069	625.34	4254.5	73.87	1578.7	2740.5
2139.8	3.1091	584.82	4249.9	18.897	1520.9	2735.5
2138.9	25.257	581.1	4259.9	77.147	1542.3	2715.5
2138	-12.025	467.03	4259.7	50.48	1512.7	2685.4
2137.1	49.721	655.7	4206.4	29.476	1531.3	2662.6
2136.2	12.446	533.15	4187.3	121.61	1527.2	2714.8
2135.3	40.227	540.74	4186.5	126.04	1542.9	2692.9
2134.4	19.932	573.76	4193.6	37.167	1572.8	2731.3
2133.5	8.1232	454.11	4181	30.294	1537.6	2716.5
2132.6	-37.596	586.04	4207.5	12.114	1522.2	2726.4
2131.7	15.6	539.9	4208.3	81.533	1472.9	2691.5
2130.8	20.747	544.62	4229.6	-7.2873	1511.2	2690.9
2129.8	3.2946	495.66	4245.7	93.165	1484.6	2733.1
2128.9	-25.448	494.73	4266.6	86.261	1559.6	2719.2
2128	36.171	550.26	4289.1	82.183	1518.8	2781.1
2127.1	32.838	515.43	4315.9	117.62	1537.3	2818.2
2126.2	23.86	576.56	4345	121.98	1572.7	2831.4
2125.3	26.172	544.55	4350.7	13.476	1486.8	2854.1
2124.4	17.197	616.93	4356	88.389	1502.5	2807.5
2123.5	-14.341	477.73	4359.9	53.255	1523.8	2730.9
2122.6	7.715	640.32	4338.7	-35.454	1547.9	2695.4
2121.7	4.3852	478.6	4347	16.85	1484.6	2701.2
2120.8	-15.859	635.48	4345.2	-88.741	1466.4	2700.1
2119.9	6.1819	555.54	4325.2	2.999	1445.4	2681.6
2119	16.942	506.63	4295.3	74.977	1483.6	2711.5
2118.1	-3.2961	505.62	4300.7	115.93	1552.8	2736.7
2117.2	15.91	521.51	4278.1	66.714	1548.7	2773.2
2116.3	-4.3218	635.96	4240.6	113.27	1564.3	2791.7
2115.4	3.6112	584.23	4225.4	44.357	1489.8	2747.8
2114.5	3.0949	549.4	4233	3.6197	1547.7	2732.1
2113.6	19.466	613.09	4221.4	52.96	1495.7	2744.3
2112.7	-20.454	538.86	4236.9	71.322	1528.2	2802
2111.8	26.863	605.34	4256.3	123.43	1569.2	2825.3
2110.8	3.8337	629.58	4262.7	17.991	1466.6	2854.5
2109.9	39.875	541.31	4273.2	131.96	1530	2807.9
2109	14.038	557.11	4309.2	26.544	1525.9	2817
2108.1	13.513	662.86	4323.5	165.76	1592.1	2819.7
2107.2	24.231	602.73	4334	192.48	1540.2	2796.9
2106.3	20.892	486.4	4357.4	75.854	1513.6	2723.5
2105.4	48.461	409.45	4371.4	68.854	1551.7	2683.1
2104.5	61.971	534.79	4384.7	67.467	1491.4	2687.7
2103.6	16.493	452.23	4411.2	49.224	1484.5	2716.2
2102.7	1.9221	577.5	4412.9	5.7149	1536.5	2733.6
2101.8	-26.683	581.99	4409.1	60.475	1568.9	2756.7
2100.9	26.126	538.75	4397.7	106.79	1522.7	2760.8
2100	8.7515	515.16	4384.5	96.957	1451.3	2833.9
2099	-31.065	612.24	4343.6	39.417	1469.6	2856.3
2098.1	-11.954	468	4322.2	4.3378	1459.9	2821.1
2097.2	12.758	503.33	4303.9	5.7306	1514.7	2793.4
2096.3	9.4173	533.03	4314	49.183	1510.6	2755.7
2095.4	-33.176	540.28	4324.1	109.44	1486.9	2773.5
2094.5	-22.493	541.91	4328.5	40.71	1527.6	2782.7
2093.6	-0.60467	509.91	4315.1	36.472	1534.7	2813
2092.7	35.284	536.76	4280.9	1.4039	1511	2815.6
2091.8	29.135	541.17	4255.5	100.82	1543.3	2798
2090.9	0.57936	567.99	4266.9	18.127	1525.2	2785.9
2090	50.446	533.18	4240.9	137.09	1551.9	2741.1
2089	-14.504	489.98	4227	60.014	1497.3	2679.8
2088.1	38.144	530.76	4222.8	33.348	1526.8	2667
2087.2	1.2076	658.29	4176.9	124.24	1573.1	2629.3
2086.3	11.855	505.94	4188.7	119.95	1504.6	2626.5
2085.4	-33.457	482.33	4194.1	76.48	1514.5	2633.5
2084.5	-17.214	520.27	4177.4	35.828	1496.4	2660.6
2083.6	15.801	555.39	4154.5	-13.207	1464.3	2643.4
2082.7	1.2681	540.15	4134.8	44.025	1493.7	2628.8
2081.7	14.696	600.4	4131.9	22.955	1559.5	2608.7
2080.8	2.9618	504.1	4117.4	54.993	1519	2624.6
2079.9	7.9983	508.43	4146	3.1815	1545.7	2613.9
2079	49.352	518.34	4195.7	49.168	1547.1	2605.5
2078.1	-15.459	472.36	4250.1	-19.395	1453.6	2640.9
2077.2	-7.6326	566.05	4272.1	68.462	1494.2	2626.5
2076.3	11.359	534.04	4243.6	36.212	1509.6	2633
2075.4	21.967	468.53	4228.4	34.68	1522.2	2678
2074.4	10.239	553.76	4217.8	21.976	1534.8	2723.3
2073.5	-18.228	577.57	4186.1	73.46	1486.1	2753.2
2072.6	23.067	587.4	4196.5	94.226	1498.7	2767.2
2071.7	22.501	477.28	4163.6	70.346	1555.9	2754
2070.8	5.2006	473.17	4164.7	63.201	1560.1	2702.5
2069.9	-39.979	510.89	4142	64.424	1483.5	2686.6
2069	29.162	392.45	4117.6	140.91	1501.7	2694.8
2068	6.2926	510.99	4115.1	22.251	1575.6	2630.9
2067.1	-13.783	512.43	4108	109.86	1518.5	2617.6
2066.2	10.729	460.92	4080.3	41.391	1547.8	2615.2
2065.3	-0.98376	554.28	4077.5	101.09	1543.6	2686.7
2064.4	26.299	488.84	4097.1	60.496	1553.4	2736.6
2063.5	39.647	493.05	4136.9	42.192	1485.2	2810.1
2062.6	47.42	564.05	4182.1	51.728	1503.4	2839.1
2061.6	-11.616	654.51	4234.1	116.93	1488.1	2824.8
2060.7	40.689	447.14	4273.4	81.904	1564.7	2827.3
2059.8	-1.6301	623.84	4288.1	49.677	1454.8	2764.3
2058.9	56.215	569.55	4265.2	34.146	1534.1	2745.2
2058	19.47	498.59	4236.5	174.38	1477.1	2715.8
2057.1	13.327	533.33	4235.7	-44.18	1562	2658.3
2056.1	32.207	515.21	4190.6	65.413	1471.6	2665.5
2055.2	12.163	472.08	4136.9	-2.9408	1531.4	2660.4
2054.3	-30.109	506.78	4109.4	-21.25	1527.3	2670.1
2053.4	8.2167	547.02	4089.1	-6.2086	1517.6	2685.3
2052.5	18.744	537.23	4109.9	67.159	1471.7	2638.4
2051.5	-1.2862	596.87	4098.3	48.835	1525.9	2640.6
2050.6	3.6826	592.61	4102	11.07	1541.2	2640.7
2049.7	-13.563	602.23	4105.6	53.838	1478.7	2688.5
2048.8	-22.475	475.82	4155.5	-33.888	1510.7	2734.1
2047.9	26.897	460.46	4166.4	-16.119	1478.8	2757.8
2047	34.627	592.17	4199.8	1.6392	1560.6	2808.3
2046	28.482	438.08	4230.8	-66.617	1512.1	2825.3
2045.1	36.206	514.25	4270.9	53.765	1538.4	2821.4
2044.2	24.513	432.32	4285.1	54.844	1550.9	2830.3
2043.3	43.323	594.41	4284.2	17.101	1519	2788.5
2042.4	-4.4058	534.66	4254.3	65.309	1537	2759.4
2041.4	3.3134	563.61	4237.7	152.29	1510.7	2707.4
2040.5	58.137	509.41	4180.5	-4.6195	1506.5	2624.4
2039.6	7.6586	446.92	4155.4	49.089	1524.5	2601.6
2038.7	18.138	655.9	4099.5	30.75	1545.3	2566.9
2037.8	34.15	482.61	4024.2	17.953	1552.2	2566.7
2036.8	-5.222	503.21	4016.1	-33.608	1500.9	2549.8
2035.9	-14.128	498.87	4002.2	-71.31	1535.5	2608.4
2035	-0.8905	455.78	4033.4	65.365	1500.9	2685.2
2034.1	15.109	520.63	4050.1	5.5118	1565.9	2738.2
2033.1	44.934	535.64	4045.9	42.509	1528.5	2764.2
2032.2	11.124	495.31	4078.4	-20.094	1474.6	2762.7
2031.3	29.873	471.59	4105	44.542	1520.2	2721.4
2030.4	4.3724	622.07	4121.4	-45.699	1527.1	2699.2
2029.5	78.404	437.98	4123	27.203	1517.4	2613.9
2028.5	41.845	450.19	4124.9	42.024	1482.8	2556.7
2027.6	2.5364	520.42	4168	31.964	1561.5	2570.9
2026.7	-6.3663	601.68	4191	2.5648	1438.5	2590.9
2025.8	-15.267	475.71	4179.2	64.331	1508.9	2635
2024.8	-2.0706	540.35	4164.9	120.54	1515.8	2657.2
2023.9	52.539	472.43	4148.4	77.324	1450.9	2735.1
2023	4.9779	512.19	4143.7	12.029	1510.2	2783.8
2022.1	7.118	546.4	4151.6	-20.121	1514.3	2788.7
2021.1	31.333	566.8	4145.7	8.4507	1496.3	2748
2020.2	-2.4038	589.94	4124.4	-45.771	1489.4	2693.9
2019.3	10.767	591	4129.3	128.99	1496.2	2689.3
2018.4	37.722	487.24	4160.8	44.421	1497.6	2748.1
2017.5	-4.2728	485.55	4147.3	-20.816	1543	2749.7
2016.5	30.943	508.66	4183.9	90.413	1489.2	2749.9
2015.6	5.502	551.05	4194	52.749	1504.3	2754.9
2014.7	-3.3951	422.55	4231.9	-15.223	1530.4	2773.2
2013.7	-12.29	478.71	4224.9	38.062	1531.7	2713
2012.8	33.913	647.78	4215.4	-16.114	1502.7	2678.3
2011.9	19.504	549.61	4178	70.194	1523.3	2642.8
2011	2.3454	440.47	4179.1	43.564	1530.1	2656.7
2010	7.2177	507.56	4176.1	60.99	1481.9	2665.2
2009.1	31.355	541.59	4212	17.844	1524.5	2716.4
2008.2	-2.3127	512.29	4224.9	-11.528	1528.5	2746
2007.3	24.566	441.73	4210.8	121.45	1576.6	2707.7
2006.3	-28.346	621.53	4200.9	50.796	1525.6	2690.8
2005.4	23.279	471.2	4211.8	21.424	1524.2	2691.5
2004.5	-26.865	485.92	4203.7	-29.944	1489.7	2634.6
2003.6	46.731	528.11	4231.7	83.668	1507.5	2654.2
2002.6	-17.144	534.55	4214	87.282	1541.8	2682.7
2001.7	-6.792	527.24	4224.6	-27.294	1463.4	2704.3
2000.8	25.537	511.68	4245	132.95	1445.4	2708.1
1999.8	55.105	493.37	4228.8	1.9261	1531.9	2740
1998.9	2.26	538.24	4239.7	41.238	1494.7	2716.1
1998	26.326	503.44	4280.6	11.878	1496	2675.2
1997.1	-7.2763	583.96	4272.2	199.43	1541.2	2675.8
1996.1	22.27	458.57	4277.7	-33.094	1487.6	2678.4
1995.2	-5.8323	528.08	4243.3	0.6874	1557.5	2612.5
1994.3	1.7477	548.16	4231	174.4	1509.3	2671.2
1993.3	72.422	477.7	4175.9	40.769	1472.2	2694.3
1992.4	14.151	440.17	4203.5	71.763	1481.7	2711.3
1991.5	10.749	452.01	4184.1	39.666	1524.1	2721
1990.6	4.6051	557.06	4228	40.477	1528.1	2761.2
1989.6	39.582	615.46	4246.7	46.77	1529.3	2685.9
1988.7	27.951	476.5	4230.1	-4.5018	1445.6	2695.1
1987.8	21.803	493.78	4235.1	53.851	1581.2	2725.6
1986.8	10.178	606.93	4251.2	-24.805	1500.2	2716.9
1985.9	17.729	498.16	4270.3	22.566	1515.2	2732.2
1985	38.969	575.65	4277.5	53.479	1489	2801.8
1984	19.129	576.44	4297.1	103.55	1504	2814.1
1983.1	4.7705	470.45	4314.6	-79.1	1543.5	2852.6
1982.2	-61.586	553.36	4323.4	42.126	1528.4	2903.3
1981.2	6.1664	603.38	4319.1	1.8463	1537.8	2905.6
1980.3	10.966	549.42	4343.2	128.47	1544.5	2878.3
1979.4	23.969	506.41	4350.6	25.273	1532	2887.8
1978.4	20.556	646.64	4340.1	67.06	1563.4	2849.5
1977.5	-12.933	587.21	4362.1	13.124	1477.1	2824.5
1976.6	27.399	571.53	4363.8	115.02	1505.6	2783.1
1975.6	43.116	501.19	4324.8	28.294	1534.2	2728.8
1974.7	-6.7575	439.08	4285.9	42.704	1562.8	2730.3
1973.8	-12.9	592.81	4265.4	136.33	1514.8	2710
1972.8	-8.1143	525.22	4237.2	93.342	1524.2	2740.3
1971.9	-36.105	558.69	4243.6	126.83	1487.2	2726.4
1971	45.135	575.76	4211.6	92.044	1507.5	2739.6
1970	-1.9672	532.76	4207.6	84.567	1519.6	2763.4
1969.1	16.454	620.78	4210.5	104.38	1499	2761.8
1968.2	15.765	512.28	4212.6	126.91	1546.6	2754.1
1967.2	-1.296	532.05	4208.8	51.212	1501.4	2702.9
1966.3	-10.168	396.32	4187.2	98.29	1499.9	2729.4
1965.4	-8.1277	500.64	4226.2	49.892	1517.5	2737.9
1964.4	4.8165	435.85	4250.7	-31.216	1545.9	2735.8
1963.5	-28.591	450.13	4258.8	34.921	1484.4	2779.9
1962.6	6.155	573.43	4272.1	79.223	1526.5	2772.9
1961.6	8.1847	497.74	4288.6	139.86	1467.7	2753.9
1960.7	10.212	511.99	4305.4	-20.231	1526.1	2828.2
1959.8	20.409	569.81	4284.5	154.8	1535.5	2833.7
1958.8	-40.21	584.02	4325.7	60.126	1504	2812.4
1957.9	35.342	546.48	4306.2	-23.62	1488.8	2809.1
1956.9	23.745	587.9	4284.6	-69.221	1528.1	2814.7
1956	44.815	517.7	4278.5	40.342	1570.1	2750.5
1955.1	6.0036	521	4275	0.17963	1555	2753.1
1954.1	16.182	513.41	4296	-4.5948	1509.9	2694.8
1953.2	4.593	456.84	4288.8	45.031	1505.6	2650.7
1952.3	22.924	596.11	4328.1	121.83	1506.8	2634.4
1951.3	-2.2611	468.84	4326.9	40.882	1524.2	2671.8
1950.4	29.655	480.27	4334.2	-29.161	1520	2703.9
1949.4	-47.169	548.76	4344.7	118.27	1510.3	2753.3
1948.5	44.528	486.77	4323	42.794	1495.1	2822.4
1947.6	-18.685	625.87	4330.1	143.96	1523.4	2803.8
1946.6	21.354	580.17	4329.8	122.83	1559.9	2798.3
1945.7	53.227	458.45	4327.8	36.528	1509.4	2812.7
1944.8	11.769	453.52	4307	4.5609	1529.6	2713.4
1943.8	-2.525	538.19	4296.9	67.626	1547	2689.5
1942.9	32.045	592.95	4279.2	16.66	1510.2	2686.3
1941.9	28.606	582.56	4277	-53.286	1579.1	2613.4
1941	-34.527	498.9	4248	110.14	1583	2626.4
1940.1	81.408	586.17	4283.4	97.161	1557	2651.4
1939.1	23.713	594.76	4256.7	86.903	1533.7	2689.8
1938.2	25.696	540.95	4284.1	-58.944	1543	2724.6
1937.2	14.121	468.18	4271.7	69.093	1519.7	2789.1
1936.3	92.001	682.77	4270.8	83.226	1545.2	2853.7
1935.4	31.633	628.96	4264.6	26.892	1578.8	2829
1934.4	20.06	775.67	4285.8	95.214	1628.7	2893.6
1933.5	30.162	613.49	4291.9	11.8	1459.1	2880.4
1932.5	5.0491	632.83	4280.5	134.26	1611.9	2861.1
1931.6	-41.719	568.22	4303.9	-14.121	1558.9	2885.4
1930.6	22.534	685.01	4287.3	200.34	1546.5	2863.1
1929.7	43.451	636.64	4262.1	95.31	1580	2826.6
1928.8	18.349	623.46	4264.9	-52.99	1605.5	2780.4
1927.8	28.432	607.57	4256.7	218.17	1549.8	2757.6
1926.9	6.0469	607.92	4239.9	15.792	1559	2740.9
1925.9	40.468	648.82	4247.4	173.22	1579	2726.3
1925	15.382	676.19	4210.4	122.37	1542.2	2775.9
1924	47.082	700.83	4199.3	1.2289	1562.2	2755.8
1923.1	13.893	565.97	4199.6	104.5	1590.3	2788.9
1922.2	-11.177	612.23	4184.7	53.675	1529.3	2806.2
1921.2	58.334	609.83	4191.7	13.674	1595.2	2798.3
1920.3	52.174	561.5	4172.1	43.931	1523.3	2782.9
1919.3	48.715	688.74	4182.1	22.851	1494.7	2798.8
1918.4	34.455	570.18	4167.3	-17.127	1452.6	2808.3
1917.4	9.3994	708.16	4189.8	-62.491	1456.4	2824.6
1916.5	-15.647	562.64	4199.2	62.224	1527.6	2831.7
1915.6	40.28	633.08	4210.6	51.939	1544.9	2863
1914.6	1.7423	590.15	4214.1	1.1807	1492	2854.4
1913.7	46.851	730.68	4249.6	77.238	1485	2832.8
1912.7	29.903	609.52	4249	83.133	1561.6	2834.3
1911.8	10.264	580.09	4255.5	137.57	1546.4	2757.1
1910.8	14.897	628.85	4265.5	111.09	1515.1	2721.6
1909.9	54.57	575.15	4283.6	141.22	1473.1	2730.7
1908.9	64.58	526.86	4291.4	-25.398	1487.6	2710.6
1908	58.418	497.43	4244.8	34.389	1459	2678.7
1907	-44.731	416.83	4251	-2.835	1492.4	2710.2
1906.1	5.6922	567.9	4217.2	113.48	1525.8	2782.3
1905.1	23.778	508.84	4226.2	-53.013	1508	2796.9
1904.2	-36.226	619.43	4234.8	6.7213	1562.9	2820.7
1903.3	-1.9902	557.68	4253.4	131.04	1515.5	2870
1902.3	-2.7573	713.96	4236	-19.224	1513.8	2854.1
1901.4	26.074	420.78	4227.4	80.821	1479.9	2823.6
1900.4	-31.198	598.53	4253.5	113.57	1524	2813.5
1899.5	32.593	630.95	4284.1	33.329	1503.5	2814
1898.5	42.571	590.74	4282.8	160.19	1499.1	2795.1
1897.6	22.968	585.5	4274.3	79.968	1470.6	2809.2
1896.6	46.384	523.8	4284.6	-21.73	1425.9	2841.8
1895.7	-35.032	628.74	4331.5	209.88	1499.5	2845.7
1894.7	28.69	599.29	4347.7	207.61	1436.1	2847.3
1893.8	3.7274	548.34	4370.9	25.339	1555.3	2837.5
1892.8	-18.541	524.28	4371.5	109.06	1459.6	2794.9
1891.9	37.08	527.07	4368.3	42.356	1546.6	2753.8
1890.9	-17.409	586.23	4362.3	182.42	1569.1	2701.6
1890	48.925	481.61	4355.1	29.819	1494.9	2744.1
1889	29.344	591.75	4321.3	0.73658	1517.4	2767.1
1888.1	52.705	648.16	4332.7	111.2	1480.8	2750.2
1887.1	33.129	463.09	4318.6	15.034	1546.2	2777.9
1886.2	24.289	495.35	4325	26.203	1528.4	2811.6
1885.2	31.542	567.82	4326.9	82.951	1558.9	2779.4
1884.3	95.098	484.74	4307.7	45.831	1506.3	2733
1883.3	27.271	616.15	4271	132.04	1501.9	2712.6
1882.4	7.713	565.24	4263.9	81.519	1516.3	2711.8
1881.4	47.115	618.86	4287.4	140.89	1525.3	2715.4
1880.5	27.559	742.1	4274.3	71.622	1545.1	2798.7
1879.5	8.0088	600.11	4259.4	88.102	1505.9	2782.1
1878.6	42.028	576	4259.2	93.861	1485.4	2741
1877.6	59.966	567.96	4269.8	48.743	1376.6	2715.9
1876.7	-15.8	664.32	4288.7	17.026	1565	2724
1875.7	12.847	535.81	4285.5	95.054	1547.3	2724.5
1874.7	20.073	779.3	4314.9	47.278	1577.7	2714.5
1873.8	-7.4862	610.68	4304.8	95.835	1605.4	2695.7
1872.8	58.587	629.36	4293	104.25	1587.6	2728.3
1871.9	55.099	605.23	4312.9	35.1	1585.9	2785.2
1870.9	38.241	680.04	4333.5	-1.9397	1568.1	2805.3
1870	64.162	730.75	4338.4	75.986	1561	2769.6
1869	47.307	554.25	4335.6	6.8767	1564.7	2770.4
1868.1	-9.6267	775.98	4328.4	106.15	1525.5	2770.9
1867.1	21.629	636.93	4359.4	66.444	1625.3	2743
1866.2	42.185	543.34	4350.7	53.465	1511.4	2771
1865.2	-17.387	679.46	4336.8	29.812	1501.7	2778
1864.3	27.198	655.3	4328.4	171.71	1505.3	2733.7
1863.3	-16.333	700.57	4352.8	75.957	1554.3	2727.2
1862.3	36.238	564.3	4340.7	12.265	1525.8	2709
1861.4	-4.6105	630.9	4326.9	74.024	1553.5	2730.9
1860.4	29.26	601.42	4334.4	77.056	1589.1	2721.6
1859.5	4.4305	625.29	4341	-23.946	1579.3	2747.9
1858.5	-9.7219	574.47	4317.3	117.78	1521.6	2749.2
1857.6	58.789	558.33	4324.4	11.479	1498.5	2728.9
1856.6	4.6407	579.51	4311.9	174.47	1462.1	2763.5
1855.6	-25.499	579.35	4301.6	65.525	1433.7	2818
1854.7	18.988	584.52	4273.3	135.17	1496	2795.7
1853.7	-11.145	752.2	4249.1	130.18	1539.5	2763.9
1852.8	6.6803	509.58	4269.3	111.87	1548.4	2738.4
1851.8	5.8555	514.74	4259.3	29.65	1549.3	2743.5
1850.9	-5.6215	655.69	4246.2	117.87	1528.9	2703
1849.9	46.798	519.7	4239.3	142.17	1489.9	2684.8
1848.9	43.3	588.72	4256.4	129.19	1517.4	2659.4
1848	39.803	588.51	4265.4	49.69	1566.2	2667.9
1847	38.967	638.85	4292.3	246.92	1529.9	2694.8
1846.1	-1.7721	585.41	4310.7	31.758	1599.9	2755.9
1845.1	10.695	617.1	4317.5	-23.747	1571.6	2785.2
1844.2	9.8617	582.29	4344.5	141.47	1500.6	2828.7
1843.2	-1.6064	552.81	4349.2	27.473	1525.5	2839.9
1842.2	-10.413	536.62	4358.9	67.685	1558.3	2825.9
1841.3	-16.56	589.53	4323.2	75.988	1490	2802.3
1840.3	27.775	514.88	4286.2	49.747	1514.8	2761.3
1839.4	48.184	583.69	4239.3	-5.7044	1560.9	2727.5
1838.4	34.058	463.91	4205.6	-2.7058	1500.7	2750.8
1837.4	81.009	628.29	4167.8	21.534	1483	2736.9
1836.5	32.368	643.92	4151.6	93.545	1499.8	2754.9
1835.5	-2.9837	617.08	4127.4	168.18	1606.8	2782.6
1834.6	4.1373	473.48	4115.5	75.602	1490.9	2825.1
1833.6	5.9482	531.57	4109.1	49.39	1499.8	2767.6
1832.6	15.715	555.15	4124.5	65.63	1500.6	2766.4
1831.7	49.346	496.5	4112.3	4.947	1459.1	2770.2
1830.7	11.369	557.18	4134.5	90.126	1520.9	2809.9
1829.7	-37.198	490.59	4170.7	16.206	1564.2	2807.4
1828.8	-3.5789	545.94	4199.6	61.591	1509.4	2818.9
1827.8	6.1751	617.16	4266.4	114.91	1502.3	2801
1826.9	-15.87	497.58	4283.2	88.711	1497.9	2826.1
1825.9	-11.417	484.01	4305.5	59.882	1472.2	2824.8
1824.9	67.189	488.98	4343.4	44.301	1573.7	2795.1
1824	0.12706	430.38	4374.5	113.46	1566.6	2760.8
1823	68.107	565.06	4360.1	119.05	1501.3	2760.3
1822	-17.457	612.34	4357.7	238.46	1480.9	2757.9
1821.1	42.558	500.81	4364.8	95.823	1505.6	2772.6
1820.1	9.9464	553.36	4370.1	61.725	1487.9	2747
1819.2	11.735	632.34	4352.7	54.093	1549.6	2725.6
1818.2	5.5881	557.89	4344.5	91.425	1463.2	2744.4
1817.2	-3.2023	515.18	4372.3	4.4592	1522.2	2778.3
1816.3	-19.921	546.51	4367.2	76.149	1488.6	2744.9
1815.3	0.3701	654.48	4385.5	139.88	1452.5	2685.1
1814.3	31.223	585.34	4377.9	0.10486	1508.8	2715.6
1813.4	19.789	513.59	4392.2	40.048	1514.9	2696.2
1812.4	32.133	431.29	4361.4	-1.9145	1558	2683
1811.4	-32.12	602.55	4332	69.701	1545.6	2721.4
1810.5	40.959	488.57	4304.2	-6.5814	1440.8	2747.2
1809.5	50.648	498.7	4314.4	17.487	1520.8	2793.6
1808.5	7.5434	437.56	4316.3	168.24	1537.5	2809.1
1807.6	11.955	545.33	4311.3	163.23	1498.7	2827.1
1806.6	26.918	624.03	4291.9	60.603	1557.5	2765.3
1805.6	-2.9692	444.18	4289.9	-15.601	1460.7	2765.7
1804.7	19.9	596.7	4285.2	161.4	1472.1	2774.3
1803.7	29.577	559.31	4310.2	185.41	1559.9	2764.2
1802.7	15.522	635.29	4285	51.22	1494.8	2777.1
1801.8	-1.1652	629.52	4299.9	109.5	1503.5	2772.6
1800.8	8.5065	560.5	4315.6	25.445	1549.1	2769.7
1799.8	-0.26956	567.91	4303.4	-3.2431	1539.4	2781.6
1798.9	38.373	651.71	4298.2	76.083	1511.2	2796.7
1797.9	0.62163	564.27	4347.5	-42.152	1546.2	2842.6
1796.9	39.247	545.33	4351.8	89.814	1496.9	2825.8
1796	22.57	571.15	4398.8	37.44	1497.7	2866.3
1795	11.164	494.29	4408.3	90.371	1503.8	2806
1794	-0.23916	454.31	4431.3	43.281	1504.6	2783.9
1793.1	33.089	587.98	4421.3	122.5	1515.9	2803.2
1792.1	-1.9905	534.83	4401.3	35.958	1524.5	2818.2
1791.1	20.804	589.53	4393	7.3187	1504.3	2813.1
1790.1	9.4049	510.09	4426.5	178.53	1510.3	2826.3
1789.2	-4.6202	491.15	4405.9	115.69	1518.9	2829.9
1788.2	5.0164	622.03	4407.4	84.418	1488.2	2805.9
1787.2	43.555	624.08	4412.4	82.064	1512.6	2747.9
1786.3	19.02	526.29	4420.8	45.556	1521.2	2758.8
1785.3	-0.25259	546.74	4438.9	135.15	1508.9	2699
1784.3	27.756	535.67	4448.7	208.96	1457.1	2679.6
1783.3	-28.272	587.61	4414.3	70.039	1513	2769.9
1782.4	-23.899	576.52	4439.2	138.57	1482.2	2842
1781.4	38.217	625.79	4420.5	75.841	1525	2806.8
1780.4	26.829	588.45	4370.8	0.01366	1528.4	2838.5
1779.5	44.306	569.48	4381.7	-4.9422	1534.4	2815.1
1778.5	-24.79	621.34	4426.6	76.67	1543	2830.9
1777.5	24.16	513.18	4457	82.188	1564.7	2859.9
1776.5	18.025	683.02	4496.2	182.1	1520.9	2887.7
1775.6	43.351	608.97	4485.9	85.357	1474.4	2823.6
1774.6	-7.3452	629.31	4462.5	6.9981	1530.2	2801.7
1773.6	-5.6112	626.04	4431.9	127.83	1557.1	2854
1772.7	-9.1176	614.92	4376.7	67.836	1510.7	2834.5
1771.7	26.669	585.45	4376	120.5	1500.9	2753.9
1770.7	17.917	592.66	4372.7	183.62	1546.2	2780.7
1769.7	30.116	445.38	4365	131.51	1586.2	2796.9
1768.8	23.984	525.9	4343.1	137	1560.7	2821.7
1767.8	2.1495	569.75	4376.7	171.3	1519.6	2846.6
1766.8	-48.463	542.92	4370.2	45.941	1452.2	2807.2
1765.8	-2.2507	625.99	4341.4	77.618	1539.3	2797.6
1764.9	33.48	533.75	4276.5	28.193	1558.3	2814.5
1763.9	-6.6501	567.08	4288.7	-18.601	1517.2	2799.2
1762.9	23.835	736.36	4255.9	104.59	1640.8	2777
1761.9	30.78	581.4	4275	97.018	1542.2	2776.6
1761	-11.94	659.12	4291.1	-7.2604	1506.3	2848.9
1760	13.299	577.4	4330.5	87.105	1517.4	2819.2
1759	33.304	579.32	4360.8	11.613	1559.9	2784.7
1758	50.686	523.76	4356.4	134.67	1534.5	2748
1757.1	2.7712	564.85	4365.9	176.73	1644.9	2760.8
1756.1	4.4847	629.41	4378.1	-37.132	1564.6	2775.1
1755.1	-14.687	665.24	4379.9	119.81	1565.3	2800.2
1754.1	-7.7508	604.47	4408.6	7.8425	1513.8	2823
1753.1	1.7911	676.81	4428.1	167.32	1491	2890.4
1752.2	6.1107	644.75	4479.7	104.96	1470.8	2993.3
1751.2	-31.308	680.52	4471.2	123.49	1573.3	3031
1750.2	-0.90457	674.55	4485.2	53.347	1534.8	2993.7
1749.2	-9.6256	710.3	4498.1	43.203	1600.7	2987.5
1748.3	31.188	537.47	4541.7	69.558	1585.7	3002.1
1747.3	43.313	711.36	4558.9	48.988	1552.5	2965.1
1746.3	47.616	517.74	4526.4	33.64	1540.1	2942.1
1745.3	15.442	509.18	4524.9	190.25	1527.8	2987.1
1744.3	-24.535	742.87	4543.9	91.531	1572.7	3000.3
1743.4	31.864	812.39	4494.7	89.205	1576	3046.6
1742.4	2.3139	762.1	4484.7	86.881	1558.4	3047.8
1741.4	30.048	607.7	4454.4	-16.968	1566.9	2974.6
1740.4	8.3175	554.87	4416.1	30.187	1575.4	2962.6
1739.4	-31.621	551.49	4405.8	131.97	1589	2912.5
1738.5	22.119	787.47	4375.9	46.388	1618.3	2850.9
1737.5	16.009	682.59	4409.3	106.51	1598.1	2778.4
1736.5	33.308	699.99	4424.8	33.97	1523.4	2790.5
1735.5	21.997	602.96	4452.6	-22.935	1498	2850.5
1734.5	21.088	750.34	4457.6	99.555	1524.7	2861.9
1733.6	-8.4109	676.72	4476.6	89.442	1595.5	2902.9
1732.6	-22.306	704.49	4490.4	68.945	1559.8	2885
1731.6	-12.814	721.84	4515.4	113.41	1602	2858.7
1730.6	43.429	671.64	4529.8	72.127	1501.3	2876.9
1729.6	29.531	730.54	4577.5	160.72	1652.6	2821.6
1728.7	93.532	641.41	4592.6	103.87	1606.5	2831.4
1727.7	4.3441	718.46	4637.2	106.76	1503.3	2892.1
1726.7	50.156	766.92	4648.1	78.5	1550.6	2907.8
1725.7	18.101	701.18	4667.9	200.76	1603.2	2937.4
1724.7	6.8139	684.76	4646.5	99.853	1554.5	2918.4
1723.7	18.876	593.11	4598.4	110.52	1570.7	2941.7
1722.8	49.086	734.9	4595.9	196.4	1612.8	2999.9
1721.8	11.869	767.74	4628.4	157.78	1610.8	2999.9
1720.8	23.922	759.08	4604.3	158.07	1629.6	2964.1
1719.8	61.888	799.66	4598.5	155.76	1601.7	2958.7
1718.8	22.098	759.89	4594.7	75.716	1607.5	3016.8
1717.8	-2.1294	961.09	4640.5	125.25	1610.7	3024
1716.9	-21.168	869.5	4639.5	110.01	1600.9	3005
1715.9	-9.1227	731.32	4658.3	97.355	1658.5	3056.5
1714.9	28.81	733.01	4674.4	48.467	1651.4	3097.4
1713.9	30.486	760.59	4689.3	180.8	1654.5	3119.8
1712.9	26.984	878.74	4710.5	103.45	1652.6	3198.7
1711.9	31.246	890.75	4773	171.04	1611.7	3179.8
1710.9	9.6353	765.63	4811.8	225.66	1550.2	3090.9
1710	44.938	891.45	4847	101.79	1682.8	3068
1709	41.436	800	4824.5	146.06	1667.8	3068.4
1708	81.889	933.52	4826.3	107.58	1689.1	3048.4
1707	37.019	973.92	4849.7	185.45	1669	3055.5
1706	46.441	882.49	4812.1	38.426	1767.8	3022.9
1705	14.516	935.81	4781.5	-18.091	1665	2999.3
1704	44.607	947.76	4757	194.1	1644.9	2986.8
1703.1	69.52	1068.2	4758.8	153.07	1717.8	2987.5
1702.1	47.939	1167.9	4774.5	248.93	1615.1	2983.8
1701.1	57.349	1001.6	4719.5	225.99	1752.5	2956.8
1700.1	48.686	1049.7	4732.9	138.52	1673	2943.8
1699.1	63.253	1040.9	4734.9	56.245	1763.9	3023.1
1698.1	8.1451	1328.9	4760.4	152.05	1658.7	3022
1697.1	43.354	1010.6	4788.6	-25.637	1705.7	3031.3
1696.1	-6.5691	1097.3	4806.1	-2.0667	1719.1	2959.5
1695.1	59.574	1080.8	4816.9	111.75	1784.2	2946.2
1694.2	4.5109	1110.7	4827.5	8.9537	1854.3	2998.4
1693.2	21.647	1367.4	4878.6	19.618	1759.5	2970.6
1692.2	74.858	1281.3	4925.8	-31.578	1878.6	3042.8
1691.2	-3.366	1357.5	4943.3	84.741	1928	3107.9
1690.2	-12.001	1361.6	4942.4	103.12	1869.3	3137.3
1689.2	36.034	1262.6	4929.8	31.34	1859.5	3247.6
1688.2	53.146	1529.4	4940.1	106.38	1834.3	3271.7
1687.2	70.252	1448.4	4952	189.11	1809	3356.9
1686.2	15.274	1496.2	4934.8	32.414	1837.9	3296.4
1685.2	9.2179	1528.6	4955.3	156.31	1843.5	3221.2
1684.3	41.761	1535.2	4963.6	233.84	1980.4	3236.6
1683.3	51.138	1611.2	4985.9	128.69	1934.6	3179.9
1682.3	42.505	1527.7	5001.4	129.04	1937.7	3196.3
1681.3	64.736	1452	4999	263.11	2041	3237.8
1680.3	53.534	1584.6	5027.4	88.602	2046.6	3216.7
1679.3	32.055	1655.4	5046.2	158.37	2011.1	3232.3
1678.3	23.434	1728.8	5095.7	120.17	2034.7	3197.4
1677.3	-0.60056	1784.1	5134	174.48	1911.8	3192.1
1676.3	47.306	1729	5122.8	92.629	2130.7	3133
1675.3	74.646	1833.1	5143.4	108.41	2100.3	3141.5
1674.3	4.3935	1875.5	5147.1	137.02	1980.1	3161.4
1673.3	21.462	1894.8	5200.3	127.11	2147.4	3215.9
1672.3	115.53	1783.2	5230.8	83.845	2027.2	3273.4
1671.4	86.375	1892.4	5260.5	45.729	2063.6	3363.9
1670.4	85.455	1880.9	5258.8	112.83	2048.6	3345.7
1669.4	66.579	1923.3	5305.2	256.86	2110.7	3374.8
1668.4	73.358	1865.6	5308.8	226.43	1990.6	3330.2
1667.4	44.236	2002.9	5320.2	160.12	2073.1	3339.2
1666.4	40.762	1981.1	5307.6	147.67	2186.3	3338.7
1665.4	73.177	2054.2	5304.1	224.95	2127.8	3319.3
1664.4	54.323	1973.5	5304.8	150.99	2130.8	3232.8
1663.4	79.035	2197.7	5315.8	228.24	2118.4	3251.2
1662.4	65.311	1988.9	5275.3	90.273	2154.7	3259.6
1661.4	107.94	2077.2	5273.1	85.55	2050.1	3305.4
1660.4	53.245	2083.6	5239.9	196.06	2145.3	3300.2
1659.4	83.059	2008.1	5272	168.28	2191.8	3370.2
1658.4	25.833	2196.3	5280.5	166.11	2169.2	3372.1
1657.4	150.33	2248.7	5297.7	112.76	2259.2	3414.7
1656.4	75.202	2088.7	5326.3	141.3	2231.4	3439.3
1655.4	112.66	2210.2	5326.9	241.47	2242	3421.9
1654.4	70.822	2081	5313.3	190.7	2278.2	3390
1653.4	108.27	2159	5371.6	157.85	2255.6	3439.6
1652.4	127.81	2295.8	5383.8	240.07	2281.6	3517.5
1651.4	62.985	2302.1	5386.3	268.57	2302.4	3540.9
1650.4	177.08	2121.9	5407.1	67.074	2330.9	3554.1
1649.4	109.72	2235.6	5441.6	100.72	2333.8	3540.7
1648.4	80.705	2083.5	5440.8	129.24	2326.5	3492.6
1647.4	138.54	2276.3	5448.6	206.29	2291.2	3526.7
1646.4	140.17	2149.9	5407.5	227.12	2304.3	3542.7
1645.4	126.49	2260.9	5422.5	158.6	2363.4	3568.1
1644.5	97.497	2264.7	5472.6	156.47	2246.4	3597.1
1643.5	157.83	2041.3	5506.7	210.48	2353.9	3635.9
1642.5	197.74	2384.5	5493.7	226.21	2318.6	3696.7
1641.5	189.16	2125.5	5487.6	201.12	2347	3677.9
1640.5	78.564	2205.8	5528.6	285.7	2383.1	3617.8
1639.5	197.5	2263.1	5609.9	283.56	2352.8	3579.9
1638.5	194.03	2200.6	5663.7	220.24	2325.1	3511.1
1637.5	137.03	2051.4	5731.1	251.26	2272	3581.3
1636.5	194.73	2144.4	5785.4	106.43	2315.7	3586.9
1635.5	191.26	2117.6	5816.9	272.49	2361.9	3712
1634.4	187.79	2294.6	5844.9	247.45	2318.9	3762.3
1633.4	163.95	2232.1	5900.8	321.73	2403.3	3817.5
1632.4	183.4	2213	5895.4	314.52	2388.4	3884.7
1631.4	192.67	2150.6	5903	241.11	2482.9	3854.8
1630.4	120.48	2164.5	5961.6	345.91	2376.4	3757.6
1629.4	142.48	2119.9	5958.3	178.38	2244.4	3675.7
1628.4	210.26	2304.4	5974.4	201.74	2349.1	3602
1627.4	155.93	2137.7	5983.2	209.83	2298.6	3609
1626.4	200.79	2154.2	5992.8	449.34	2370.1	3586.8
1625.4	176.99	2142.7	6006.8	200.58	2441.7	3663.8
1624.4	257.43	2258.3	6026.4	424.75	2398.8	3716.9
1623.4	170.09	2206.1	6029.5	313.35	2475.4	3790.3
1622.4	159.02	2235.3	6013.2	303.63	2417.3	3852.2
1621.4	122.54	2376.2	6037.5	260.9	2445.5	3903.6
1620.4	218.17	2522.2	6105.4	192.78	2557.6	3937.5
1619.4	222.33	2556.3	6174.8	317.7	2634.1	3961.4
1618.4	267.12	2669.2	6258.5	229.29	2631.9	4045.5
1617.4	238.27	2858.2	6327.2	311	2703.2	4087.5
1616.4	277.96	3146.1	6415.3	143.96	2853.2	4122.7
1615.4	343.01	3289.2	6461.3	317.02	2904.2	4164.3
1614.4	243.13	3536.3	6541	330.17	3142.9	4301.9
1613.4	328.46	3565.1	6626.2	536.1	3148.2	4371.3
1612.4	269.2	3845	6667.6	359.01	3290.4	4389.3
1611.4	374.77	3891.5	6759.2	448.23	3290.5	4462.3
1610.4	356.08	4064.8	6848.9	481.64	3389.6	4515.9
1609.4	329.8	4215.1	6857.2	454.21	3410	4557.7
1608.3	364.35	4058.8	6891.9	462.27	3544.4	4616.5
1607.3	327.95	4097.7	6929.6	401.93	3448.2	4634
1606.3	342.22	4253	6960.8	437.87	3471.1	4585.6
1605.3	391.94	4382.9	6957.9	329.45	3577.6	4571.3
1604.3	393.53	4310.3	6973.6	378.05	3506.8	4604.7
1603.3	357.16	4164.3	7009.3	462.08	3387.9	4578.7
1602.3	333.45	4132.2	6989	480.27	3542.4	4468.8
1601.3	388.2	4295	6976.3	374.48	3426.1	4476.2
1600.3	384.74	4235	7000.8	547.01	3325.1	4490.5
1599.3	345.87	4079	7017.7	355.25	3469.4	4527.7
1598.3	415.75	4168.4	7022.5	578.29	3312.7	4555.6
1597.3	333.91	4020	7005.8	523.14	3444.3	4589.8
1596.3	375.97	4041.1	7019.5	339.1	3361	4663.4
1595.2	387.68	4236.5	6998.3	445.76	3462.2	4655.4
1594.2	343.8	3944.2	7079.3	405.84	3485.1	4688.7
1593.2	368.15	3988	7098	408.88	3609	4702.6
1592.2	490.99	4115.2	7152.6	462.44	3505.5	4670.5
1591.2	421.86	4401.4	7216.5	414.98	3667.2	4763.6
1590.2	479	4346.6	7299.2	493.76	3732.9	4800.4
1589.2	432.63	4491.3	7367.8	433.69	3892	4891.5
1588.2	522.55	4792.3	7508	449.36	3884.4	5012.6
1587.2	539.27	5020.1	7621.6	550.81	4174.6	5191.9
1586.2	624.09	5416.8	7798.1	616.91	4459.6	5412
1585.1	610.52	5710	8001.2	541.75	4638.6	5544.4
1584.1	690.25	6177	8234.5	683.47	4799.8	5792.3
1583.1	832.98	6437.1	8529.4	651.19	5008.9	5948.7
1582.1	862.22	6820.6	8810.5	792.85	5598.5	6142.7
1581.1	1012.4	7350.1	9130.2	891.6	5691.4	6396.7
1580.1	1144.9	8040.6	9468.6	879.46	6109.3	6678.2
1579.1	1184.2	8637.7	9788.6	1207.4	6668.1	7021.2
1578.1	1321.6	9436	10124	1180.1	7312.3	7401.6
1577.1	1627.7	10269	10451	1127.6	7671.7	7758.2
1576	1573.7	10865	10769	1495.6	8086.4	8042.6
1575	1781.5	11713	10994	1674.7	8453	8308.3
1574	1880.9	12208	11235	1619.6	8809.4	8462
1573	1930.1	12733	11371	1652.7	8984.6	8476.6
1572	1974.1	13022	11488	1841.7	9303	8433.9
1571	2071	13438	11534	1741.4	9078.1	8350.7
1570	2004.4	13404	11534	1900.1	9019.2	8247.5
1568.9	1912.6	13657	11478	1895.4	8797	8146.3
1567.9	1888.8	13274	11372	1797.6	8657.8	8022.8
1566.9	1814.8	13024	11222	1634.6	8616.6	7896.6
1565.9	1765.8	12825	11079	1614.9	8457.4	7751.7
1564.9	1576.3	12704	10949	1539.9	8145	7619
1563.9	1494.8	12313	10766	1540.2	8013.6	7474.8
1562.9	1513.8	12137	10623	1430.2	7857.1	7375.4
1561.8	1487.5	11963	10456	1322.6	7760.9	7184.6
1560.8	1235.5	11287	10258	1313	7584.4	7099.3
1559.8	1294.6	11271	10090	1258.2	7325.2	6976.9
1558.8	1243.4	10935	9988	1118.2	7209.2	6873.6
1557.8	1187.2	10427	9870.7	1148.8	6935.1	6736.5
1556.8	1171.1	9852.7	9733.7	1179.4	6668.7	6608.7
1555.7	1029.6	9804.8	9570.7	1094.6	6565.3	6485.9
1554.7	980.99	8929.6	9419.6	819.37	6163.7	6356.2
1553.7	899.8	8894.5	9273.7	890.1	6085.6	6191.5
1552.7	843.69	8390.7	9107.9	785.41	5771.9	6076.7
1551.7	767.58	7686.8	8909.9	733.38	5516	5886.6
1550.6	734.07	7328.8	8756.4	879.24	5195.1	5788.9
1549.6	773.2	7013.5	8588.2	732.06	4926.9	5667.8
1548.6	739.71	6668.3	8429.3	790.24	4691.4	5540.7
1547.6	616.12	6378.3	8269.1	608.09	4656.2	5438.6
1546.6	572.66	6045.9	8118.7	573.69	4388.3	5305.1
1545.6	634.32	5616	7922	661.9	4258.1	5260.8
1544.5	505.83	5263.9	7773.3	589.98	4167.9	5164.1
1543.5	572.48	4981.9	7625.5	613.14	4000.3	5052.8
1542.5	554.08	4860.1	7503.2	561.26	3817.8	4950.7
1541.5	500.69	4458.4	7385.3	611.92	3712.8	4775.3
1540.5	404.83	4319.2	7274.2	357.61	3542.9	4639.7
1539.4	438.97	4025.2	7211.2	405.8	3488	4529.6
1538.4	408.13	4186.1	7153.1	359.02	3460.6	4430.8
1537.4	367.3	3754.8	7064	509.62	3208.4	4412.3
1536.4	366.46	3528.5	6981	437.88	3156.1	4361
1535.4	423.06	3434.7	6895.5	403.62	3088.9	4441.6
1534.3	312.36	3243.5	6814.3	406.83	2896.8	4435.7
1533.3	306.55	3169.7	6713.9	340.15	2962	4450.6
1532.3	238.34	3063.6	6656.6	370.83	2882.3	4321.9
1531.3	287.44	2949.9	6580.3	271.76	2892.5	4264.1
1530.2	306.58	3053.4	6602.1	394.75	2735.6	4227.7
1529.2	300.78	2797.7	6581.1	450.35	2793.2	4152.1
1528.2	272.54	2604.4	6553.1	336.37	2636.4	4102.7
1527.2	211.9	2520.9	6539.2	272.31	2636.7	4066.2
1526.2	241.02	2335.2	6504	238.18	2482.4	3974.8
1525.1	240.22	2555.9	6466.9	420.88	2550	4005.3
1524.1	184.62	2318	6464.2	277.12	2542.8	3981.1
1523.1	221.2	2284.4	6452.3	402.45	2578	3949.3
1522.1	262.75	2387.9	6441.4	368.34	2433.9	3920
1521	261.96	2272.2	6422.2	257.06	2551.2	3964.7
1520	193.96	2278.5	6417.8	218.02	2447	3983.1
1519	188.2	2110.6	6404.2	258.65	2419.9	4009.8
1518	224.76	2161.8	6350.3	356.5	2360.5	4017.4
1516.9	206.57	2081	6280.4	222.94	2390.7	3979
1515.9	205.8	2027.7	6231.4	273.5	2403.5	3914.6
1514.9	165.24	2029.1	6156.1	192.24	2301.9	3947.7
1513.9	191.83	2117.6	6150.6	222.91	2394.2	3894.9
1512.8	176.15	2041.9	6159.5	263.51	2297.6	3905.4
1511.8	195.27	2095.5	6129.6	202.2	2347.7	3901.3
1510.8	189.54	2134.2	6110.7	262.67	2405.2	3929.8
1509.8	198.73	1899.6	6126.2	303.25	2383.2	4011
1508.7	185.55	1908.6	6112.6	289.17	2395.9	4074
1507.7	234.47	2086.3	6124.3	339.67	2431.1	4104.9
1506.7	208.88	2226.8	6157.1	266.01	2364.4	4095.4
1505.6	170.89	2002.3	6137.6	247	2439.2	4098.5
1504.6	214.82	2033.6	6187.4	394.28	2379.9	4092.9
1503.6	201.66	2114.4	6211.9	169.3	2449.8	4064.7
1502.6	248.06	2125.8	6236.8	358.72	2363.3	4032.5
1501.5	244.82	2226.4	6277.5	317.39	2462.9	3930.5
1500.5	239.11	2121.2	6263.3	325.68	2530.1	3924.8
1499.5	260.68	2345.8	6322.3	249.68	2478.4	3909.5
1498.5	247.54	2439	6336.5	317.48	2416.8	3944.4
1497.4	219.53	2450.3	6346.7	174.6	2617.8	3981.2
1496.4	322.86	2476.4	6403.7	212.66	2499.2	4100.4
[truncated: 1,192 more rows]

## Sheet: FTIR
Wavenumber	GdBTC	LC@GdBTC	TbBTC	LC@TbBTC	Wavenumber	BSA@TbBTC	BSA@GdBTC
600.24	74.388	75.174	74.408	71.969	599.87	9.658	22.565
600.72	74.224	75.082	74.405	71.763	600.84	9.456	22.731
601.2	74.129	75.011	74.387	71.564	601.8	9.477	22.533
601.68	74.106	74.96	74.417	71.448	602.77	9.454	22.614
602.16	74.126	74.93	74.527	71.447	603.73	9.132	22.565
602.65	74.147	74.931	74.696	71.539	604.69	9.06	22.463
603.13	74.139	74.965	74.864	71.67	605.66	8.808	22.561
603.61	74.093	75.024	74.967	71.787	606.62	9.13	22.533
604.09	74.019	75.083	74.978	71.867	607.59	8.691	22.144
604.57	73.934	75.104	74.919	71.919	608.55	8.672	22.509
605.06	73.851	75.054	74.846	71.97	609.52	8.758	22.395
605.54	73.771	74.926	74.809	72.039	610.48	9.187	22.243
606.02	73.697	74.747	74.823	72.115	611.45	9.467	22.282
606.5	73.637	74.573	74.864	72.165	612.41	9.442	22.732
606.98	73.61	74.453	74.893	72.157	613.37	8.951	23.254
607.47	73.636	74.412	74.876	72.077	614.34	9.182	23.51
607.95	73.719	74.433	74.799	71.947	615.3	9.037	23.419
608.43	73.85	74.48	74.676	71.815	616.27	9.072	23.186
608.91	73.998	74.518	74.537	71.734	617.23	9.231	22.827
609.4	74.13	74.541	74.422	71.737	618.2	9.152	22.996
609.88	74.211	74.564	74.366	71.829	619.16	8.577	22.719
610.36	74.221	74.606	74.387	71.984	620.12	8.46	22.781
610.84	74.16	74.665	74.476	72.158	621.09	8.508	22.597
611.32	74.054	74.719	74.602	72.302	622.05	8.722	22.531
611.81	73.953	74.736	74.726	72.384	623.02	8.297	22.543
612.29	73.912	74.703	74.821	72.395	623.98	8.151	22.445
612.77	73.968	74.631	74.886	72.355	624.95	7.756	21.905
613.25	74.113	74.549	74.937	72.294	625.91	7.774	21.947
613.73	74.293	74.487	74.986	72.243	626.88	7.902	22.081
614.22	74.436	74.464	75.029	72.217	627.84	8.017	22.106
614.7	74.483	74.48	75.05	72.21	628.8	7.619	21.935
615.18	74.419	74.526	75.032	72.209	629.77	7.463	22.046
615.66	74.271	74.588	74.977	72.201	630.73	7.546	22.071
616.15	74.09	74.649	74.908	72.18	631.7	7.635	21.996
616.63	73.924	74.69	74.857	72.152	632.66	7.585	21.942
617.11	73.803	74.691	74.837	72.121	633.63	7.625	22.106
617.59	73.748	74.645	74.843	72.093	634.59	7.5	21.966
618.07	73.774	74.56	74.857	72.071	635.56	7.518	21.735
618.56	73.886	74.465	74.875	72.059	636.52	7.535	21.704
619.04	74.072	74.395	74.906	72.062	637.48	7.653	22.084
619.52	74.291	74.377	74.969	72.084	638.45	7.704	22.239
620	74.484	74.418	75.064	72.119	639.41	7.785	22.339
620.48	74.586	74.499	75.166	72.156	640.38	7.683	22.329
620.97	74.561	74.581	75.235	72.185	641.34	7.932	22.412
621.45	74.414	74.619	75.24	72.203	642.31	8.007	22.375
621.93	74.197	74.585	75.191	72.222	643.27	8.087	22.46
622.41	73.975	74.476	75.136	72.261	644.24	8.151	22.622
622.89	73.799	74.318	75.138	72.34	645.2	8.364	22.87
623.38	73.688	74.143	75.238	72.469	646.16	8.586	23.025
623.86	73.627	73.976	75.427	72.639	647.13	8.864	23.194
624.34	73.585	73.825	75.646	72.825	648.09	9.039	23.336
624.82	73.531	73.69	75.814	72.989	649.06	9.172	23.495
625.31	73.456	73.577	75.876	73.096	650.02	9.32	23.574
625.79	73.372	73.508	75.833	73.125	650.99	9.592	23.783
626.27	73.307	73.505	75.737	73.08	651.95	9.727	23.924
626.75	73.282	73.573	75.651	72.991	652.92	9.814	23.986
627.23	73.293	73.688	75.609	72.898	653.88	9.981	24.156
627.72	73.313	73.801	75.606	72.842	654.84	10.169	24.328
628.2	73.31	73.861	75.614	72.847	655.81	10.171	24.252
628.68	73.27	73.851	75.609	72.912	656.77	10.353	24.3
629.16	73.213	73.794	75.592	73.01	657.74	10.562	24.467
629.64	73.186	73.745	75.577	73.1	658.7	10.763	24.732
630.13	73.228	73.756	75.581	73.146	659.67	10.852	24.717
630.61	73.35	73.842	75.606	73.141	660.63	11.053	24.558
631.09	73.52	73.975	75.639	73.111	661.6	11.087	24.56
631.57	73.681	74.095	75.666	73.097	662.56	11.065	24.759
632.06	73.78	74.146	75.678	73.133	663.52	11.008	24.851
632.54	73.791	74.104	75.673	73.215	664.49	11.058	24.858
633.02	73.725	73.981	75.648	73.305	665.45	11.194	24.958
633.5	73.615	73.82	75.599	73.349	666.42	11.372	25.205
633.98	73.503	73.665	75.528	73.317	667.38	11.325	25.249
634.47	73.421	73.551	75.454	73.224	668.35	11.051	24.474
634.95	73.385	73.493	75.413	73.129	669.31	11.381	24.921
635.43	73.386	73.489	75.437	73.095	670.28	11.657	25.333
635.91	73.399	73.526	75.529	73.146	671.24	11.891	25.467
636.39	73.385	73.585	75.653	73.246	672.2	12.273	25.728
636.88	73.324	73.647	75.745	73.317	673.17	12.466	25.947
637.36	73.22	73.695	75.76	73.293	674.13	12.688	26.042
637.84	73.108	73.718	75.697	73.159	675.1	12.825	26.151
638.32	73.027	73.715	75.605	72.965	676.06	12.96	26.335
638.8	72.997	73.694	75.554	72.799	677.03	13.135	26.339
639.29	73	73.669	75.593	72.741	677.99	13.221	26.365
639.77	72.988	73.655	75.719	72.823	678.95	13.167	26.411
640.25	72.92	73.656	75.879	73.015	679.92	13.293	26.606
640.73	72.787	73.67	75.999	73.246	680.88	13.438	26.707
641.22	72.628	73.69	76.029	73.447	681.85	13.493	26.65
641.7	72.503	73.715	75.962	73.578	682.81	13.474	26.649
642.18	72.467	73.748	75.839	73.639	683.78	13.526	26.783
642.66	72.536	73.791	75.721	73.66	684.74	13.57	26.83
643.14	72.689	73.843	75.659	73.684	685.71	13.647	26.84
643.63	72.875	73.89	75.679	73.744	686.67	13.58	26.806
644.11	73.044	73.919	75.772	73.852	687.63	13.515	26.798
644.59	73.162	73.93	75.911	73.982	688.6	13.503	26.763
645.07	73.225	73.942	76.061	74.085	689.56	13.578	26.805
645.55	73.246	73.988	76.197	74.111	690.53	13.592	26.831
646.04	73.249	74.093	76.312	74.037	691.49	13.484	26.833
646.52	73.255	74.254	76.408	73.886	692.46	13.377	26.795
647	73.269	74.438	76.485	73.723	693.42	13.439	26.757
647.48	73.286	74.588	76.533	73.62	694.39	13.478	26.816
647.96	73.295	74.66	76.53	73.615	695.35	13.433	26.89
648.45	73.288	74.644	76.459	73.688	696.31	13.304	26.87
648.93	73.265	74.572	76.322	73.772	697.28	13.238	26.868
649.41	73.238	74.499	76.146	73.798	698.24	13.245	26.919
649.89	73.217	74.473	75.978	73.746	699.21	13.282	26.971
650.38	73.209	74.507	75.856	73.655	700.17	13.28	26.924
650.86	73.208	74.583	75.794	73.591	701.14	13.277	26.918
651.34	73.205	74.664	75.787	73.602	702.1	13.306	26.999
651.82	73.195	74.716	75.814	73.684	703.07	13.431	27.074
652.3	73.177	74.729	75.86	73.787	704.03	13.455	27.067
652.79	73.158	74.711	75.924	73.842	704.99	13.495	27.24
653.27	73.144	74.682	76.006	73.804	705.96	13.591	27.449
653.75	73.136	74.657	76.099	73.674	706.92	13.814	27.637
654.23	73.128	74.641	76.182	73.495	707.89	14.041	27.795
654.71	73.114	74.631	76.223	73.327	708.85	14.332	28.129
655.2	73.1	74.635	76.201	73.222	709.82	14.772	28.511
655.68	73.102	74.672	76.121	73.208	710.78	15.284	28.787
656.16	73.143	74.768	76.013	73.281	711.75	15.714	29.083
656.64	73.237	74.937	75.921	73.414	712.71	16.249	29.604
657.13	73.376	75.168	75.877	73.563	713.67	16.887	30.167
657.61	73.526	75.417	75.89	73.684	714.64	17.559	30.673
658.09	73.64	75.624	75.943	73.75	715.6	18.207	31.202
658.57	73.679	75.736	76.007	73.755	716.57	18.829	31.824
659.05	73.631	75.738	76.053	73.715	717.53	19.521	32.359
659.54	73.527	75.66	76.069	73.651	718.5	20.219	32.889
660.02	73.42	75.56	76.061	73.581	719.46	20.846	33.501
660.5	73.36	75.496	76.042	73.508	720.43	21.539	34.119
660.98	73.366	75.496	76.024	73.428	721.39	22.161	34.584
661.46	73.416	75.545	76.006	73.343	722.35	22.739	35.081
661.95	73.461	75.598	75.982	73.269	723.32	23.207	35.524
662.43	73.452	75.608	75.94	73.23	724.28	23.715	35.857
662.91	73.379	75.554	75.877	73.242	725.25	24.156	36.091
663.39	73.274	75.455	75.797	73.296	726.21	24.48	36.28
663.87	73.199	75.362	75.709	73.357	727.18	24.743	36.513
664.36	73.201	75.325	75.621	73.384	728.14	25.045	36.753
664.84	73.28	75.363	75.527	73.349	729.1	25.243	36.929
665.32	73.393	75.458	75.418	73.257	730.07	25.424	37.136
665.8	73.479	75.574	75.284	73.131	731.03	25.616	37.301
666.29	73.48	75.682	75.119	73.004	732	25.807	37.435
666.77	73.34	75.773	74.93	72.918	732.96	25.931	37.48
667.25	73.009	75.866	74.747	72.942	733.93	26.03	37.604
667.73	72.529	76.007	74.668	73.16	734.89	26.067	37.665
668.21	72.232	76.195	74.804	73.506	735.86	26.142	37.627
668.7	72.395	76.301	75.02	73.663	736.82	26.175	37.578
669.18	72.737	76.274	75.106	73.567	737.78	26.255	37.656
669.66	72.99	76.187	75.081	73.387	738.75	26.335	37.792
670.14	73.122	76.101	75.021	73.223	739.71	26.37	37.799
670.62	73.173	76.054	74.975	73.097	740.68	26.325	37.727
671.11	73.176	76.074	74.961	73.014	741.64	26.257	37.773
671.59	73.159	76.171	74.985	72.974	742.61	26.178	37.713
672.07	73.142	76.33	75.038	72.974	743.57	26.098	37.575
672.55	73.137	76.509	75.106	73.001	744.54	25.934	37.443
673.03	73.154	76.653	75.168	73.032	745.5	25.793	37.362
673.52	73.19	76.717	75.208	73.035	746.46	25.56	37.129
674	73.236	76.696	75.209	72.984	747.43	25.299	36.843
674.48	73.278	76.622	75.162	72.871	748.39	24.926	36.559
674.96	73.306	76.552	75.071	72.717	749.36	24.539	36.243
675.45	73.321	76.542	74.956	72.571	750.32	23.947	35.751
675.93	73.335	76.618	74.846	72.485	751.29	23.222	35.202
676.41	73.362	76.766	74.772	72.491	752.25	22.349	34.596
676.89	73.406	76.937	74.747	72.584	753.22	21.308	33.891
677.37	73.455	77.075	74.76	72.726	754.18	20.161	33.003
677.86	73.493	77.14	74.777	72.871	755.14	18.9	32.041
678.34	73.503	77.124	74.757	72.979	756.11	17.484	31.023
678.82	73.481	77.044	74.67	73.03	757.07	16.049	29.987
679.3	73.433	76.93	74.514	73.017	758.04	14.725	29.035
679.78	73.376	76.818	74.316	72.939	759	13.695	28.372
680.27	73.324	76.74	74.126	72.804	759.97	13.122	28.03
680.75	73.287	76.718	73.991	72.633	760.93	13.205	28.053
681.23	73.27	76.765	73.936	72.467	761.9	13.973	28.564
681.71	73.274	76.87	73.949	72.355	762.86	15.477	29.722
682.2	73.292	77.003	73.983	72.329	763.82	17.544	31.354
682.68	73.316	77.119	73.983	72.379	764.79	19.899	33.162
683.16	73.332	77.181	73.912	72.449	765.75	22.39	35.147
683.64	73.323	77.175	73.77	72.467	766.72	24.875	37.189
684.12	73.278	77.111	73.596	72.384	767.68	27.071	38.943
684.61	73.197	77.016	73.446	72.207	768.65	28.915	40.374
685.09	73.092	76.918	73.363	71.992	769.61	30.433	41.613
685.57	72.983	76.836	73.356	71.817	770.58	31.728	42.715
686.05	72.893	76.778	73.397	71.737	771.54	32.711	43.503
686.53	72.832	76.746	73.442	71.762	772.5	33.374	44.016
687.02	72.801	76.746	73.453	71.856	773.47	33.903	44.5
687.5	72.79	76.781	73.41	71.958	774.43	34.426	44.963
687.98	72.79	76.853	73.322	72.016	775.4	34.889	45.291
688.46	72.796	76.954	73.207	72.002	776.36	35.243	45.587
688.94	72.807	77.064	73.081	71.918	777.33	35.476	45.831
689.43	72.816	77.16	72.946	71.788	778.29	35.731	46.054
689.91	72.808	77.216	72.793	71.641	779.25	35.922	46.188
690.39	72.76	77.219	72.614	71.497	780.22	36.014	46.295
690.87	72.659	77.175	72.41	71.367	781.18	36.131	46.439
691.36	72.512	77.104	72.194	71.251	782.15	36.319	46.619
691.84	72.348	77.039	71.982	71.141	783.11	36.421	46.717
692.32	72.205	77.007	71.781	71.025	784.08	36.555	46.817
692.8	72.107	77.019	71.59	70.893	785.04	36.702	46.983
693.28	72.051	77.058	71.395	70.741	786.01	36.872	47.12
693.77	72.004	77.098	71.183	70.573	786.97	37.021	47.148
694.25	71.934	77.119	70.947	70.4	787.93	37.2	47.274
694.73	71.82	77.121	70.688	70.235	788.9	37.414	47.5
695.21	71.67	77.123	70.412	70.081	789.86	37.573	47.636
695.69	71.504	77.142	70.122	69.93	790.83	37.665	47.662
696.18	71.333	77.176	69.818	69.764	791.79	37.845	47.812
696.66	71.148	77.204	69.496	69.565	792.76	37.968	47.936
697.14	70.926	77.193	69.146	69.319	793.72	38.041	47.977
697.62	70.651	77.133	68.751	69.024	794.69	38.084	47.964
698.1	70.331	77.04	68.289	68.682	795.65	38.127	47.98
698.59	70	76.956	67.73	68.299	796.61	38.136	47.998
699.07	69.7	76.916	67.051	67.875	797.58	38.069	47.908
699.55	69.457	76.93	66.24	67.409	798.54	38.022	47.83
700.03	69.266	76.978	65.301	66.902	799.51	38.018	47.862
700.52	69.095	77.029	64.254	66.36	800.47	37.973	47.837
701	68.907	77.059	63.123	65.798	801.44	37.972	47.794
701.48	68.673	77.068	61.928	65.233	802.4	37.978	47.789
701.96	68.385	77.077	60.68	64.677	803.37	37.958	47.812
702.44	68.054	77.107	59.389	64.137	804.33	37.904	47.765
702.93	67.696	77.167	58.065	63.611	805.29	37.788	47.674
703.41	67.322	77.246	56.728	63.099	806.26	37.628	47.539
703.89	66.936	77.32	55.407	62.603	807.22	37.611	47.532
704.37	66.546	77.367	54.143	62.127	808.19	37.649	47.572
704.85	66.162	77.379	52.977	61.677	809.15	37.743	47.642
705.34	65.803	77.366	51.952	61.26	810.12	37.939	47.765
705.82	65.49	77.352	51.102	60.886	811.08	38.169	47.953
706.3	65.241	77.364	50.451	60.574	812.05	38.341	48.076
706.78	65.066	77.422	50.004	60.351	813.01	38.492	48.177
707.27	64.967	77.531	49.747	60.238	813.97	38.561	48.262
707.75	64.942	77.682	49.657	60.24	814.94	38.643	48.346
708.23	64.979	77.853	49.705	60.338	815.9	38.674	48.335
708.71	65.064	78.021	49.873	60.497	816.87	38.667	48.299
709.19	65.176	78.167	50.158	60.681	817.83	38.622	48.259
709.68	65.294	78.284	50.576	60.877	818.8	38.601	48.224
710.16	65.402	78.378	51.143	61.094	819.76	38.582	48.148
710.64	65.491	78.464	51.86	61.353	820.73	38.542	48.154
711.12	65.564	78.558	52.695	61.668	821.69	38.437	48.137
711.6	65.63	78.674	53.588	62.027	822.65	38.426	48.11
712.09	65.701	78.819	54.469	62.399	823.62	38.545	48.2
712.57	65.796	78.988	55.289	62.753	824.58	38.77	48.421
713.05	65.931	79.172	56.039	63.07	825.55	38.976	48.602
713.53	66.116	79.353	56.743	63.356	826.51	39.158	48.724
714.01	66.346	79.512	57.439	63.62	827.48	39.253	48.734
714.5	66.601	79.635	58.154	63.873	828.44	39.311	48.774
714.98	66.849	79.719	58.887	64.114	829.41	39.363	48.845
715.46	67.073	79.778	59.628	64.347	830.37	39.451	48.925
715.94	67.28	79.843	60.37	64.591	831.33	39.539	48.974
716.43	67.504	79.954	61.122	64.875	832.3	39.59	49.028
716.91	67.785	80.14	61.901	65.226	833.26	39.618	49.051
717.39	68.142	80.405	62.716	65.637	834.23	39.705	49.09
717.87	68.553	80.72	63.548	66.07	835.19	39.73	49.128
718.35	68.962	81.039	64.353	66.463	836.16	39.744	49.146
718.84	69.299	81.318	65.081	66.763	837.12	39.723	49.138
719.32	69.519	81.537	65.688	66.955	838.08	39.78	49.195
719.8	69.62	81.709	66.162	67.062	839.05	39.805	49.277
720.28	69.641	81.869	66.515	67.137	840.01	39.814	49.307
720.76	69.646	82.055	66.784	67.227	840.98	39.834	49.284
721.25	69.687	82.281	66.997	67.348	841.94	39.878	49.304
721.73	69.787	82.534	67.165	67.482	842.91	39.925	49.364
722.21	69.936	82.788	67.277	67.591	843.87	39.957	49.411
722.69	70.109	83.017	67.317	67.65	844.84	39.993	49.398
723.18	70.278	83.208	67.284	67.655	845.8	40.024	49.438
723.66	70.423	83.365	67.195	67.626	846.76	40.022	49.451
724.14	70.531	83.505	67.083	67.59	847.73	40.033	49.452
724.62	70.599	83.644	66.976	67.571	848.69	40.073	49.464
725.1	70.627	83.791	66.886	67.575	849.66	40.118	49.512
725.59	70.62	83.936	66.81	67.595	850.62	40.126	49.565
726.07	70.585	84.061	66.746	67.622	851.59	40.189	49.619
726.55	70.532	84.147	66.703	67.65	852.55	40.253	49.646
727.03	70.477	84.187	66.705	67.686	853.52	40.259	49.65
727.51	70.438	84.195	66.771	67.739	854.48	40.289	49.68
728	70.427	84.196	66.899	67.818	855.44	40.382	49.738
728.48	70.451	84.219	67.061	67.923	856.41	40.4	49.772
728.96	70.505	84.277	67.218	68.049	857.37	40.405	49.812
729.44	70.575	84.367	67.342	68.19	858.34	40.453	49.866
729.92	70.646	84.473	67.433	68.342	859.3	40.567	49.986
730.41	70.703	84.576	67.515	68.506	860.27	40.654	50.041
730.89	70.739	84.669	67.621	68.681	861.23	40.673	50.053
731.37	70.75	84.756	67.768	68.867	862.2	40.678	50.067
731.85	70.738	84.841	67.954	69.061	863.16	40.734	50.103
732.34	70.705	84.928	68.163	69.255	864.12	40.753	50.133
732.82	70.659	85.012	68.379	69.445	865.09	40.816	50.191
733.3	70.608	85.084	68.593	69.624	866.05	40.878	50.253
733.78	70.568	85.14	68.805	69.787	867.02	40.95	50.27
734.26	70.547	85.186	69.013	69.928	867.98	40.978	50.276
734.75	70.549	85.231	69.211	70.047	868.95	41.039	50.331
735.23	70.566	85.282	69.391	70.15	869.91	41.095	50.361
735.71	70.583	85.339	69.547	70.249	870.88	41.157	50.437
736.19	70.588	85.397	69.679	70.358	871.84	41.199	50.488
736.67	70.578	85.447	69.785	70.488	872.8	41.228	50.507
737.16	70.564	85.488	69.869	70.643	873.77	41.28	50.511
737.64	70.566	85.524	69.939	70.818	874.73	41.371	50.566
738.12	70.598	85.558	70.014	71.008	875.7	41.439	50.656
738.6	70.665	85.589	70.123	71.21	876.66	41.492	50.723
739.09	70.763	85.609	70.291	71.423	877.63	41.524	50.745
739.57	70.886	85.609	70.521	71.648	878.59	41.572	50.761
740.05	71.032	85.583	70.791	71.883	879.56	41.644	50.813
740.53	71.205	85.539	71.056	72.124	880.52	41.679	50.867
741.01	71.415	85.491	71.27	72.36	881.48	41.664	50.858
741.5	71.663	85.456	71.417	72.583	882.45	41.703	50.894
741.98	71.948	85.446	71.515	72.792	883.41	41.783	50.954
742.46	72.264	85.459	71.611	72.995	884.38	41.818	50.964
742.94	72.601	85.486	71.752	73.206	885.34	41.83	50.96
743.42	72.952	85.511	71.963	73.441	886.31	41.9	51.012
743.91	73.305	85.517	72.232	73.702	887.27	41.955	51.031
744.39	73.649	85.495	72.517	73.978	888.23	42.024	51.039
744.87	73.977	85.444	72.76	74.243	889.2	42.063	51.062
745.35	74.285	85.37	72.918	74.469	890.16	42.075	51.123
745.83	74.573	85.282	72.975	74.64	891.13	42.115	51.178
746.32	74.841	85.187	72.944	74.753	892.09	42.177	51.212
746.8	75.079	85.083	72.862	74.821	893.06	42.165	51.205
747.28	75.27	84.969	72.761	74.859	894.02	42.173	51.229
747.76	75.399	84.843	72.661	74.873	894.99	42.259	51.235
748.25	75.463	84.71	72.556	74.865	895.95	42.301	51.236
748.73	75.48	84.582	72.42	74.83	896.91	42.301	51.284
749.21	75.473	84.472	72.218	74.768	897.88	42.352	51.319
749.69	75.456	84.383	71.921	74.682	898.84	42.397	51.311
750.17	75.417	84.307	71.508	74.57	899.81	42.431	51.329
750.66	75.321	84.227	70.971	74.421	900.77	42.493	51.372
751.14	75.132	84.121	70.31	74.213	901.74	42.518	51.395
751.62	74.83	83.972	69.532	73.923	902.7	42.52	51.377
752.1	74.425	83.764	68.644	73.542	903.67	42.537	51.402
752.58	73.949	83.486	67.654	73.074	904.63	42.556	51.427
753.07	73.43	83.138	66.568	72.537	905.59	42.583	51.428
753.55	72.881	82.73	65.391	71.952	906.56	42.588	51.421
754.03	72.292	82.287	64.129	71.334	907.52	42.595	51.432
754.51	71.644	81.835	62.787	70.691	908.49	42.604	51.437
754.99	70.924	81.391	61.379	70.028	909.45	42.622	51.433
755.48	70.132	80.952	59.924	69.357	910.42	42.616	51.397
755.96	69.28	80.503	58.461	68.698	911.38	42.627	51.414
756.44	68.389	80.025	57.044	68.072	912.35	42.616	51.436
756.92	67.475	79.516	55.744	67.496	913.31	42.652	51.421
757.41	66.557	78.998	54.627	66.974	914.27	42.677	51.401
757.89	65.657	78.515	53.743	66.501	915.24	42.66	51.405
758.37	64.81	78.11	53.11	66.062	916.2	42.632	51.379
758.85	64.055	77.814	52.717	65.649	917.17	42.626	51.325
759.33	63.432	77.637	52.541	65.266	918.13	42.596	51.253
759.82	62.966	77.568	52.562	64.928	919.1	42.592	51.235
760.3	62.661	77.592	52.775	64.662	920.06	42.584	51.236
760.78	62.51	77.697	53.177	64.49	921.03	42.557	51.184
761.26	62.502	77.884	53.766	64.427	921.99	42.509	51.117
761.74	62.639	78.165	54.521	64.475	922.95	42.474	51.114
762.23	62.939	78.56	55.411	64.627	923.92	42.416	51.052
762.71	63.424	79.077	56.403	64.876	924.88	42.378	50.941
763.19	64.099	79.716	57.471	65.216	925.85	42.331	50.856
763.67	64.946	80.454	58.594	65.642	926.81	42.269	50.807
764.16	65.913	81.253	59.756	66.149	927.78	42.157	50.713
764.64	66.939	82.074	60.939	66.724	928.74	42.045	50.598
765.12	67.973	82.883	62.12	67.348	929.71	41.919	50.486
765.6	68.991	83.661	63.279	68.001	930.67	41.764	50.363
766.08	69.996	84.403	64.403	68.671	931.63	41.59	50.185
766.57	71.006	85.107	65.486	69.349	932.6	41.389	50.001
767.05	72.028	85.771	66.53	70.038	933.56	41.191	49.96
767.53	73.052	86.39	67.541	70.745	934.53	41.225	50.124
768.01	74.05	86.955	68.528	71.472	935.49	41.541	50.406
768.49	74.995	87.462	69.502	72.22	936.46	41.889	50.657
768.98	75.87	87.906	70.471	72.979	937.42	42.08	50.779
769.46	76.677	88.286	71.437	73.736	938.39	42.245	50.882
769.94	77.432	88.603	72.383	74.476	939.35	42.348	50.976
770.42	78.147	88.859	73.284	75.185	940.31	42.39	51.037
770.9	78.83	89.064	74.112	75.859	941.28	42.395	51.052
771.39	79.484	89.237	74.855	76.498	942.24	42.391	51.078
771.87	80.108	89.401	75.524	77.106	943.21	42.41	51.153
772.35	80.708	89.575	76.145	77.683	944.17	42.567	51.284
772.83	81.293	89.765	76.746	78.226	945.14	42.779	51.415
773.32	81.865	89.962	77.341	78.725	946.1	42.892	51.479
773.8	82.416	90.147	77.923	79.173	947.06	42.932	51.473
774.28	82.929	90.302	78.475	79.575	948.03	42.947	51.471
774.76	83.393	90.42	78.985	79.947	948.99	42.951	51.471
775.24	83.803	90.509	79.457	80.317	949.96	42.936	51.443
775.73	84.174	90.587	79.915	80.714	950.92	42.939	51.444
776.21	84.524	90.672	80.388	81.158	951.89	42.94	51.466
776.69	84.868	90.77	80.894	81.644	952.85	42.933	51.46
777.17	85.205	90.881	81.427	82.145	953.82	42.949	51.463
777.65	85.522	90.99	81.968	82.617	954.78	42.939	51.471
778.14	85.806	91.086	82.484	83.021	955.74	42.917	51.485
778.62	86.057	91.157	82.953	83.341	956.71	42.893	51.46
779.1	86.286	91.202	83.364	83.592	957.67	42.912	51.434
779.58	86.516	91.23	83.722	83.814	958.64	42.902	51.432
780.06	86.763	91.25	84.043	84.051	959.6	42.892	51.438
780.55	87.026	91.276	84.344	84.331	960.57	42.879	51.381
781.03	87.291	91.314	84.637	84.649	961.53	42.885	51.375
781.51	87.535	91.368	84.925	84.973	962.5	42.876	51.391
781.99	87.737	91.431	85.201	85.261	963.46	42.867	51.391
782.48	87.894	91.497	85.455	85.488	964.42	42.85	51.374
782.96	88.016	91.559	85.682	85.652	965.39	42.819	51.359
783.44	88.127	91.616	85.883	85.771	966.35	42.795	51.352
783.92	88.249	91.67	86.068	85.871	967.32	42.796	51.338
784.4	88.401	91.727	86.249	85.969	968.28	42.796	51.32
784.89	88.585	91.793	86.43	86.064	969.25	42.805	51.34
785.37	88.791	91.867	86.608	86.149	970.21	42.838	51.381
785.85	88.999	91.946	86.773	86.224	971.18	42.904	51.412
786.33	89.194	92.02	86.919	86.298	972.14	42.946	51.426
786.81	89.365	92.083	87.044	86.386	973.1	42.981	51.472
787.3	89.513	92.127	87.155	86.497	974.07	43.032	51.536
787.78	89.641	92.153	87.257	86.629	975.03	43.076	51.543
788.26	89.754	92.164	87.356	86.761	976	43.087	51.505
788.74	89.853	92.17	87.454	86.878	976.96	43.074	51.508
789.23	89.935	92.181	87.557	86.972	977.93	43.076	51.509
789.71	90	92.209	87.67	87.051	978.89	43.098	51.508
790.19	90.055	92.258	87.795	87.129	979.86	43.108	51.509
790.67	90.108	92.327	87.923	87.215	980.82	43.148	51.539
791.15	90.169	92.404	88.033	87.302	981.78	43.163	51.564
791.64	90.243	92.476	88.103	87.374	982.75	43.169	51.553
792.12	90.323	92.525	88.121	87.414	983.71	43.154	51.525
792.6	90.397	92.541	88.098	87.418	984.68	43.164	51.548
793.08	90.452	92.521	88.062	87.396	985.64	43.195	51.549
793.56	90.479	92.474	88.043	87.365	986.61	43.213	51.553
794.05	90.482	92.42	88.054	87.343	987.57	43.22	51.566
794.53	90.473	92.385	88.086	87.34	988.54	43.216	51.564
795.01	90.471	92.39	88.116	87.361	989.5	43.206	51.536
795.49	90.489	92.438	88.126	87.4	990.46	43.217	51.511
795.97	90.531	92.517	88.113	87.444	991.43	43.219	51.524
796.46	90.589	92.596	88.09	87.478	992.39	43.217	51.555
796.94	90.653	92.65	88.072	87.488	993.36	43.199	51.512
797.42	90.714	92.665	88.067	87.468	994.32	43.201	51.484
797.9	90.769	92.652	88.07	87.429	995.29	43.2	51.486
798.39	90.814	92.636	88.07	87.392	996.25	43.23	51.5
798.87	90.849	92.641	88.058	87.38	997.21	43.23	51.471
799.35	90.869	92.674	88.029	87.403	998.18	43.213	51.45
799.83	90.871	92.729	87.988	87.449	999.14	43.219	51.459
800.31	90.858	92.79	87.939	87.496	1000.1	43.211	51.431
800.8	90.839	92.841	87.887	87.52	1001.1	43.166	51.351
801.28	90.828	92.877	87.839	87.515	1002	43.133	51.314
801.76	90.834	92.892	87.799	87.487	1003	43.064	51.268
802.24	90.853	92.878	87.771	87.451	1004	43.024	51.211
802.72	90.873	92.824	87.746	87.42	1004.9	43.029	51.181
803.21	90.876	92.73	87.709	87.39	1005.9	43.029	51.21
803.69	90.853	92.611	87.643	87.351	1006.9	43.034	51.224
804.17	90.803	92.502	87.543	87.292	1007.8	43.056	51.197
804.65	90.734	92.441	87.422	87.215	1008.8	43.081	51.18
805.13	90.661	92.446	87.311	87.136	1009.8	43.105	51.205
805.62	90.594	92.505	87.244	87.08	1010.7	43.098	51.189
806.1	90.542	92.58	87.241	87.067	1011.7	43.088	51.15
806.58	90.511	92.633	87.297	87.102	1012.6	43.062	51.128
807.06	90.501	92.646	87.385	87.169	1013.6	43.068	51.149
807.55	90.509	92.627	87.466	87.236	1014.6	43.061	51.104
808.03	90.529	92.607	87.506	87.269	1015.5	43.046	51.046
808.51	90.555	92.612	87.493	87.251	1016.5	43.03	51.03
808.99	90.586	92.65	87.436	87.193	1017.5	43.024	51.035
809.47	90.626	92.708	87.368	87.131	1018.4	42.985	50.991
809.96	90.679	92.762	87.326	87.104	1019.4	42.979	50.97
810.44	90.752	92.796	87.338	87.138	1020.4	42.989	50.976
810.92	90.84	92.808	87.41	87.225	1021.3	42.99	50.97
811.4	90.934	92.812	87.522	87.334	1022.3	42.958	50.917
811.88	91.021	92.824	87.636	87.429	1023.3	42.928	50.871
812.37	91.09	92.858	87.721	87.49	1024.2	42.902	50.845
812.85	91.141	92.913	87.763	87.523	1025.2	42.894	50.825
813.33	91.176	92.981	87.776	87.553	1026.1	42.869	50.778
813.81	91.205	93.051	87.794	87.597	1027.1	42.844	50.752
814.3	91.231	93.112	87.848	87.657	1028.1	42.804	50.74
814.78	91.254	93.159	87.95	87.717	1029	42.762	50.698
815.26	91.269	93.189	88.087	87.76	1030	42.735	50.627
815.74	91.272	93.201	88.228	87.777	1031	42.713	50.604
816.22	91.27	93.2	88.339	87.777	1031.9	42.695	50.601
816.71	91.273	93.189	88.402	87.772	1032.9	42.703	50.59
817.19	91.294	93.176	88.416	87.771	1033.9	42.674	50.552
817.67	91.334	93.164	88.401	87.774	1034.8	42.655	50.547
818.15	91.383	93.151	88.382	87.775	1035.8	42.63	50.522
818.63	91.419	93.129	88.386	87.779	1036.8	42.59	50.466
819.12	91.425	93.09	88.428	87.795	1037.7	42.56	50.398
819.6	91.398	93.039	88.506	87.837	1038.7	42.533	50.378
820.08	91.353	92.989	88.6	87.906	1039.6	42.491	50.353
820.56	91.317	92.96	88.681	87.989	1040.6	42.484	50.328
821.04	91.311	92.962	88.722	88.066	1041.6	42.45	50.287
821.53	91.337	92.992	88.717	88.121	1042.5	42.403	50.238
822.01	91.382	93.03	88.687	88.156	1043.5	42.364	50.213
822.49	91.426	93.055	88.668	88.183	1044.5	42.336	50.18
822.97	91.455	93.061	88.693	88.22	1045.4	42.3	50.14
823.46	91.468	93.057	88.773	88.274	1046.4	42.274	50.129
823.94	91.478	93.065	88.887	88.343	1047.4	42.232	50.089
824.42	91.501	93.098	89	88.415	1048.3	42.199	50.027
824.9	91.544	93.154	89.081	88.481	1049.3	42.165	49.987
825.38	91.607	93.215	89.124	88.536	1050.3	42.139	49.976
825.87	91.678	93.268	89.147	88.583	1051.2	42.1	49.925
826.35	91.748	93.314	89.172	88.626	1052.2	42.07	49.885
826.83	91.809	93.366	89.213	88.665	1053.2	42.042	49.879
827.31	91.857	93.438	89.266	88.701	1054.1	42.042	49.866
827.79	91.898	93.528	89.317	88.734	1055.1	42.021	49.807
828.28	91.935	93.617	89.356	88.765	1056	41.999	49.777
828.76	91.974	93.681	89.383	88.793	1057	41.963	49.761
829.24	92.017	93.708	89.405	88.819	1058	41.948	49.738
829.72	92.065	93.706	89.429	88.845	1058.9	41.903	49.683
830.21	92.118	93.699	89.458	88.877	1059.9	41.858	49.644
830.69	92.174	93.706	89.495	88.924	1060.9	41.816	49.623
831.17	92.232	93.729	89.55	88.997	1061.8	41.797	49.581
831.65	92.289	93.756	89.637	89.097	1062.8	41.784	49.52
832.13	92.343	93.772	89.766	89.213	1063.8	41.772	49.508
832.62	92.389	93.779	89.931	89.324	1064.7	41.724	49.482
833.1	92.422	93.787	90.106	89.411	1065.7	41.688	49.421
833.58	92.438	93.814	90.255	89.462	1066.7	41.646	49.36
834.06	92.438	93.858	90.353	89.484	1067.6	41.599	49.344
834.54	92.43	93.904	90.394	89.493	1068.6	41.571	49.337
835.03	92.424	93.928	90.399	89.51	1069.5	41.564	49.307
835.51	92.435	93.922	90.399	89.545	1070.5	41.504	49.234
835.99	92.471	93.896	90.416	89.6	1071.5	41.466	49.206
836.47	92.532	93.874	90.456	89.671	1072.4	41.435	49.183
836.95	92.608	93.877	90.507	89.753	1073.4	41.383	49.092
837.44	92.682	93.904	90.548	89.838	1074.4	41.328	49.015
837.92	92.736	93.939	90.567	89.92	1075.3	41.289	49.019
838.4	92.762	93.959	90.564	89.989	1076.3	41.237	48.96
838.88	92.764	93.953	90.552	90.04	1077.3	41.192	48.884
839.37	92.756	93.927	90.551	90.071	1078.2	41.14	48.852
839.85	92.755	93.893	90.579	90.089	1079.2	41.097	48.824
840.33	92.771	93.86	90.642	90.106	1080.2	41.052	48.782
840.81	92.805	93.832	90.734	90.132	1081.1	41.011	48.732
841.29	92.853	93.811	90.839	90.172	1082.1	40.968	48.684
841.78	92.905	93.798	90.939	90.224	1083	40.942	48.655
842.26	92.957	93.802	91.019	90.283	1084	40.881	48.598
842.74	93.008	93.826	91.076	90.345	1085	40.824	48.544
843.22	93.06	93.866	91.115	90.407	1085.9	40.755	48.505
843.7	93.115	93.908	91.145	90.464	1086.9	40.706	48.473
844.19	93.174	93.936	91.179	90.509	1087.9	40.649	48.381
844.67	93.238	93.944	91.226	90.539	1088.8	40.596	48.303
845.15	93.306	93.937	91.292	90.556	1089.8	40.526	48.251
845.63	93.379	93.927	91.378	90.571	1090.8	40.43	48.177
846.11	93.452	93.925	91.481	90.6	1091.7	40.318	48.049
846.6	93.522	93.933	91.594	90.66	1092.7	40.219	47.929
847.08	93.585	93.943	91.704	90.754	1093.7	40.077	47.791
847.56	93.643	93.947	91.795	90.876	1094.6	39.909	47.612
848.04	93.705	93.941	91.854	91.008	1095.6	39.678	47.381
848.53	93.778	93.93	91.868	91.125	1096.6	39.448	47.187
849.01	93.865	93.926	91.836	91.203	1097.5	39.175	46.964
849.49	93.954	93.938	91.768	91.228	1098.5	38.836	46.657
849.97	94.03	93.968	91.684	91.2	1099.4	38.445	46.297
850.45	94.073	94.013	91.61	91.132	1100.4	38.001	45.94
850.94	94.08	94.062	91.572	91.052	1101.4	37.471	45.53
851.42	94.061	94.112	91.583	90.986	1102.3	36.915	45.095
851.9	94.037	94.16	91.643	90.954	1103.3	36.327	44.636
852.38	94.031	94.21	91.737	90.957	1104.3	35.782	44.264
852.86	94.048	94.261	91.841	90.988	1105.2	35.396	44.007
853.35	94.082	94.307	91.935	91.036	1106.2	35.277	43.904
853.83	94.117	94.334	92.002	91.092	1107.2	35.363	43.993
854.31	94.134	94.33	92.039	91.156	1108.1	35.516	44.171
854.79	94.128	94.287	92.053	91.223	1109.1	35.543	44.241
855.28	94.104	94.213	92.058	91.285	1110.1	35.475	44.233
855.76	94.082	94.129	92.071	91.329	1111	35.371	44.238
856.24	94.081	94.061	92.103	91.349	1112	35.367	44.323
856.72	94.119	94.031	92.16	91.345	1112.9	35.598	44.533
857.2	94.199	94.05	92.232	91.329	1113.9	36.168	44.977
857.69	94.31	94.11	92.303	91.319	1114.9	36.974	45.572
858.17	94.434	94.194	92.358	91.326	1115.8	37.86	46.238
858.65	94.546	94.281	92.387	91.356	1116.8	38.653	46.822
859.13	94.63	94.359	92.391	91.409	1117.8	39.268	47.294
859.61	94.675	94.424	92.383	91.478	1118.7	39.709	47.677
860.1	94.687	94.48	92.373	91.555	1119.7	40.016	47.968
860.58	94.673	94.529	92.371	91.626	1120.7	40.245	48.149
861.06	94.649	94.571	92.38	91.675	1121.6	40.453	48.294
861.54	94.627	94.6	92.397	91.695	1122.6	40.576	48.411
862.02	94.616	94.614	92.42	91.689	1123.6	40.668	48.493
862.51	94.621	94.617	92.444	91.673	1124.5	40.742	48.521
862.99	94.638	94.618	92.463	91.668	1125.5	40.821	48.576
863.47	94.663	94.627	92.472	91.684	1126.4	40.876	48.654
863.95	94.688	94.646	92.47	91.721	1127.4	40.931	48.695
864.44	94.715	94.666	92.466	91.769	1128.4	40.954	48.703
864.92	94.748	94.678	92.475	91.816	1129.3	41.006	48.751
865.4	94.793	94.677	92.513	91.858	1130.3	41.062	48.791
865.88	94.853	94.669	92.587	91.9	1131.3	41.112	48.816
866.36	94.919	94.669	92.686	91.944	1132.2	41.114	48.811
866.85	94.98	94.69	92.789	91.989	1133.2	41.143	48.843
867.33	95.027	94.739	92.875	92.026	1134.2	41.179	48.866
867.81	95.063	94.808	92.933	92.049	1135.1	41.202	48.853
868.29	95.096	94.887	92.968	92.054	1136.1	41.188	48.834
868.77	95.136	94.964	92.994	92.044	1137.1	41.176	48.85
869.26	95.185	95.031	93.021	92.025	1138	41.171	48.831
869.74	95.233	95.079	93.048	92.008	1139	41.186	48.798
870.22	95.262	95.103	93.066	92.002	1139.9	41.175	48.772
870.7	95.261	95.097	93.067	92.015	1140.9	41.156	48.77
871.18	95.229	95.061	93.05	92.053	1141.9	41.128	48.738
871.67	95.178	95.003	93.024	92.107	1142.8	41.117	48.692
872.15	95.129	94.938	93.002	92.162	1143.8	41.081	48.635
872.63	95.099	94.889	92.994	92.194	1144.8	41.062	48.603
873.11	95.104	94.872	93.006	92.191	1145.7	41.04	48.537
873.6	95.151	94.897	93.035	92.157	1146.7	40.986	48.468
874.08	95.24	94.961	93.076	92.115	1147.7	40.918	48.428
874.56	95.357	95.049	93.123	92.09	1148.6	40.899	48.403
875.04	95.478	95.137	93.166	92.101	1149.6	40.847	48.305
875.52	95.568	95.198	93.203	92.145	1150.6	40.79	48.235
876.01	95.598	95.216	93.234	92.205	1151.5	40.73	48.18
876.49	95.56	95.191	93.263	92.263	1152.5	40.696	48.134
876.97	95.477	95.141	93.297	92.308	1153.5	40.625	48.058
877.45	95.392	95.093	93.338	92.341	1154.4	40.577	48.004
877.93	95.349	95.076	93.383	92.368	1155.4	40.531	47.959
878.42	95.371	95.099	93.418	92.392	1156.3	40.478	47.899
878.9	95.447	95.153	93.433	92.407	1157.3	40.428	47.818
879.38	95.542	95.21	93.419	92.405	1158.3	40.403	47.797
879.86	95.623	95.243	93.386	92.378	1159.2	40.359	47.767
880.35	95.673	95.24	93.349	92.329	1160.2	40.317	47.731
880.83	95.704	95.208	93.326	92.271	1161.2	40.259	47.653
881.31	95.74	95.172	93.328	92.22	1162.1	40.212	47.604
881.79	95.796	95.153	93.348	92.188	1163.1	40.173	47.574
882.27	95.865	95.158	93.372	92.182	1164.1	40.152	47.523
882.76	95.92	95.176	93.385	92.199	1165	40.119	47.486
883.24	95.935	95.19	93.387	92.234	1166	40.114	47.492
883.72	95.9	95.188	93.389	92.276	1167	40.079	47.456
884.2	95.83	95.177	93.41	92.317	1167.9	40.027	47.372
884.68	95.756	95.178	93.457	92.35	1168.9	39.982	47.309
885.17	95.707	95.208	93.522	92.371	1169.8	39.946	47.294
885.65	95.699	95.269	93.585	92.385	1170.8	39.903	47.271
886.13	95.724	95.345	93.624	92.399	1171.8	39.886	47.248
886.61	95.766	95.411	93.634	92.422	1172.7	39.863	47.225
887.09	95.807	95.449	93.628	92.46	1173.7	39.848	47.214
887.58	95.838	95.454	93.628	92.508	1174.7	39.833	47.179
888.06	95.861	95.442	93.651	92.556	1175.6	39.809	47.144
888.54	95.888	95.431	93.698	92.59	1176.6	39.785	47.139
889.02	95.932	95.435	93.751	92.602	1177.6	39.806	47.168
889.51	96	95.46	93.79	92.589	1178.5	39.798	47.143
889.99	96.093	95.502	93.8	92.56	1179.5	39.774	47.099
890.47	96.194	95.552	93.779	92.527	1180.5	39.733	47.074
890.95	96.278	95.597	93.736	92.499	1181.4	39.709	47.048
891.43	96.319	95.626	93.69	92.483	1182.4	39.684	46.987
891.92	96.303	95.624	93.656	92.482	1183.3	39.658	46.948
892.4	96.234	95.588	93.642	92.497	1184.3	39.633	46.921
892.88	96.14	95.525	93.648	92.524	1185.3	39.605	46.897
893.36	96.057	95.457	93.667	92.552	1186.2	39.54	46.835
893.84	96.013	95.409	93.687	92.568	1187.2	39.505	46.776
894.33	96.02	95.4	93.696	92.566	1188.2	39.482	46.76
894.81	96.064	95.43	93.694	92.547	1189.1	39.441	46.718
895.29	96.12	95.481	93.686	92.528	1190.1	39.392	46.648
895.77	96.165	95.527	93.683	92.531	1191.1	39.359	46.628
896.26	96.191	95.548	93.695	92.571	1192	39.305	46.598
896.74	96.206	95.536	93.724	92.643	1193	39.259	46.528
897.22	96.228	95.504	93.762	92.726	1194	39.203	46.44
897.7	96.27	95.467	93.796	92.786	1194.9	39.16	46.392
898.18	96.331	95.443	93.815	92.799	1195.9	39.091	46.338
898.67	96.397	95.442	93.818	92.761	1196.9	39.048	46.258
899.15	96.445	95.463	93.817	92.691	1197.8	38.983	46.182
899.63	96.459	95.495	93.826	92.624	1198.8	38.92	46.153
900.11	96.435	95.526	93.858	92.593	1199.7	38.842	46.074
900.59	96.388	95.543	93.912	92.616	1200.7	38.768	45.974
901.08	96.341	95.537	93.971	92.686	1201.7	38.697	45.904
901.56	96.314	95.515	94.012	92.777	1202.6	38.62	45.831
902.04	96.319	95.49	94.019	92.85	1203.6	38.536	45.726
902.52	96.351	95.477	93.988	92.879	1204.6	38.461	45.626
903	96.395	95.488	93.938	92.859	1205.5	38.361	45.521
903.49	96.436	95.519	93.891	92.803	1206.5	38.286	45.457
903.97	96.468	95.558	93.863	92.738	1207.5	38.211	45.374
904.45	96.491	95.59	93.854	92.681	1208.4	38.14	45.282
904.93	96.509	95.608	93.851	92.639	1209.4	38.049	45.197
905.42	96.523	95.618	93.838	92.604	1210.4	37.963	45.132
905.9	96.526	95.627	93.811	92.568	1211.3	37.882	45.043
906.38	96.509	95.644	93.779	92.529	1212.3	37.832	44.964
906.86	96.472	95.669	93.757	92.496	1213.2	37.767	44.922
907.34	96.427	95.697	93.758	92.481	1214.2	37.714	44.875
907.83	96.399	95.72	93.78	92.493	1215.2	37.639	44.782
908.31	96.408	95.732	93.812	92.527	1216.1	37.609	44.733
908.79	96.454	95.729	93.841	92.573	1217.1	37.572	44.7
909.27	96.518	95.71	93.853	92.618	1218.1	37.529	44.648
909.75	96.567	95.673	93.844	92.65	1219	37.477	44.563
910.24	96.58	95.622	93.814	92.663	1220	37.432	44.504
910.72	96.557	95.567	93.768	92.654	1221	37.375	44.441
911.2	96.519	95.521	93.713	92.62	1221.9	37.303	44.345
911.68	96.494	95.498	93.657	92.564	1222.9	37.209	44.237
912.16	96.495	95.504	93.607	92.498	1223.9	37.124	44.176
912.65	96.515	95.536	93.569	92.436	1224.8	37.036	44.107
913.13	96.531	95.584	93.546	92.394	1225.8	36.97	44.023
913.61	96.526	95.64	93.534	92.383	1226.7	36.871	43.93
914.09	96.498	95.694	93.529	92.398	1227.7	36.777	43.866
914.58	96.461	95.742	93.522	92.422	1228.7	36.69	43.778
915.06	96.432	95.781	93.504	92.433	1229.6	36.634	43.674
915.54	96.422	95.805	93.467	92.411	1230.6	36.562	43.579
916.02	96.425	95.813	93.409	92.356	1231.6	36.478	43.519
916.5	96.427	95.802	93.335	92.278	1232.5	36.373	43.43
916.99	96.412	95.777	93.258	92.199	1233.5	36.293	43.332
917.47	96.375	95.744	93.191	92.136	1234.5	36.192	43.257
917.95	96.321	95.711	93.144	92.093	1235.4	36.123	43.225
918.43	96.265	95.686	93.115	92.063	1236.4	36.037	43.149
918.91	96.225	95.673	93.092	92.034	1237.4	35.962	43.063
919.4	96.213	95.672	93.063	91.997	1238.3	35.881	43.007
919.88	96.227	95.677	93.021	91.949	1239.3	35.808	42.973
920.36	96.253	95.681	92.964	91.896	1240.2	35.733	42.893
920.84	96.27	95.675	92.896	91.845	1241.2	35.666	42.821
921.33	96.255	95.657	92.821	91.802	1242.2	35.592	42.787
921.81	96.197	95.632	92.735	91.77	1243.1	35.582	42.791
922.29	96.101	95.608	92.637	91.747	1244.1	35.58	42.76
922.77	95.988	95.597	92.523	91.729	1245.1	35.57	42.746
923.25	95.877	95.601	92.399	91.706	1246	35.541	42.742
923.74	95.781	95.617	92.273	91.665	1247	35.536	42.74
924.22	95.699	95.638	92.156	91.598	1248	35.518	42.69
924.7	95.622	95.655	92.055	91.505	1248.9	35.495	42.665
925.18	95.541	95.666	91.971	91.397	1249.9	35.441	42.643
925.66	95.457	95.666	91.901	91.294	1250.9	35.403	42.619
926.15	95.374	95.652	91.837	91.211	1251.8	35.354	42.555
926.63	95.296	95.616	91.772	91.151	1252.8	35.311	42.52
927.11	95.226	95.552	91.702	91.111	1253.8	35.246	42.493
927.59	95.159	95.463	91.625	91.079	1254.7	35.186	42.437
928.07	95.093	95.358	91.546	91.048	1255.7	35.118	42.359
928.56	95.031	95.26	91.465	91.015	1256.6	35.07	42.319
929.04	94.977	95.188	91.385	90.981	1257.6	34.983	42.261
929.52	94.938	95.157	91.303	90.945	1258.6	34.897	42.184
930	94.915	95.164	91.22	90.905	1259.5	34.803	42.096
930.49	94.907	95.194	91.139	90.86	1260.5	34.756	42.069
930.97	94.909	95.225	91.066	90.812	1261.5	34.687	42.026
931.45	94.912	95.238	91.006	90.768	1262.4	34.62	41.958
931.93	94.905	95.223	90.961	90.739	1263.4	34.552	41.879
932.41	94.88	95.184	90.926	90.733	1264.4	34.504	41.85
932.9	94.83	95.131	90.89	90.75	1265.3	34.437	41.79
933.38	94.764	95.081	90.848	90.784	1266.3	34.38	41.726
933.86	94.698	95.055	90.798	90.825	1267.3	34.326	41.684
934.34	94.659	95.064	90.745	90.859	1268.2	34.296	41.671
934.82	94.665	95.116	90.698	90.88	1269.2	34.219	41.591
935.31	94.719	95.204	90.666	90.883	1270.1	34.158	41.509
935.79	94.809	95.316	90.658	90.875	1271.1	34.099	41.473
936.27	94.909	95.431	90.681	90.867	1272.1	34.028	41.437
936.75	95.003	95.536	90.74	90.87	1273	33.933	41.329
937.23	95.082	95.624	90.834	90.891	1274	33.87	41.256
937.72	95.151	95.694	90.947	90.927	1275	33.781	41.203
938.2	95.216	95.748	91.052	90.972	1275.9	33.721	41.166
938.68	95.276	95.786	91.124	91.015	1276.9	33.615	41.047
939.16	95.325	95.8	91.147	91.051	1277.9	33.504	40.949
939.65	95.352	95.784	91.126	91.078	1278.8	33.403	40.903
940.13	95.354	95.74	91.086	91.101	1279.8	33.319	40.849
940.61	95.335	95.678	91.06	91.128	1280.8	33.213	40.713
941.09	95.308	95.616	91.075	91.168	1281.7	33.134	40.638
941.57	95.289	95.575	91.142	91.23	1282.7	33.037	40.582
942.06	95.289	95.564	91.256	91.313	1283.6	32.947	40.496
942.54	95.316	95.581	91.4	91.408	1284.6	32.835	40.369
943.02	95.369	95.611	91.554	91.496	1285.6	32.745	40.304
943.5	95.438	95.637	91.698	91.556	1286.5	32.62	40.246
943.98	95.513	95.642	91.818	91.572	1287.5	32.513	40.153
944.47	95.582	95.623	91.91	91.548	1288.5	32.406	40.018
944.95	95.642	95.589	91.977	91.504	1289.4	32.328	39.956
945.43	95.695	95.558	92.03	91.466	1290.4	32.213	39.87
945.91	95.753	95.548	92.078	91.455	1291.4	32.097	39.762
946.4	95.829	95.572	92.124	91.474	1292.3	31.961	39.652
946.88	95.931	95.629	92.166	91.512	1293.3	31.854	39.574
947.36	96.06	95.708	92.197	91.554	1294.3	31.715	39.448
947.84	96.208	95.791	92.218	91.596	1295.2	31.592	39.323
948.32	96.361	95.864	92.238	91.643	1296.2	31.442	39.192
948.81	96.502	95.916	92.269	91.711	1297.2	31.295	39.08
949.29	96.615	95.946	92.323	91.81	1298.1	31.14	38.95
949.77	96.687	95.954	92.401	91.937	1299.1	31.005	38.81
950.25	96.717	95.945	92.497	92.072	1300	30.832	38.655
950.73	96.714	95.922	92.598	92.19	1301	30.574	38.485
951.22	96.696	95.892	92.696	92.269	1302	30.386	38.306
951.7	96.682	95.86	92.79	92.305	1302.9	30.147	38.119
952.18	96.689	95.834	92.885	92.314	1303.9	29.891	37.931
952.66	96.718	95.817	92.99	92.323	1304.9	29.644	37.74
953.14	96.761	95.805	93.11	92.355	1305.8	29.398	37.548
953.63	96.804	95.792	93.24	92.413	1306.8	29.147	37.367
954.11	96.835	95.768	93.37	92.482	1307.8	28.902	37.185
954.59	96.853	95.729	93.486	92.533	1308.7	28.692	37.001
955.07	96.861	95.675	93.572	92.549	1309.7	28.471	36.792
955.56	96.87	95.619	93.627	92.533	1310.7	28.268	36.608
956.04	96.887	95.573	93.66	92.511	1311.6	28.044	36.425
956.52	96.913	95.546	93.691	92.513	1312.6	27.853	36.239
957	96.942	95.534	93.741	92.56	1313.5	27.622	36.03
957.48	96.974	95.527	93.82	92.644	1314.5	27.404	35.849
957.97	97.008	95.514	93.924	92.743	1315.5	27.181	35.656
958.45	97.053	95.494	94.035	92.827	1316.4	26.969	35.467
958.93	97.114	95.48	94.133	92.881	1317.4	26.711	35.256
959.41	97.189	95.484	94.207	92.908	1318.4	26.507	35.117
959.89	97.265	95.511	94.257	92.92	1319.3	26.266	34.924
960.38	97.323	95.549	94.292	92.931	1320.3	26.077	34.75
960.86	97.353	95.575	94.325	92.944	1321.3	25.833	34.551
961.34	97.356	95.571	94.365	92.958	1322.2	25.311	34.417
961.82	97.347	95.534	94.418	92.966	1323.2	25.028	34.216
962.3	97.344	95.482	94.485	92.97	1324.2	24.79	34.002
962.79	97.362	95.435	94.563	92.973	1325.1	24.412	33.759
963.27	97.399	95.41	94.646	92.976	1326.1	24.11	32.979
963.75	97.443	95.405	94.724	92.981	1327	23.757	32.697
964.23	97.477	95.403	94.789	92.988	1328	23.605	32.622
964.72	97.491	95.388	94.84	93.001	1329	23.171	32.547
965.2	97.482	95.354	94.883	93.026	1329.9	22.98	32.301
965.68	97.46	95.306	94.925	93.073	1330.9	22.654	31.938
966.16	97.438	95.263	94.972	93.138	1331.9	22.513	31.988
966.64	97.431	95.242	95.016	93.205	1332.8	21.979	31.567
967.13	97.452	95.249	95.048	93.247	1333.8	21.601	31.396
967.61	97.502	95.282	95.058	93.246	1334.8	21.025	30.917
968.09	97.571	95.327	95.047	93.201	1335.7	20.478	30.54
968.57	97.643	95.369	95.028	93.133	1336.7	19.849	30.066
969.05	97.696	95.397	95.02	93.076	1337.7	19.249	29.634
969.54	97.72	95.411	95.037	93.057	1338.6	18.611	29.173
970.02	97.714	95.413	95.079	93.085	1339.6	17.946	28.656
970.5	97.691	95.41	95.138	93.148	1340.6	17.245	28.113
970.98	97.667	95.402	95.202	93.226	1341.5	16.6	27.658
971.47	97.651	95.39	95.265	93.295	1342.5	15.996	27.247
971.95	97.648	95.372	95.324	93.346	1343.4	15.301	26.738
972.43	97.656	95.352	95.381	93.376	1344.4	14.542	26.223
972.91	97.676	95.337	95.434	93.389	1345.4	13.796	25.705
973.39	97.706	95.337	95.48	93.394	1346.3	13.014	25.147
973.88	97.746	95.354	95.518	93.396	1347.3	12.254	24.619
974.36	97.789	95.382	95.546	93.4	1348.3	11.486	24.122
974.84	97.825	95.406	95.567	93.408	1349.2	10.744	23.577
975.32	97.845	95.416	95.584	93.418	1350.2	9.952	22.993
975.8	97.85	95.412	95.598	93.423	1351.2	9.234	22.517
976.29	97.851	95.406	95.61	93.419	1352.1	8.498	22.037
976.77	97.861	95.41	95.619	93.406	1353.1	7.821	21.576
977.25	97.886	95.431	95.629	93.392	1354.1	7.151	21.135
977.73	97.92	95.463	95.64	93.383	1355	6.443	20.655
978.21	97.949	95.487	95.65	93.382	1356	5.77	20.207
978.7	97.958	95.489	95.655	93.383	1356.9	5.222	19.86
979.18	97.945	95.464	95.655	93.378	1357.9	4.626	19.469
979.66	97.919	95.421	95.655	93.363	1358.9	4.119	19.148
980.14	97.899	95.375	95.661	93.345	1359.8	3.79	18.988
980.63	97.898	95.342	95.68	93.335	1360.8	3.504	18.767
981.11	97.918	95.329	95.708	93.342	1361.8	3.247	18.565
981.59	97.954	95.332	95.733	93.371	1362.7	3.101	18.501
982.07	97.994	95.342	95.741	93.417	1363.7	2.581	17.92
982.55	98.028	95.351	95.728	93.471	1364.7	2.443	17.901
983.04	98.052	95.355	95.703	93.525	1365.6	2.154	17.809
983.52	98.061	95.356	95.683	93.568	1366.6	1.741	17.577
984	98.054	95.358	95.681	93.594	1367.6	1.352	17.347
984.48	98.03	95.365	95.7	93.597	1368.5	1.025	17.098
984.96	97.991	95.378	95.726	93.576	1369.5	0.85	16.956
985.45	97.947	95.396	95.744	93.537	1370.4	1.213	17.318
985.93	97.911	95.414	95.746	93.488	1371.4	1.848	17.841
986.41	97.893	95.427	95.733	93.439	1372.4	2.84	18.69
986.89	97.897	95.425	95.716	93.398	1373.3	4.037	19.751
987.38	97.917	95.405	95.703	93.364	1374.3	5.571	20.929
987.86	97.941	95.365	95.697	93.339	1375.3	7.286	22.243
988.34	97.961	95.312	95.699	93.326	1376.2	9.121	23.801
988.82	97.974	95.255	95.706	93.329	1377.2	10.972	25.432
989.3	97.983	95.207	95.721	93.354	1378.2	12.968	27.059
989.79	97.994	95.181	95.745	93.399	1379.1	14.929	28.605
990.27	98.014	95.182	95.78	93.453	1380.1	16.807	30.104
990.75	98.042	95.211	95.823	93.5	1381.1	18.551	31.508
991.23	98.077	95.262	95.866	93.529	1382	20.127	32.696
991.71	98.116	95.323	95.902	93.534	1383	21.475	33.659
992.2	98.157	95.375	95.923	93.52	1383.9	22.57	34.45
992.68	98.199	95.405	95.926	93.494	1384.9	23.174	34.898
993.16	98.237	95.404	95.909	93.466	1385.9	23.73	35.27
993.64	98.267	95.377	95.871	93.44	1386.8	24.173	35.569
994.12	98.284	95.335	95.819	93.415	1387.8	24.409	35.699
994.61	98.285	95.297	95.764	93.388	1388.8	24.686	35.913
995.09	98.267	95.272	95.72	93.358	1389.7	24.986	36.171
995.57	98.234	95.263	95.699	93.324	1390.7	25.268	36.375
996.05	98.188	95.26	95.709	93.289	1391.7	25.544	36.606
996.54	98.133	95.251	95.749	93.26	1392.6	25.862	36.873
997.02	98.076	95.228	95.807	93.237	1393.6	26.204	37.191
997.5	98.028	95.193	95.863	93.219	1394.6	26.539	37.437
997.98	97.999	95.16	95.893	93.2	1395.5	26.899	37.669
998.46	97.997	95.141	95.881	93.173	1396.5	27.314	38.008
998.95	98.023	95.139	95.825	93.133	1397.5	27.733	38.347
999.43	98.067	95.15	95.738	93.083	1398.4	28.131	38.674
999.91	98.109	95.16	95.65	93.031	1399.4	28.466	38.878
1000.4	98.13	95.155	95.587	92.988	1400.3	28.796	39.082
1000.9	98.122	95.132	95.566	92.96	1401.3	29.102	39.351
1001.4	98.089	95.094	95.584	92.946	1402.3	29.392	39.573
1001.8	98.047	95.055	95.621	92.938	1403.2	29.522	39.659
1002.3	98.018	95.026	95.654	92.927	1404.2	29.652	39.747
1002.8	98.013	95.013	95.67	92.91	1405.2	29.725	39.726
1003.3	98.035	95.015	95.672	92.89	1406.1	29.801	39.738
1003.8	98.072	95.023	95.671	92.874	1407.1	29.893	39.804
1004.2	98.111	95.03	95.682	92.868	1408.1	29.952	39.8
1004.7	98.138	95.027	95.712	92.873	1409	29.525	39.613
1005.2	98.152	95.011	95.757	92.88	1410	29.223	39.401
1005.7	98.156	94.984	95.805	92.882	1411	29.057	39.169
1006.2	98.159	94.955	95.848	92.873	1411.9	28.78	38.859
1006.7	98.167	94.932	95.884	92.857	1412.9	28.624	38.551
1007.1	98.181	94.917	95.916	92.846	1413.8	28.498	38.249
1007.6	98.194	94.906	95.951	92.85	1414.8	27.843	37.717
1008.1	98.199	94.885	95.991	92.87	1415.8	27.147	37.162
1008.6	98.191	94.84	96.03	92.893	1416.7	26.412	36.568
1009.1	98.173	94.768	96.058	92.898	1417.7	25.681	35.951
1009.6	98.157	94.682	96.068	92.869	1418.7	25.065	35.518
1010	98.159	94.61	96.059	92.806	1419.6	23.736	34.328
1010.5	98.188	94.58	96.04	92.725	1420.6	22.866	33.622
1011	98.246	94.604	96.024	92.652	1421.6	22.157	33.132
1011.5	98.319	94.672	96.019	92.604	1422.5	21.352	32.547
1012	98.385	94.755	96.02	92.583	1423.5	20.499	31.878
1012.4	98.423	94.817	96.021	92.576	1424.5	19.415	30.967
1012.9	98.423	94.837	96.012	92.565	1425.4	18.606	30.365
1013.4	98.391	94.811	95.991	92.54	1426.4	17.865	29.819
1013.9	98.342	94.755	95.966	92.503	1427.3	17.138	29.306
1014.4	98.3	94.688	95.952	92.467	1428.3	16.527	28.911
1014.9	98.279	94.626	95.957	92.44	1429.3	15.963	28.563
1015.3	98.277	94.574	95.981	92.424	1430.2	15.095	27.803
1015.8	98.283	94.533	96.012	92.41	1431.2	14.459	27.372
1016.3	98.278	94.499	96.037	92.387	1432.2	14.148	27.287
1016.8	98.254	94.47	96.044	92.351	1433.1	13.829	27.073
1017.3	98.217	94.447	96.036	92.31	1434.1	13.802	27.117
1017.7	98.182	94.429	96.021	92.28	1435.1	14.17	27.602
1018.2	98.169	94.417	96.013	92.276	1436	14.81	28.323
1018.7	98.192	94.409	96.02	92.302	1437	15.79	28.721
1019.2	98.249	94.406	96.038	92.344	1438	17.188	29.842
1019.7	98.328	94.405	96.059	92.376	1438.9	18.707	31.24
1020.2	98.408	94.401	96.07	92.375	1439.9	20.488	32.698
1020.6	98.467	94.385	96.066	92.33	1440.9	22.308	34.127
1021.1	98.49	94.348	96.051	92.247	1441.8	24.083	35.521
1021.6	98.471	94.287	96.034	92.15	1442.8	25.746	36.841
1022.1	98.42	94.209	96.03	92.062	1443.7	26.87	37.827
1022.6	98.353	94.129	96.047	91.999	1444.7	27.764	38.645
1023.1	98.288	94.063	96.089	91.961	1445.7	29.393	39.596
1023.5	98.236	94.019	96.147	91.942	1446.6	30.38	40.448
1024	98.194	93.993	96.211	91.933	1447.6	31.254	41.151
1024.5	98.151	93.973	96.263	91.929	1448.6	32.053	41.631
1025	98.097	93.946	96.293	91.931	1449.5	32.719	42.195
1025.5	98.035	93.908	96.293	91.938	1450.5	33.299	42.753
1025.9	97.98	93.865	96.267	91.947	1451.5	33.766	43.148
1026.4	97.952	93.831	96.224	91.95	1452.4	34.184	43.397
1026.9	97.964	93.815	96.176	91.94	1453.4	34.554	43.709
1027.4	98.013	93.818	96.135	91.918	1454.4	34.903	44.072
1027.9	98.086	93.831	96.106	91.891	1455.3	35.228	44.406
1028.4	98.159	93.84	96.09	91.87	1456.3	35.505	44.737
1028.8	98.215	93.839	96.087	91.865	1457.2	35.694	44.75
1029.3	98.247	93.83	96.097	91.876	1458.2	35.912	44.865
1029.8	98.257	93.822	96.119	91.898	1459.2	36.091	44.928
1030.3	98.258	93.825	96.153	91.924	1460.1	36.239	45.076
1030.8	98.261	93.841	96.189	91.946	1461.1	36.364	45.234
1031.2	98.272	93.861	96.215	91.961	1462.1	36.472	45.325
1031.7	98.292	93.871	96.223	91.97	1463	36.544	45.387
1032.2	98.311	93.855	96.209	91.974	1464	36.624	45.527
1032.7	98.316	93.808	96.183	91.974	1465	36.54	45.351
1033.2	98.297	93.739	96.159	91.967	1465.9	36.389	45.085
1033.7	98.253	93.667	96.153	91.951	1466.9	36.377	45.117
1034.1	98.192	93.616	96.171	91.927	1467.9	36.312	45.066
1034.6	98.129	93.599	96.206	91.899	1468.8	36.253	45.014
1035.1	98.079	93.615	96.244	91.87	1469.8	36.164	44.915
1035.6	98.051	93.649	96.269	91.845	1470.7	36.13	44.939
1036.1	98.047	93.677	96.273	91.821	1471.7	36.039	44.896
1036.6	98.059	93.684	96.257	91.795	1472.7	35.823	44.564
1037	98.078	93.663	96.23	91.765	1473.6	35.716	44.382
1037.5	98.095	93.624	96.198	91.731	1474.6	35.696	44.362
1038	98.099	93.58	96.168	91.703	1475.6	35.686	44.416
1038.5	98.089	93.545	96.147	91.689	1476.5	35.572	44.241
1039	98.069	93.528	96.14	91.696	1477.5	35.495	44.118
1039.4	98.051	93.531	96.153	91.722	1478.5	35.456	44.097
1039.9	98.049	93.552	96.187	91.756	1479.4	35.397	44.033
1040.4	98.07	93.586	96.234	91.787	1480.4	35.246	43.862
1040.9	98.111	93.624	96.282	91.804	1481.4	35.058	43.618
1041.4	98.156	93.657	96.316	91.8	1482.3	34.883	43.391
1041.9	98.184	93.675	96.332	91.777	1483.3	34.72	43.198
1042.3	98.18	93.673	96.332	91.741	1484.2	34.521	42.946
1042.8	98.145	93.657	96.327	91.701	1485.2	34.292	42.679
1043.3	98.093	93.639	96.328	91.67	1486.2	34.072	42.455
1043.8	98.051	93.632	96.342	91.655	1487.1	33.778	42.131
1044.3	98.039	93.642	96.366	91.658	1488.1	33.472	41.764
1044.7	98.061	93.666	96.394	91.675	1489.1	33.232	41.54
1045.2	98.104	93.693	96.421	91.699	1490	32.914	41.159
1045.7	98.141	93.712	96.444	91.723	1491	32.491	40.667
1046.2	98.15	93.714	96.465	91.745	1492	32.187	40.354
1046.7	98.125	93.699	96.484	91.762	1492.9	31.91	40.085
1047.2	98.077	93.675	96.495	91.771	1493.9	31.576	39.777
1047.6	98.032	93.652	96.494	91.764	1494.9	31.226	39.498
1048.1	98.008	93.639	96.474	91.732	1495.8	30.852	39.162
1048.6	98.014	93.636	96.437	91.671	1496.8	30.275	38.484
1049.1	98.033	93.637	96.391	91.589	1497.8	29.931	38.246
1049.6	98.042	93.629	96.347	91.508	1498.7	29.511	37.865
1050.1	98.022	93.599	96.314	91.452	1499.7	28.985	37.284
1050.5	97.969	93.546	96.297	91.437	1500.6	28.621	37.002
1051	97.903	93.484	96.294	91.462	1501.6	28.189	36.625
1051.5	97.849	93.436	96.301	91.51	1502.6	27.722	36.185
1052	97.828	93.424	96.313	91.557	1503.5	27.319	35.861
1052.5	97.846	93.456	96.329	91.586	1504.5	26.971	35.7
1052.9	97.889	93.519	96.35	91.589	1505.5	26.639	35.546
1053.4	97.935	93.587	96.376	91.573	1506.4	26.004	34.893
1053.9	97.967	93.63	96.405	91.553	1507.4	25.074	33.821
1054.4	97.98	93.631	96.437	91.541	1508.4	24.555	33.549
1054.9	97.979	93.593	96.468	91.546	1509.3	24.115	33.273
1055.4	97.975	93.532	96.497	91.569	1510.3	23.583	32.834
1055.8	97.971	93.472	96.523	91.607	1511.3	23.16	32.6
1056.3	97.965	93.429	96.542	91.65	1512.2	22.594	32.158
1056.8	97.946	93.404	96.549	91.686	1513.2	21.96	31.605
1057.3	97.904	93.391	96.538	91.702	1514.1	21.534	31.375
1057.8	97.835	93.373	96.506	91.693	1515.1	21.109	31.099
1058.2	97.746	93.338	96.458	91.661	1516.1	20.714	30.923
1058.7	97.651	93.284	96.402	91.615	1517	20.149	30.475
1059.2	97.568	93.223	96.354	91.565	1518	19.394	29.753
1059.7	97.512	93.175	96.323	91.519	1519	19.299	29.899
1060.2	97.492	93.161	96.313	91.476	1519.9	19.136	29.992
1060.7	97.507	93.193	96.324	91.436	1520.9	18.646	29.583
1061.1	97.544	93.266	96.348	91.401	1521.9	17.929	28.867
1061.6	97.585	93.36	96.38	91.382	1522.8	17.44	28.463
1062.1	97.61	93.451	96.418	91.385	1523.8	17.305	28.524
1062.6	97.609	93.518	96.457	91.414	1524.8	17.141	28.544
1063.1	97.581	93.55	96.492	91.461	1525.7	16.638	28.058
1063.5	97.537	93.55	96.514	91.509	1526.7	16.33	27.897
1064	97.493	93.523	96.516	91.544	1527.6	16.07	27.777
1064.5	97.456	93.474	96.498	91.561	1528.6	15.71	27.47
1065	97.43	93.407	96.466	91.561	1529.6	15.456	27.306
1065.5	97.406	93.326	96.435	91.553	1530.5	15.296	27.3
1066	97.375	93.241	96.418	91.544	1531.5	15.075	27.2
1066.4	97.332	93.165	96.422	91.538	1532.5	14.895	27.156
1066.9	97.278	93.112	96.442	91.54	1533.4	14.578	26.947
1067.4	97.221	93.089	96.465	91.553	1534.4	14.006	26.311
1067.9	97.168	93.093	96.482	91.576	1535.4	13.85	26.33
1068.4	97.126	93.109	96.489	91.608	1536.3	13.659	26.298
1068.9	97.095	93.124	96.491	91.636	1537.3	13.509	26.361
1069.3	97.077	93.131	96.497	91.651	1538.3	13.612	26.737
1069.8	97.069	93.131	96.514	91.647	1539.2	13.066	26.387
1070.3	97.068	93.138	96.54	91.631	1540.2	12.049	25.203
1070.8	97.07	93.162	96.57	91.621	1541.2	11.971	25.382
1071.3	97.066	93.207	96.6	91.632	1542.1	11.657	25.204
1071.7	97.051	93.263	96.624	91.668	1543.1	11.23	24.798
1072.2	97.024	93.311	96.642	91.717	1544	11.131	24.893
1072.7	96.991	93.336	96.65	91.76	1545	10.769	24.65
1073.2	96.967	93.332	96.641	91.783	1546	10.265	24.168
1073.7	96.962	93.308	96.613	91.781	1546.9	10.132	24.234
1074.2	96.976	93.283	96.567	91.762	1547.9	9.985	24.256
1074.6	96.994	93.273	96.517	91.738	1548.9	9.976	24.443
1075.1	96.991	93.283	96.479	91.718	1549.8	9.707	24.183
1075.6	96.943	93.303	96.467	91.704	1550.8	9.257	23.632
1076.1	96.843	93.317	96.483	91.697	1551.8	9.455	23.999
1076.6	96.702	93.311	96.521	91.697	1552.7	9.721	24.426
1077	96.552	93.284	96.562	91.706	1553.7	10.019	24.862
1077.5	96.428	93.248	96.594	91.722	1554.7	9.874	24.421
1078	96.353	93.22	96.607	91.744	1555.6	10.263	24.774
1078.5	96.332	93.215	96.596	91.766	1556.6	11.004	25.753
1079	96.346	93.236	96.564	91.784	1557.5	11.775	26.764
1079.5	96.372	93.274	96.518	91.799	1558.5	12.178	26.797
1079.9	96.389	93.311	96.467	91.813	1559.5	12.243	26.654
1080.4	96.39	93.333	96.42	91.828	1560.4	13.069	26.934
1080.9	96.376	93.335	96.386	91.841	1561.4	14.265	28.112
1081.4	96.355	93.322	96.366	91.848	1562.4	15.324	29.19
1081.9	96.326	93.305	96.357	91.849	1563.3	16.398	30.181
1082.4	96.285	93.291	96.35	91.85	1564.3	17.467	31.129
1082.8	96.226	93.286	96.341	91.857	1565.3	18.618	31.945
1083.3	96.147	93.288	96.331	91.873	1566.2	19.796	32.917
1083.8	96.052	93.29	96.324	91.892	1567.2	20.987	33.995
1084.3	95.948	93.287	96.325	91.902	1568.2	22.205	35.079
1084.8	95.844	93.279	96.333	91.891	1569.1	23.406	36.124
1085.2	95.744	93.269	96.339	91.859	1570.1	24.823	37.074
1085.7	95.657	93.263	96.338	91.82	1571	26.079	38.093
1086.2	95.591	93.27	96.328	91.791	1572	27.305	39.131
1086.7	95.553	93.291	96.318	91.785	1573	28.563	40.152
1087.2	95.545	93.32	96.317	91.8	1573.9	29.595	40.987
1087.7	95.557	93.344	96.33	91.821	1574.9	30.536	41.796
1088.1	95.567	93.354	96.353	91.827	1575.9	31.489	42.561
1088.6	95.553	93.343	96.373	91.812	1576.8	32.544	43.098
1089.1	95.499	93.32	96.378	91.78	1577.8	33.318	43.764
1089.6	95.407	93.301	96.364	91.747	1578.8	34.086	44.374
1090.1	95.288	93.302	96.335	91.727	1579.7	34.871	44.958
1090.5	95.162	93.329	96.299	91.726	1580.7	35.578	45.493
1091	95.049	93.372	96.261	91.734	1581.7	36.038	45.844
1091.5	94.957	93.408	96.222	91.736	1582.6	36.345	46.042
1092	94.887	93.409	96.177	91.724	1583.6	36.629	46.241
1092.5	94.826	93.355	96.124	91.698	1584.5	36.781	46.315
1093	94.758	93.247	96.063	91.665	1585.5	36.896	46.345
1093.4	94.663	93.104	96.001	91.634	1586.5	36.858	46.243
1093.9	94.532	92.961	95.941	91.606	1587.4	36.779	46.136
1094.4	94.372	92.851	95.887	91.576	1588.4	36.047	45.323
1094.9	94.204	92.794	95.837	91.538	1589.4	35.661	45.053
1095.4	94.055	92.784	95.79	91.491	1590.3	35.105	44.499
1095.9	93.941	92.799	95.743	91.438	1591.3	34.472	43.908
1096.3	93.858	92.809	95.698	91.39	1592.3	33.604	43.136
1096.8	93.78	92.793	95.654	91.352	1593.2	32.648	42.296
1097.3	93.677	92.745	95.609	91.322	1594.2	31.434	41.234
1097.8	93.532	92.679	95.561	91.294	1595.2	30.011	40.002
1098.3	93.349	92.613	95.507	91.258	1596.1	28.509	38.87
1098.7	93.147	92.558	95.444	91.209	1597.1	27.156	37.815
1099.2	92.949	92.512	95.37	91.143	1598.1	25.89	36.765
1099.7	92.764	92.466	95.281	91.064	1599	24.486	35.695
1100.2	92.586	92.408	95.171	90.972	1600	23.248	34.741
1100.7	92.4	92.33	95.039	90.869	1600.9	22.304	33.993
1101.2	92.193	92.238	94.888	90.759	1601.9	21.581	33.437
1101.6	91.963	92.138	94.725	90.644	1602.9	21.051	33.062
1102.1	91.715	92.038	94.557	90.53	1603.8	20.44	32.552
1102.6	91.457	91.941	94.384	90.419	1604.8	19.841	32.112
1103.1	91.196	91.845	94.202	90.311	1605.8	19.113	31.634
1103.6	90.935	91.753	94.001	90.203	1606.7	18.253	31.061
1104	90.682	91.666	93.779	90.091	1607.7	17.174	30.343
1104.5	90.444	91.593	93.545	89.976	1608.7	16.435	29.844
1105	90.232	91.542	93.316	89.86	1609.6	15.763	29.297
1105.5	90.052	91.517	93.11	89.751	1610.6	15.525	29.082
1106	89.905	91.52	92.936	89.66	1611.6	15.637	29.119
1106.5	89.783	91.545	92.788	89.597	1612.5	16.184	29.583
1106.9	89.673	91.582	92.655	89.568	1613.5	16.982	30.294
1107.4	89.566	91.62	92.524	89.569	1614.4	18.055	31.263
1107.9	89.456	91.65	92.39	89.587	1615.4	19.224	32.401
1108.4	89.346	91.667	92.259	89.604	1616.4	20.435	33.465
1108.9	89.241	91.67	92.138	89.603	1617.3	21.999	34.359
1109.4	89.147	91.662	92.034	89.578	1618.3	23.26	35.474
1109.8	89.069	91.651	91.949	89.538	1619.3	24.466	36.55
1110.3	89.006	91.642	91.877	89.499	1620.2	25.695	37.573
1110.8	88.957	91.646	91.806	89.476	1621.2	26.727	38.425
1111.3	88.922	91.669	91.728	89.472	1622.2	27.7	39.262
1111.8	88.906	91.72	91.641	89.479	1623.1	28.624	40.004
1112.2	88.913	91.806	91.553	89.485	1624.1	29.531	40.588
1112.7	88.952	91.926	91.478	89.484	1625.1	30.353	41.249
1113.2	89.025	92.076	91.426	89.48	1626	31.145	41.892
1113.7	89.132	92.245	91.399	89.48	1627	31.675	42.321
1114.2	89.266	92.423	91.388	89.491	1627.9	32.127	42.61
1114.7	89.417	92.599	91.381	89.512	1628.9	32.557	42.904
1115.1	89.576	92.765	91.372	89.538	1629.9	32.969	43.234
1115.6	89.737	92.912	91.368	89.57	1630.8	33.359	43.521
1116.1	89.899	93.036	91.385	89.611	1631.8	33.641	43.719
1116.6	90.063	93.135	91.439	89.675	1632.8	33.925	43.907
1117.1	90.231	93.212	91.533	89.769	1633.7	34.22	44.206
1117.5	90.404	93.277	91.653	89.891	1634.7	34.494	44.63
1118	90.579	93.345	91.776	90.025	1635.7	34.339	44.183
1118.5	90.751	93.422	91.881	90.148	1636.6	34.427	44.147
1119	90.912	93.505	91.962	90.24	1637.6	34.647	44.323
1119.5	91.056	93.579	92.026	90.296	1638.6	34.775	44.34
1120	91.179	93.628	92.092	90.321	1639.5	34.937	44.515
1120.4	91.285	93.643	92.177	90.336	1640.5	35.087	44.605
1120.9	91.383	93.631	92.287	90.362	1641.5	35.242	44.709
1121.4	91.484	93.61	92.418	90.414	1642.4	35.364	44.784
1121.9	91.598	93.599	92.56	90.493	1643.4	35.503	44.888
1122.4	91.726	93.609	92.697	90.586	1644.3	35.67	45.084
1122.8	91.859	93.64	92.819	90.675	1645.3	35.867	45.364
1123.3	91.989	93.682	92.918	90.741	1646.3	35.955	45.322
1123.8	92.108	93.727	92.993	90.781	1647.2	36.054	45.321
1124.3	92.215	93.767	93.048	90.799	1648.2	36.1	45.261
1124.8	92.316	93.803	93.089	90.811	1649.2	36.237	45.351
1125.3	92.417	93.834	93.124	90.829	1650.1	36.455	45.582
1125.7	92.52	93.862	93.163	90.86	1651.1	36.705	45.919
1126.2	92.622	93.887	93.213	90.904	1652.1	36.941	46.409
1126.7	92.722	93.914	93.276	90.957	1653	36.698	46.234
1127.2	92.819	93.944	93.351	91.012	1654	36.694	45.735
1127.7	92.913	93.976	93.432	91.066	1655	37.085	45.971
1128.2	93.007	94.006	93.513	91.114	1655.9	37.362	46.268
1128.6	93.099	94.027	93.587	91.151	1656.9	37.577	46.52
1129.1	93.191	94.034	93.649	91.174	1657.8	37.772	46.696
1129.6	93.284	94.028	93.701	91.183	1658.8	37.985	46.878
1130.1	93.38	94.018	93.749	91.187	1659.8	38.194	47.057
1130.6	93.484	94.015	93.801	91.2	1660.7	38.38	47.254
1131	93.593	94.023	93.864	91.235	1661.7	38.574	47.467
1131.5	93.7	94.041	93.94	91.296	1662.7	38.765	47.629
1132	93.795	94.06	94.025	91.375	1663.6	38.919	47.695
1132.5	93.874	94.071	94.112	91.454	1664.6	39.096	47.889
1133	93.936	94.068	94.193	91.517	1665.6	39.268	48.068
1133.5	93.989	94.052	94.264	91.553	1666.5	39.455	48.294
1133.9	94.04	94.026	94.328	91.568	1667.5	39.645	48.545
1134.4	94.094	93.996	94.394	91.578	1668.5	39.825	48.837
1134.9	94.154	93.969	94.468	91.601	1669.4	39.953	48.813
1135.4	94.224	93.954	94.555	91.649	1670.4	40.136	48.985
1135.9	94.306	93.962	94.651	91.719	1671.3	40.291	49.181
1136.3	94.402	93.998	94.75	91.803	1672.3	40.422	49.242
1136.8	94.51	94.057	94.843	91.886	1673.3	40.619	49.483
1137.3	94.622	94.124	94.924	91.958	1674.2	40.825	49.861
1137.8	94.732	94.18	94.995	92.019	1675.2	40.959	50.001
1138.3	94.838	94.211	95.06	92.073	1676.2	41.075	49.846
1138.8	94.938	94.218	95.127	92.123	1677.1	41.266	50.09
1139.2	95.034	94.214	95.199	92.173	1678.1	41.463	50.36
1139.7	95.123	94.215	95.279	92.22	1679.1	41.648	50.63
1140.2	95.205	94.225	95.364	92.261	1680	41.815	50.756
1140.7	95.277	94.236	95.451	92.296	1681	41.951	50.827
1141.2	95.34	94.231	95.542	92.329	1682	42.124	51.127
1141.7	95.396	94.196	95.638	92.372	1682.9	42.313	51.504
1142.1	95.445	94.13	95.739	92.428	1683.9	42.481	51.765
1142.6	95.487	94.053	95.843	92.494	1684.8	42.52	51.497
1143.1	95.522	93.989	95.937	92.552	1685.8	42.736	51.703
1143.6	95.553	93.963	96.009	92.582	1686.8	42.941	51.989
1144.1	95.587	93.983	96.047	92.571	1687.7	43.115	52.213
1144.5	95.627	94.045	96.049	92.523	1688.7	43.278	52.353
1145	95.667	94.126	96.022	92.459	1689.7	43.444	52.541
1145.5	95.696	94.199	95.979	92.404	1690.6	43.624	52.72
1146	95.704	94.241	95.932	92.375	1691.6	43.789	52.912
1146.5	95.692	94.24	95.892	92.376	1692.6	43.962	53.109
1147	95.672	94.201	95.868	92.399	1693.5	44.109	53.28
1147.4	95.663	94.147	95.87	92.436	1694.5	44.258	53.487
1147.9	95.681	94.108	95.911	92.486	1695.5	44.38	53.674
1148.4	95.725	94.107	95.993	92.551	1696.4	44.428	53.65
1148.9	95.787	94.149	96.105	92.633	1697.4	44.554	53.778
1149.4	95.855	94.218	96.22	92.719	1698.4	44.694	53.971
1149.8	95.924	94.286	96.307	92.786	1699.3	44.827	54.199
1150.3	95.995	94.326	96.343	92.813	1700.3	44.895	54.243
1150.8	96.065	94.329	96.326	92.792	1701.2	44.995	54.204
1151.3	96.126	94.299	96.274	92.736	1702.2	45.101	54.381
1151.8	96.165	94.254	96.215	92.672	1703.2	45.191	54.544
1152.3	96.171	94.212	96.17	92.628	1704.1	45.295	54.686
1152.7	96.148	94.187	96.145	92.617	1705.1	45.406	54.795
1153.2	96.11	94.184	96.132	92.634	1706.1	45.486	54.901
1153.7	96.079	94.2	96.119	92.666	1707	45.568	54.953
1154.2	96.068	94.228	96.099	92.693	1708	45.674	55.048
1154.7	96.081	94.259	96.071	92.707	1709	45.757	55.16
1155.2	96.109	94.282	96.041	92.704	1709.9	45.837	55.256
1155.6	96.136	94.287	96.018	92.691	1710.9	45.925	55.322
1156.1	96.148	94.273	96.008	92.676	1711.9	45.994	55.416
1156.6	96.143	94.247	96.015	92.662	1712.8	46.072	55.519
1157.1	96.128	94.218	96.033	92.649	1713.8	46.157	55.627
1157.6	96.119	94.201	96.053	92.635	1714.7	46.24	55.703
1158	96.129	94.199	96.065	92.617	1715.7	46.294	55.762
1158.5	96.161	94.211	96.061	92.592	1716.7	46.354	55.902
1159	96.206	94.226	96.038	92.567	1717.6	46.396	55.982
1159.5	96.248	94.235	96.002	92.548	1718.6	46.414	55.927
1160	96.272	94.231	95.961	92.539	1719.6	46.486	55.992
1160.5	96.275	94.217	95.922	92.545	1720.5	46.57	56.094
1160.9	96.262	94.197	95.891	92.564	1721.5	46.643	56.174
1161.4	96.246	94.178	95.867	92.59	1722.5	46.707	56.253
1161.9	96.241	94.167	95.847	92.618	1723.4	46.772	56.301
1162.4	96.248	94.162	95.831	92.642	1724.4	46.842	56.358
1162.9	96.267	94.162	95.815	92.656	1725.4	46.909	56.439
1163.3	96.289	94.165	95.8	92.66	1726.3	46.963	56.517
1163.8	96.308	94.171	95.787	92.654	1727.3	47.013	56.549
1164.3	96.32	94.182	95.778	92.641	1728.2	47.053	56.601
1164.8	96.328	94.202	95.775	92.626	1729.2	47.073	56.68
1165.3	96.335	94.232	95.779	92.616	1730.2	47.08	56.644
1165.8	96.346	94.268	95.787	92.612	1731.1	47.103	56.655
1166.2	96.364	94.306	95.797	92.614	1732.1	47.166	56.756
1166.7	96.386	94.338	95.801	92.616	1733.1	47.21	56.88
1167.2	96.407	94.359	95.798	92.609	1734	47.161	56.867
1167.7	96.421	94.364	95.787	92.59	1735	47.112	56.671
1168.2	96.424	94.355	95.771	92.559	1736	47.16	56.708
1168.7	96.416	94.335	95.756	92.521	1736.9	47.194	56.767
1169.1	96.405	94.31	95.742	92.485	1737.9	47.229	56.828
1169.6	96.397	94.285	95.728	92.458	1738.9	47.251	56.94
1170.1	96.403	94.266	95.711	92.443	1739.8	47.25	56.9
1170.6	96.422	94.252	95.687	92.437	1740.8	47.264	56.794
1171.1	96.452	94.242	95.657	92.433	1741.8	47.301	56.861
1171.5	96.484	94.233	95.621	92.421	1742.7	47.336	56.921
1172	96.507	94.223	95.583	92.396	1743.7	47.329	56.87
1172.5	96.516	94.21	95.547	92.355	1744.6	47.319	56.852
1173	96.505	94.195	95.514	92.305	1745.6	47.339	56.9
1173.5	96.481	94.179	95.488	92.257	1746.6	47.332	56.92
1174	96.451	94.162	95.468	92.227	1747.5	47.36	56.945
1174.4	96.424	94.145	95.453	92.223	1748.5	47.398	56.954
1174.9	96.41	94.129	95.442	92.248	1749.5	47.378	56.909
1175.4	96.411	94.119	95.432	92.29	1750.4	47.369	56.972
1175.9	96.427	94.122	95.42	92.328	1751.4	47.372	56.92
1176.4	96.454	94.142	95.403	92.347	1752.4	47.369	56.875
1176.8	96.485	94.181	95.38	92.336	1753.3	47.39	56.917
1177.3	96.514	94.23	95.352	92.299	1754.3	47.428	56.949
1177.8	96.534	94.276	95.319	92.248	1755.3	47.441	56.989
1178.3	96.541	94.303	95.284	92.198	1756.2	47.452	57.015
1178.8	96.535	94.304	95.249	92.157	1757.2	47.45	56.977
1179.3	96.52	94.278	95.219	92.125	1758.1	47.447	56.962
1179.7	96.503	94.235	95.198	92.094	1759.1	47.459	56.973
1180.2	96.489	94.188	95.187	92.058	1760.1	47.475	57
1180.7	96.48	94.148	95.183	92.012	1761	47.492	57.028
1181.2	96.476	94.12	95.179	91.961	1762	47.471	56.983
1181.7	96.474	94.106	95.17	91.915	1763	47.468	56.97
1182.2	96.47	94.099	95.153	91.884	1763.9	47.483	56.999
1182.6	96.46	94.093	95.134	91.874	1764.9	47.498	56.999
1183.1	96.44	94.08	95.119	91.882	1765.9	47.506	57.012
1183.6	96.406	94.054	95.112	91.898	1766.8	47.509	57.034
1184.1	96.36	94.015	95.105	91.91	1767.8	47.511	57.03
1184.6	96.309	93.971	95.084	91.904	1768.8	47.498	56.98
1185	96.266	93.936	95.039	91.877	1769.7	47.509	57.022
1185.5	96.246	93.921	94.967	91.833	1770.7	47.511	57.084
1186	96.258	93.932	94.884	91.781	1771.6	47.517	57.104
1186.5	96.296	93.962	94.813	91.734	1772.6	47.51	57.047
1187	96.345	93.996	94.771	91.698	1773.6	47.488	56.982
1187.5	96.388	94.022	94.761	91.674	1774.5	47.495	56.998
1187.9	96.412	94.034	94.77	91.658	1775.5	47.506	57.003
1188.4	96.417	94.036	94.775	91.642	1776.5	47.509	56.986
1188.9	96.411	94.038	94.762	91.622	1777.4	47.505	56.99
1189.4	96.404	94.047	94.731	91.597	1778.4	47.498	57.005
1189.9	96.402	94.062	94.697	91.572	1779.4	47.51	57.019
1190.3	96.4	94.075	94.674	91.551	1780.3	47.504	57.027
1190.8	96.396	94.077	94.67	91.536	1781.3	47.492	56.988
1191.3	96.386	94.065	94.68	91.524	1782.3	47.49	56.984
1191.8	96.376	94.042	94.69	91.51	1783.2	47.496	56.982
1192.3	96.372	94.016	94.688	91.489	1784.2	47.489	56.995
1192.8	96.378	93.995	94.669	91.457	1785.1	47.477	56.965
1193.2	96.391	93.984	94.637	91.417	1786.1	47.476	56.948
1193.7	96.402	93.986	94.604	91.374	1787.1	47.472	56.964
1194.2	96.4	94.001	94.579	91.331	1788	47.469	56.966
1194.7	96.38	94.029	94.566	91.289	1789	47.475	56.956
1195.2	96.345	94.067	94.56	91.249	1790	47.477	56.973
1195.6	96.304	94.113	94.553	91.206	1790.9	47.455	56.97
1196.1	96.268	94.157	94.534	91.162	1791.9	47.437	56.973
1196.6	96.245	94.19	94.499	91.12	1792.9	47.448	56.933
1197.1	96.235	94.207	94.452	91.087	1793.8	47.459	56.906
1197.6	96.236	94.209	94.402	91.066	1794.8	47.453	56.925
1198.1	96.239	94.205	94.361	91.053	1795.8	47.447	56.92
1198.5	96.241	94.205	94.335	91.038	1796.7	47.44	56.912
1199	96.237	94.217	94.324	91.009	1797.7	47.441	56.906
1199.5	96.229	94.238	94.318	90.961	1798.7	47.447	56.929
1200	96.216	94.261	94.312	90.893	1799.6	47.452	56.921
1200.5	96.201	94.278	94.3	90.815	1800.6	47.436	56.895
1201	96.182	94.285	94.282	90.742	1801.5	47.425	56.895
1201.4	96.16	94.283	94.261	90.685	1802.5	47.411	56.881
1201.9	96.133	94.277	94.237	90.647	1803.5	47.405	56.888
1202.4	96.1	94.275	94.204	90.623	1804.4	47.403	56.886
1202.9	96.061	94.279	94.155	90.602	1805.4	47.412	56.882
1203.4	96.016	94.289	94.085	90.57	1806.4	47.413	56.884
1203.8	95.964	94.299	93.997	90.52	1807.3	47.402	56.882
1204.3	95.907	94.303	93.904	90.452	1808.3	47.388	56.862
1204.8	95.846	94.297	93.825	90.374	1809.3	47.38	56.862
1205.3	95.786	94.278	93.774	90.301	1810.2	47.389	56.864
1205.8	95.727	94.247	93.752	90.241	1811.2	47.371	56.84
1206.3	95.673	94.21	93.751	90.201	1812.2	47.361	56.83
1206.7	95.622	94.171	93.751	90.178	1813.1	47.341	56.822
1207.2	95.574	94.134	93.736	90.162	1814.1	47.339	56.824
1207.7	95.526	94.1	93.698	90.146	1815	47.348	56.825
1208.2	95.48	94.07	93.642	90.123	1816	47.356	56.836
1208.7	95.433	94.043	93.579	90.09	1817	47.355	56.829
1209.1	95.385	94.021	93.52	90.045	1817.9	47.329	56.783
1209.6	95.335	94.004	93.467	89.987	1818.9	47.304	56.761
1210.1	95.282	93.993	93.417	89.917	1819.9	47.288	56.759
1210.6	95.228	93.985	93.361	89.84	1820.8	47.281	56.752
1211.1	95.179	93.976	93.294	89.763	1821.8	47.273	56.755
1211.6	95.142	93.96	93.218	89.693	1822.8	47.262	56.752
1212	95.122	93.939	93.143	89.637	1823.7	47.266	56.75
1212.5	95.12	93.915	93.076	89.593	1824.7	47.253	56.761
1213	95.13	93.899	93.022	89.558	1825.7	47.243	56.704
1213.5	95.145	93.898	92.98	89.525	1826.6	47.225	56.691
1214	95.157	93.922	92.944	89.496	1827.6	47.215	56.695
1214.5	95.167	93.975	92.911	89.475	1828.5	47.203	56.713
1214.9	95.179	94.055	92.885	89.468	1829.5	47.185	56.713
1215.4	95.198	94.152	92.871	89.478	1830.5	47.176	56.66
1215.9	95.224	94.248	92.872	89.502	1831.4	47.179	56.666
1216.4	95.251	94.321	92.886	89.53	1832.4	47.165	56.656
1216.9	95.269	94.35	92.905	89.551	1833.4	47.165	56.643
1217.3	95.27	94.324	92.915	89.561	1834.3	47.163	56.64
1217.8	95.253	94.247	92.912	89.558	1835.3	47.152	56.641
1218.3	95.223	94.134	92.899	89.548	1836.3	47.145	56.635
1218.8	95.192	94.002	92.886	89.536	1837.2	47.125	56.603
1219.3	95.17	93.867	92.885	89.528	1838.2	47.113	56.573
1219.8	95.163	93.741	92.903	89.523	1839.2	47.104	56.567
1220.2	95.167	93.629	92.936	89.523	1840.1	47.093	56.56
1220.7	95.177	93.535	92.975	89.527	1841.1	47.089	56.561
1221.2	95.184	93.465	93.009	89.531	1842.1	47.106	56.563
1221.7	95.185	93.422	93.034	89.534	1843	47.092	56.578
1222.2	95.176	93.407	93.048	89.531	1844	47.054	56.589
1222.6	95.163	93.418	93.055	89.518	1844.9	47.025	56.482
1223.1	95.15	93.444	93.056	89.494	1845.9	47.014	56.452
1223.6	95.144	93.476	93.053	89.462	1846.9	47.009	56.468
1224.1	95.15	93.506	93.047	89.432	1847.8	47.003	56.463
1224.6	95.17	93.529	93.044	89.411	1848.8	46.993	56.425
1225.1	95.204	93.545	93.053	89.407	1849.8	46.986	56.435
1225.5	95.247	93.552	93.078	89.415	1850.7	46.971	56.433
1226	95.29	93.553	93.117	89.429	1851.7	46.973	56.444
1226.5	95.325	93.547	93.157	89.438	1852.7	46.943	56.412
1227	95.345	93.538	93.189	89.433	1853.6	46.902	56.374
1227.5	95.349	93.525	93.207	89.415	1854.6	46.903	56.347
1228	95.339	93.511	93.214	89.387	1855.6	46.897	56.336
1228.4	95.323	93.494	93.218	89.356	1856.5	46.864	56.324
1228.9	95.309	93.474	93.229	89.325	1857.5	46.854	56.331
1229.4	95.302	93.45	93.247	89.296	1858.4	46.845	56.313
1229.9	95.305	93.425	93.267	89.265	1859.4	46.837	56.284
1230.4	95.317	93.4	93.282	89.233	1860.4	46.812	56.264
1230.8	95.337	93.376	93.287	89.201	1861.3	46.79	56.236
1231.3	95.363	93.351	93.284	89.171	1862.3	46.788	56.235
1231.8	95.392	93.323	93.279	89.143	1863.3	46.783	56.242
1232.3	95.42	93.285	93.276	89.115	1864.2	46.774	56.218
1232.8	95.44	93.232	93.277	89.083	1865.2	46.76	56.205
1233.3	95.447	93.161	93.279	89.045	1866.2	46.747	56.198
1233.7	95.436	93.074	93.278	89.003	1867.1	46.711	56.183
1234.2	95.409	92.979	93.274	88.961	1868.1	46.684	56.147
1234.7	95.374	92.884	93.266	88.926	1869.1	46.654	56.125
1235.2	95.338	92.799	93.257	88.9	1870	46.628	56.079
1235.7	95.312	92.727	93.245	88.879	1871	46.622	56.067
1236.1	95.298	92.668	93.232	88.859	1871.9	46.603	56.08
1236.6	95.294	92.613	93.215	88.833	1872.9	46.601	56.067
1237.1	95.295	92.558	93.196	88.8	1873.9	46.61	56.059
1237.6	95.299	92.499	93.176	88.761	1874.8	46.585	56.055
1238.1	95.302	92.441	93.156	88.718	1875.8	46.584	56.07
1238.6	95.309	92.39	93.136	88.676	1876.8	46.597	56.073
1239	95.321	92.351	93.115	88.635	1877.7	46.607	56.071
1239.5	95.34	92.325	93.094	88.598	1878.7	46.601	56.076
1240	95.365	92.306	93.076	88.566	1879.7	46.606	56.066
1240.5	95.389	92.288	93.061	88.54	1880.6	46.617	56.073
1241	95.407	92.266	93.051	88.519	1881.6	46.619	56.118
1241.5	95.416	92.236	93.042	88.499	1882.6	46.602	56.111
1241.9	95.413	92.199	93.026	88.474	1883.5	46.595	56.099
1242.4	95.399	92.158	93	88.439	1884.5	46.598	56.094
1242.9	95.376	92.117	92.96	88.396	1885.4	46.605	56.084
1243.4	95.35	92.08	92.91	88.349	1886.4	46.609	56.086
1243.9	95.329	92.053	92.862	88.305	1887.4	46.604	56.078
1244.3	95.321	92.037	92.821	88.271	1888.3	46.596	56.078
1244.8	95.33	92.033	92.79	88.248	1889.3	46.588	56.068
1245.3	95.353	92.035	92.767	88.232	1890.3	46.573	56.032
1245.8	95.386	92.038	92.742	88.218	1891.2	46.587	56.021
1246.3	95.418	92.035	92.709	88.2	1892.2	46.594	56.015
1246.8	95.442	92.024	92.667	88.179	1893.2	46.587	56.025
1247.2	95.456	92.006	92.618	88.155	1894.1	46.587	56.024
1247.7	95.461	91.984	92.57	88.132	1895.1	46.583	56.034
1248.2	95.464	91.963	92.528	88.112	1896.1	46.578	56.032
1248.7	95.467	91.945	92.498	88.097	1897	46.583	56.032
1249.2	95.471	91.929	92.478	88.086	1898	46.609	56.023
1249.6	95.476	91.918	92.464	88.075	1899	46.592	56.024
1250.1	95.477	91.911	92.453	88.062	1899.9	46.576	56.022
1250.6	95.477	91.909	92.44	88.044	1900.9	46.559	56.02
1251.1	95.476	91.908	92.422	88.022	1901.8	46.529	56.001
1251.6	95.477	91.903	92.397	87.997	1902.8	46.517	55.975
1252.1	95.483	91.89	92.366	87.974	1903.8	46.515	55.967
1252.5	95.492	91.87	92.331	87.954	1904.7	46.496	55.967
1253	95.501	91.846	92.295	87.94	1905.7	46.493	55.973
1253.5	95.504	91.826	92.262	87.928	1906.7	46.497	55.969
1254	95.501	91.816	92.235	87.915	1907.6	46.477	55.934
1254.5	95.491	91.815	92.217	87.899	1908.6	46.472	55.914
1254.9	95.478	91.818	92.207	87.878	1909.6	46.465	55.918
1255.4	95.466	91.819	92.203	87.852	1910.5	46.456	55.908
1255.9	95.459	91.811	92.199	87.823	1911.5	46.46	55.891
1256.4	95.457	91.793	92.186	87.792	1912.5	46.411	55.877
1256.9	95.458	91.768	92.159	87.758	1913.4	46.373	55.882
1257.4	95.457	91.741	92.113	87.72	1914.4	46.374	55.86
1257.8	95.449	91.719	92.055	87.677	1915.3	46.355	55.846
1258.3	95.431	91.703	91.993	87.632	1916.3	46.347	55.834
1258.8	95.406	91.696	91.938	87.589	1917.3	46.342	55.834
1259.3	95.377	91.692	91.898	87.552	1918.2	46.309	55.762
1259.8	95.351	91.689	91.873	87.524	1919.2	46.324	55.74
1260.3	95.333	91.679	91.862	87.509	1920.2	46.324	55.784
1260.7	95.325	91.661	91.858	87.506	1921.1	46.316	55.804
1261.2	95.325	91.635	91.857	87.512	1922.1	46.291	55.789
1261.7	95.326	91.602	91.854	87.522	1923.1	46.293	55.769
1262.2	95.323	91.567	91.846	87.529	1924	46.308	55.772
1262.7	95.312	91.535	91.823	87.522	1925	46.282	55.748
1263.1	95.29	91.506	91.78	87.492	1926	46.251	55.715
1263.6	95.258	91.483	91.715	87.439	1926.9	46.247	55.71
1264.1	95.219	91.464	91.632	87.367	1927.9	46.212	55.689
1264.6	95.176	91.446	91.546	87.289	1928.8	46.188	55.689
1265.1	95.132	91.428	91.47	87.217	1929.8	46.171	55.682
1265.6	95.09	91.407	91.415	87.162	1930.8	46.195	55.665
1266	95.055	91.385	91.381	87.124	1931.7	46.19	55.674
1266.5	95.029	91.363	91.364	87.098	1932.7	46.152	55.662
1267	95.011	91.346	91.356	87.077	1933.7	46.125	55.655
1267.5	95.002	91.338	91.349	87.056	1934.6	46.106	55.628
1268	94.998	91.339	91.339	87.033	1935.6	46.152	55.613
1268.4	94.995	91.348	91.324	87.007	1936.6	46.142	55.647
1268.9	94.99	91.359	91.301	86.978	1937.5	46.098	55.616
1269.4	94.977	91.367	91.269	86.948	1938.5	46.086	55.578
1269.9	94.957	91.365	91.228	86.916	1939.5	46.089	55.6
1270.4	94.933	91.351	91.181	86.884	1940.4	46.086	55.573
1270.9	94.908	91.325	91.133	86.853	1941.4	46.095	55.578
1271.3	94.892	91.293	91.089	86.826	1942.4	46.043	55.54
1271.8	94.888	91.26	91.053	86.805	1943.3	45.955	55.437
1272.3	94.9	91.231	91.027	86.792	1944.3	45.985	55.484
1272.8	94.92	91.208	91.012	86.784	1945.2	46.004	55.51
1273.3	94.938	91.189	91.006	86.782	1946.2	45.994	55.501
1273.8	94.946	91.17	91.004	86.778	1947.2	46.002	55.52
1274.2	94.937	91.148	90.998	86.768	1948.1	46.002	55.518
1274.7	94.913	91.123	90.982	86.745	1949.1	45.941	55.473
1275.2	94.879	91.099	90.952	86.706	1950.1	45.893	55.473
1275.7	94.841	91.076	90.908	86.652	1951	45.902	55.472
1276.2	94.804	91.056	90.854	86.59	1952	45.952	55.434
1276.6	94.768	91.039	90.797	86.528	1953	45.943	55.432
1277.1	94.732	91.02	90.743	86.476	1953.9	45.924	55.43
1277.6	94.698	90.996	90.694	86.436	1954.9	45.885	55.414
1278.1	94.671	90.966	90.651	86.409	1955.9	45.833	55.409
1278.6	94.654	90.933	90.615	86.388	1956.8	45.827	55.406
1279.1	94.646	90.901	90.586	86.367	1957.8	45.834	55.401
1279.5	94.647	90.873	90.565	86.341	1958.7	45.792	55.371
1280	94.649	90.853	90.55	86.309	1959.7	45.732	55.319
1280.5	94.649	90.838	90.537	86.272	1960.7	45.687	55.264
1281	94.645	90.827	90.522	86.234	1961.6	45.693	55.245
1281.5	94.636	90.814	90.503	86.196	1962.6	45.671	55.217
1281.9	94.623	90.795	90.48	86.158	1963.6	45.628	55.2
1282.4	94.607	90.77	90.454	86.117	1964.5	45.574	55.164
1282.9	94.587	90.739	90.427	86.071	1965.5	45.552	55.136
1283.4	94.567	90.71	90.4	86.02	1966.5	45.511	55.129
1283.9	94.549	90.687	90.374	85.969	1967.4	45.467	55.116
1284.4	94.536	90.674	90.349	85.925	1968.4	45.408	55.075
1284.8	94.525	90.67	90.326	85.891	1969.4	45.376	55.05
1285.3	94.51	90.668	90.304	85.869	1970.3	45.374	55.023
1285.8	94.485	90.658	90.283	85.851	1971.3	45.386	55.02
1286.3	94.448	90.632	90.257	85.829	1972.2	45.397	55.036
1286.8	94.4	90.588	90.223	85.793	1973.2	45.408	55.035
1287.3	94.349	90.532	90.178	85.737	1974.2	45.369	54.984
1287.7	94.302	90.475	90.123	85.663	1975.1	45.313	54.943
1288.2	94.264	90.428	90.061	85.579	1976.1	45.331	54.963
1288.7	94.238	90.398	89.995	85.494	1977.1	45.343	54.943
1289.2	94.223	90.384	89.927	85.416	1978	45.266	54.851
1289.7	94.214	90.378	89.857	85.347	1979	45.228	54.822
1290.1	94.209	90.371	89.782	85.285	1980	45.25	54.814
1290.6	94.2	90.355	89.706	85.226	1980.9	45.266	54.839
1291.1	94.183	90.328	89.633	85.166	1981.9	45.294	54.87
1291.6	94.156	90.295	89.57	85.1	1982.9	45.326	54.915
1292.1	94.122	90.262	89.516	85.026	1983.8	45.351	54.923
1292.6	94.086	90.235	89.47	84.949	1984.8	45.381	54.898
1293	94.052	90.215	89.425	84.872	1985.8	45.361	54.892
1293.5	94.02	90.198	89.375	84.8	1986.7	45.409	54.975
1294	93.988	90.175	89.318	84.735	1987.7	45.459	54.989
1294.5	93.948	90.137	89.251	84.677	1988.6	45.485	54.985
1295	93.901	90.084	89.175	84.62	1989.6	45.482	54.994
1295.4	93.848	90.018	89.088	84.555	1990.6	45.497	55.012
1295.9	93.798	89.952	88.986	84.477	1991.5	45.446	54.953
1296.4	93.757	89.897	88.871	84.382	1992.5	45.406	54.955
1296.9	93.726	89.858	88.747	84.275	1993.5	45.422	54.995
1297.4	93.7	89.836	88.622	84.16	1994.4	45.446	54.978
1297.9	93.674	89.821	88.504	84.046	1995.4	45.462	54.934
1298.3	93.64	89.807	88.396	83.934	1996.4	45.493	54.944
1298.8	93.597	89.785	88.295	83.827	1997.3	45.485	54.99
1299.3	93.547	89.756	88.193	83.721	1998.3	45.435	54.976
1299.8	93.494	89.721	88.087	83.613	1999.3	45.446	54.993
1300.3	93.438	89.683	87.973	83.503	2000.2	45.479	55.005
1300.8	93.381	89.642	87.852	83.39	2001.2	45.437	54.999
1301.2	93.318	89.598	87.727	83.276	2002.1	45.482	55.053
1301.7	93.248	89.548	87.601	83.163	2003.1	45.455	55
1302.2	93.167	89.491	87.473	83.055	2004.1	45.435	54.967
1302.7	93.079	89.43	87.345	82.951	2005	45.459	55.043
1303.2	92.987	89.37	87.216	82.849	2006	45.457	55.034
1303.6	92.895	89.317	87.086	82.747	2007	45.311	54.859
1304.1	92.808	89.275	86.955	82.641	2007.9	45.224	54.788
1304.6	92.725	89.243	86.819	82.527	2008.9	45.219	54.794
1305.1	92.643	89.215	86.676	82.406	2009.9	45.219	54.83
1305.6	92.559	89.184	86.525	82.279	2010.8	45.189	54.832
1306.1	92.47	89.144	86.368	82.15	2011.8	45.185	54.73
1306.5	92.376	89.09	86.212	82.022	2012.8	45.189	54.716
1307	92.282	89.026	86.061	81.894	2013.7	45.192	54.763
1307.5	92.191	88.956	85.917	81.767	2014.7	45.213	54.795
1308	92.107	88.887	85.775	81.638	2015.6	45.232	54.843
1308.5	92.03	88.825	85.627	81.505	2016.6	45.21	54.809
1308.9	91.956	88.771	85.466	81.366	2017.6	45.192	54.761
1309.4	91.88	88.725	85.289	81.22	2018.5	45.208	54.726
1309.9	91.795	88.686	85.098	81.07	2019.5	45.236	54.68
1310.4	91.699	88.65	84.9	80.918	2020.5	45.191	54.72
1310.9	91.593	88.615	84.701	80.768	2021.4	45.132	54.773
1311.4	91.481	88.583	84.507	80.626	2022.4	45.12	54.702
1311.8	91.37	88.553	84.321	80.494	2023.4	45.051	54.61
1312.3	91.262	88.526	84.145	80.375	2024.3	45.075	54.623
1312.8	91.159	88.5	83.979	80.267	2025.3	45.108	54.689
1313.3	91.058	88.469	83.822	80.168	2026.3	45.022	54.679
1313.8	90.957	88.431	83.672	80.072	2027.2	45.032	54.663
1314.3	90.855	88.384	83.527	79.971	2028.2	45.129	54.693
1314.7	90.753	88.331	83.382	79.862	2029.1	45.163	54.773
1315.2	90.653	88.278	83.236	79.742	2030.1	45.144	54.783
1315.7	90.558	88.228	83.088	79.613	2031.1	45.137	54.766
1316.2	90.465	88.181	82.94	79.477	2032	45.159	54.683
1316.7	90.371	88.135	82.795	79.341	2033	45.115	54.619
1317.1	90.272	88.084	82.656	79.211	2034	45.058	54.569
1317.6	90.166	88.023	82.521	79.089	2034.9	45.049	54.589
1318.1	90.057	87.956	82.391	78.976	2035.9	44.918	54.516
1318.6	89.95	87.889	82.26	78.872	2036.9	44.984	54.511
1319.1	89.851	87.83	82.128	78.775	2037.8	45.099	54.581
1319.6	89.764	87.782	81.992	78.683	2038.8	45.139	54.654
1320	89.687	87.742	81.852	78.593	2039.8	45.108	54.65
1320.5	89.618	87.704	81.709	78.499	2040.7	45.087	54.608
1321	89.552	87.662	81.562	78.399	2041.7	45.077	54.583
1321.5	89.485	87.615	81.412	78.29	2042.7	45.073	54.628
1322	89.415	87.567	81.261	78.173	2043.6	45.084	54.64
1322.4	89.338	87.523	81.11	78.047	2044.6	45.094	54.59
1322.9	89.255	87.482	80.956	77.916	2045.5	45.068	54.553
1323.4	89.166	87.441	80.799	77.781	2046.5	45.16	54.642
1323.9	89.073	87.394	80.634	77.647	2047.5	45.232	54.754
1324.4	88.978	87.335	80.46	77.516	2048.4	45.207	54.764
1324.9	88.881	87.267	80.279	77.387	2049.4	45.188	54.752
1325.3	88.778	87.196	80.096	77.259	2050.4	45.18	54.62
1325.8	88.668	87.13	79.915	77.126	2051.3	45.145	54.528
1326.3	88.549	87.073	79.736	76.982	2052.3	45.275	54.688
1326.8	88.422	87.025	79.553	76.824	2053.3	45.4	54.868
1327.3	88.288	86.976	79.358	76.651	2054.2	45.406	54.904
1327.7	88.15	86.921	79.141	76.465	2055.2	45.416	54.848
1328.2	88.009	86.854	78.897	76.27	2056.2	45.46	54.818
1328.7	87.865	86.778	78.627	76.066	2057.1	45.421	54.818
1329.2	87.713	86.698	78.337	75.852	2058.1	45.336	54.837
1329.7	87.552	86.616	78.036	75.627	2059	45.325	54.825
1330.2	87.375	86.531	77.732	75.392	2060	45.381	54.865
1330.6	87.181	86.44	77.43	75.153	2061	45.415	54.902
1331.1	86.97	86.338	77.128	74.916	2061.9	45.4	54.849
1331.6	86.747	86.224	76.821	74.686	2062.9	45.381	54.841
1332.1	86.518	86.102	76.501	74.461	2063.9	45.401	54.903
1332.6	86.289	85.979	76.163	74.239	2064.8	45.362	54.857
1333.1	86.065	85.862	75.808	74.012	2065.8	45.387	54.863
1333.5	85.843	85.752	75.441	73.777	2066.8	45.419	54.907
1334	85.616	85.647	75.066	73.532	2067.7	45.38	54.905
1334.5	85.375	85.541	74.685	73.278	2068.7	45.368	54.846
1335	85.116	85.43	74.292	73.013	2069.7	45.393	54.83
1335.5	84.837	85.313	73.882	72.739	2070.6	45.395	54.862
1335.9	84.54	85.193	73.458	72.454	2071.6	45.373	54.848
1336.4	84.233	85.074	73.029	72.162	2072.5	45.384	54.85
1336.9	83.923	84.96	72.608	71.862	2073.5	45.446	54.889
1337.4	83.61	84.846	72.196	71.553	2074.5	45.421	54.859
1337.9	83.287	84.726	71.774	71.227	2075.4	45.37	54.794
1338.4	82.944	84.589	71.312	70.876	2076.4	45.345	54.765
1338.8	82.574	84.432	70.782	70.496	2077.4	45.361	54.781
1339.3	82.179	84.26	70.181	70.103	2078.3	45.394	54.791
1339.8	81.772	84.084	69.552	69.73	2079.3	45.426	54.802
1340.3	81.372	83.919	68.961	69.408	2080.3	45.436	54.801
1340.8	80.989	83.77	68.446	69.139	2081.2	45.433	54.787
1341.2	80.616	83.635	67.997	68.9	2082.2	45.429	54.777
1341.7	80.241	83.506	67.576	68.659	2083.2	45.432	54.809
1342.2	79.847	83.374	67.145	68.392	2084.1	45.442	54.838
1342.7	79.426	83.237	66.677	68.088	2085.1	45.448	54.85
1343.2	78.979	83.091	66.162	67.75	2086.1	45.433	54.815
1343.7	78.512	82.938	65.605	67.392	2087	45.4	54.782
1344.1	78.035	82.777	65.025	67.03	2088	45.425	54.787
1344.6	77.552	82.609	64.437	66.677	2088.9	45.458	54.776
1345.1	77.061	82.435	63.851	66.335	2089.9	45.425	54.783
1345.6	76.556	82.257	63.269	65.996	2090.9	45.391	54.804
1346.1	76.032	82.079	62.686	65.653	2091.8	45.363	54.798
1346.6	75.489	81.902	62.099	65.303	2092.8	45.382	54.832
1347	74.93	81.725	61.505	64.946	2093.8	45.418	54.847
1347.5	74.354	81.543	60.898	64.588	2094.7	45.408	54.812
1348	73.761	81.353	60.273	64.229	2095.7	45.377	54.787
1348.5	73.148	81.151	59.628	63.874	2096.7	45.329	54.763
1349	72.521	80.94	58.967	63.523	2097.6	45.3	54.688
1349.4	71.887	80.724	58.304	63.18	2098.6	45.32	54.64
1349.9	71.255	80.507	57.647	62.84	2099.6	45.306	54.641
1350.4	70.628	80.293	57	62.501	2100.5	45.327	54.678
1350.9	70.001	80.081	56.353	62.154	2101.5	45.341	54.713
1351.4	69.366	79.872	55.702	61.8	2102.4	45.322	54.744
1351.9	68.719	79.668	55.048	61.445	2103.4	45.271	54.747
1352.3	68.061	79.465	54.399	61.099	2104.4	45.243	54.728
1352.8	67.387	79.259	53.758	60.765	2105.3	45.242	54.652
1353.3	66.692	79.047	53.119	60.438	2106.3	45.25	54.609
1353.8	65.971	78.826	52.468	60.107	2107.3	45.253	54.643
1354.3	65.229	78.601	51.796	59.765	2108.2	45.274	54.675
1354.7	64.481	78.382	51.114	59.416	2109.2	45.3	54.688
1355.2	63.749	78.18	50.445	59.077	2110.2	45.271	54.664
1355.7	63.041	77.994	49.805	58.761	2111.1	45.24	54.594
1356.2	62.347	77.815	49.188	58.47	2112.1	45.239	54.564
1356.7	61.646	77.63	48.575	58.195	2113.1	45.236	54.577
1357.2	60.923	77.434	47.951	57.927	2114	45.209	54.586
1357.6	60.184	77.231	47.318	57.662	2115	45.21	54.586
1358.1	59.449	77.034	46.692	57.403	2115.9	45.215	54.6
1358.6	58.735	76.855	46.088	57.151	2116.9	45.235	54.627
1359.1	58.05	76.699	45.506	56.906	2117.9	45.236	54.629
1359.6	57.387	76.56	44.938	56.663	2118.8	45.228	54.629
1360.1	56.739	76.432	44.378	56.417	2119.8	45.211	54.636
1360.5	56.106	76.305	43.829	56.17	2120.8	45.237	54.663
1361	55.49	76.177	43.305	55.924	2121.7	45.29	54.671
1361.5	54.889	76.044	42.807	55.68	2122.7	45.326	54.701
1362	54.296	75.909	42.325	55.439	2123.7	45.277	54.694
1362.5	53.702	75.775	41.839	55.209	2124.6	45.221	54.674
1362.9	53.12	75.654	41.348	55.01	2125.6	45.259	54.691
1363.4	52.574	75.551	40.875	54.864	2126.6	45.292	54.709
1363.9	52.083	75.462	40.449	54.773	2127.5	45.234	54.688
1364.4	51.643	75.368	40.072	54.719	2128.5	45.203	54.673
1364.9	51.224	75.247	39.729	54.68	2129.4	45.189	54.638
1365.4	50.797	75.079	39.405	54.639	2130.4	45.172	54.65
1365.8	50.34	74.857	39.092	54.588	2131.4	45.187	54.691
1366.3	49.85	74.588	38.792	54.528	2132.3	45.177	54.688
1366.8	49.334	74.295	38.511	54.465	2133.3	45.123	54.698
1367.3	48.81	74.002	38.251	54.406	2134.3	45.057	54.662
1367.8	48.294	73.733	38.009	54.357	2135.2	45.001	54.57
1368.2	47.802	73.501	37.783	54.325	2136.2	44.964	54.491
1368.7	47.352	73.313	37.58	54.317	2137.2	44.927	54.503
1369.2	46.963	73.175	37.411	54.336	2138.1	44.908	54.529
1369.7	46.643	73.094	37.286	54.382	2139.1	44.929	54.476
1370.2	46.394	73.073	37.201	54.45	2140.1	44.899	54.432
1370.7	46.212	73.112	37.142	54.531	2141	44.854	54.46
1371.1	46.094	73.202	37.099	54.614	2142	44.805	54.422
1371.6	46.04	73.335	37.065	54.694	2143	44.831	54.307
1372.1	46.054	73.501	37.042	54.767	2143.9	44.857	54.263
1372.6	46.144	73.704	37.043	54.841	2144.9	44.804	54.324
1373.1	46.317	73.96	37.084	54.93	2145.8	44.721	54.308
1373.6	46.579	74.294	37.188	55.058	2146.8	44.741	54.279
1374	46.928	74.719	37.363	55.246	2147.8	44.78	54.312
1374.5	47.35	75.223	37.593	55.49	2148.7	44.729	54.36
1375	47.821	75.762	37.837	55.76	2149.7	44.641	54.274
1375.5	48.322	76.3	38.068	56.026	2150.7	44.632	54.222
1376	48.848	76.824	38.281	56.278	2151.6	44.662	54.267
1376.4	49.408	77.343	38.492	56.522	2152.6	44.669	54.291
1376.9	50.014	77.876	38.719	56.767	2153.6	44.629	54.262
1377.4	50.672	78.44	38.98	57.023	2154.5	44.52	54.172
1377.9	51.378	79.037	39.283	57.293	2155.5	44.45	54.166
1378.4	52.112	79.66	39.623	57.576	2156.5	44.499	54.286
1378.9	52.854	80.294	39.986	57.868	2157.4	44.616	54.385
1379.3	53.589	80.924	40.361	58.169	2158.4	44.605	54.282
1379.8	54.314	81.541	40.743	58.48	2159.3	44.297	53.93
1380.3	55.028	82.134	41.134	58.8	2160.3	43.991	53.618
1380.8	55.731	82.693	41.537	59.127	2161.3	43.979	53.508
1381.3	56.412	83.208	41.953	59.457	2162.2	43.978	53.495
1381.7	57.061	83.672	42.382	59.787	2163.2	44.002	53.593
1382.2	57.672	84.087	42.824	60.122	2164.2	44.16	53.708
1382.7	58.248	84.464	43.28	60.47	2165.1	44.297	53.711
1383.2	58.796	84.812	43.743	60.837	2166.1	44.304	53.746
1383.7	59.317	85.135	44.202	61.215	2167.1	44.279	53.8
1384.2	59.807	85.428	44.636	61.582	2168	44.296	53.789
1384.6	60.256	85.684	45.031	61.918	2169	44.299	53.781
1385.1	60.655	85.894	45.388	62.208	2170	44.357	53.867
1385.6	61.012	86.06	45.731	62.461	2170.9	44.443	53.963
1386.1	61.348	86.188	46.106	62.708	2171.9	44.412	53.978
1386.6	61.696	86.293	46.571	63.001	2172.8	44.387	53.958
1387	62.085	86.386	47.147	63.386	2173.8	44.429	53.945
1387.5	62.512	86.474	47.776	63.846	2174.8	44.449	53.953
1388	62.944	86.554	48.354	64.309	2175.7	44.414	53.941
1388.5	63.351	86.618	48.834	64.717	2176.7	44.358	53.955
1389	63.725	86.665	49.244	65.071	2177.7	44.359	53.946
1389.5	64.081	86.703	49.638	65.398	2178.6	44.396	53.958
1389.9	64.439	86.739	50.062	65.732	2179.6	44.41	53.949
1390.4	64.812	86.785	50.53	66.086	2180.6	44.378	53.931
1390.9	65.197	86.844	51.024	66.449	2181.5	44.377	53.964
1391.4	65.579	86.915	51.505	66.792	2182.5	44.364	53.931
1391.9	65.946	86.99	51.94	67.091	2183.5	44.353	53.901
1392.4	66.294	87.06	52.331	67.343	2184.4	44.326	53.868
1392.8	66.636	87.121	52.704	67.567	2185.4	44.322	53.85
1393.3	66.993	87.177	53.108	67.799	2186.4	44.319	53.829
1393.8	67.395	87.24	53.605	68.09	2187.3	44.327	53.806
1394.3	67.865	87.327	54.244	68.491	2188.3	44.372	53.824
1394.8	68.398	87.447	55.004	69.004	2189.2	44.397	53.878
1395.2	68.954	87.589	55.775	69.55	2190.2	44.412	53.866
1395.7	69.479	87.729	56.446	70.034	2191.2	44.433	53.852
1396.2	69.95	87.848	56.996	70.426	2192.1	44.45	53.891
1396.7	70.372	87.938	57.469	70.751	2193.1	44.501	53.913
1397.2	70.773	88.002	57.928	71.055	2194.1	44.552	53.937
1397.7	71.19	88.049	58.447	71.39	2195	44.521	53.956
1398.1	71.666	88.094	59.105	71.806	2196	44.476	53.94
1398.6	72.221	88.157	59.936	72.322	2197	44.481	53.922
1399.1	72.832	88.248	60.867	72.886	2197.9	44.547	53.959
1399.6	73.439	88.364	61.755	73.413	2198.9	44.603	53.955
1400.1	74	88.488	62.522	73.863	2199.9	44.552	53.911
1400.5	74.514	88.603	63.189	74.259	2200.8	44.538	53.937
1401	75.001	88.701	63.818	74.638	2201.8	44.556	53.957
1401.5	75.478	88.777	64.446	75.022	2202.7	44.546	53.911
1402	75.945	88.832	65.079	75.402	2203.7	44.518	53.918
1402.5	76.389	88.865	65.701	75.758	2204.7	44.536	53.976
1403	76.805	88.884	66.3	76.074	2205.6	44.555	53.985
1403.4	77.206	88.896	66.893	76.357	2206.6	44.511	53.97
1403.9	77.624	88.914	67.522	76.643	2207.6	44.485	53.982
1404.4	78.088	88.949	68.23	76.977	2208.5	44.535	54.032
1404.9	78.596	89.002	69.003	77.372	2209.5	44.59	54.086
1405.4	79.108	89.063	69.761	77.788	2210.5	44.592	54.064
1405.9	79.573	89.116	70.423	78.163	2211.4	44.569	54.029
1406.3	79.97	89.149	70.973	78.466	2212.4	44.606	54.033
1406.8	80.312	89.158	71.447	78.705	2213.4	44.628	54.011
1407.3	80.62	89.151	71.886	78.899	2214.3	44.621	54.003
1407.8	80.911	89.138	72.312	79.066	2215.3	44.608	54.005
1408.3	81.186	89.129	72.721	79.21	2216.2	44.577	53.985
1408.7	81.433	89.126	73.098	79.327	2217.2	44.581	54.032
1409.2	81.641	89.126	73.429	79.413	2218.2	44.572	54.03
1409.7	81.805	89.117	73.713	79.471	2219.1	44.524	53.961
1410.2	81.933	89.091	73.954	79.506	2220.1	44.509	53.89
1410.7	82.034	89.045	74.159	79.523	2221.1	44.582	53.978
1411.2	82.115	88.984	74.325	79.527	2222	44.63	54.019
1411.6	82.176	88.918	74.446	79.516	2223	44.618	54.016
1412.1	82.213	88.855	74.516	79.485	2224	44.61	54.058
1412.6	82.22	88.796	74.534	79.432	2224.9	44.629	54.057
1413.1	82.192	88.739	74.503	79.352	2225.9	44.647	54.038
1413.6	82.13	88.677	74.428	79.245	2226.9	44.657	54.022
1414	82.032	88.607	74.311	79.108	2227.8	44.671	54.029
1414.5	81.891	88.524	74.149	78.934	2228.8	44.65	54.037
1415	81.697	88.425	73.934	78.716	2229.7	44.62	54.009
1415.5	81.444	88.309	73.657	78.449	2230.7	44.594	53.989
1416	81.139	88.18	73.323	78.14	2231.7	44.586	54.005
1416.5	80.805	88.044	72.952	77.81	2232.6	44.596	54.03
1416.9	80.463	87.909	72.565	77.482	2233.6	44.592	54.016
1417.4	80.112	87.773	72.163	77.16	2234.6	44.637	54.037
1417.9	79.715	87.622	71.697	76.812	2235.5	44.651	54.049
1418.4	79.206	87.43	71.056	76.371	2236.5	44.627	54.033
1418.9	78.545	87.186	70.141	75.783	2237.5	44.66	54.044
1419.4	77.804	86.922	69.057	75.122	2238.4	44.679	54.072
1419.8	77.14	86.696	68.079	74.556	2239.4	44.666	54.054
1420.3	76.628	86.531	67.339	74.144	2240.4	44.675	54.032
1420.8	76.226	86.408	66.766	73.831	2241.3	44.676	54.001
1421.3	75.852	86.294	66.25	73.545	2242.3	44.685	54.027
1421.8	75.437	86.165	65.709	73.232	2243.3	44.73	54.076
1422.2	74.926	86.002	65.069	72.852	2244.2	44.719	54.093
1422.7	74.28	85.797	64.26	72.367	2245.2	44.673	54.066
1423.2	73.497	85.554	63.235	71.768	2246.1	44.69	54.029
1423.7	72.633	85.295	62.051	71.109	2247.1	44.713	54.015
1424.2	71.783	85.05	60.872	70.496	2248.1	44.766	54.074
1424.7	71.017	84.835	59.84	70	2249	44.792	54.123
1425.1	70.331	84.645	58.962	69.603	2250	44.752	54.073
1425.6	69.683	84.465	58.161	69.251	2251	44.749	54.069
1426.1	69.03	84.286	57.364	68.895	2251.9	44.758	54.083
1426.6	68.357	84.103	56.543	68.518	2252.9	44.738	54.091
1427.1	67.678	83.921	55.713	68.128	2253.9	44.733	54.092
1427.5	67.018	83.745	54.91	67.739	2254.8	44.734	54.116
1428	66.387	83.572	54.155	67.362	2255.8	44.74	54.092
1428.5	65.768	83.387	53.426	66.988	2256.8	44.721	54.073
1429	65.121	83.174	52.675	66.605	2257.7	44.75	54.103
1429.5	64.426	82.928	51.874	66.214	2258.7	44.762	54.112
1430	63.715	82.669	51.068	65.852	2259.6	44.741	54.082
1430.4	63.057	82.434	50.349	65.562	2260.6	44.749	54.104
1430.9	62.499	82.245	49.767	65.356	2261.6	44.783	54.123
1431.4	62.034	82.1	49.302	65.206	2262.5	44.757	54.093
1431.9	61.616	81.983	48.897	65.08	2263.5	44.759	54.095
1432.4	61.209	81.882	48.512	64.958	2264.5	44.78	54.122
1432.9	60.81	81.798	48.147	64.842	2265.4	44.793	54.124
1433.3	60.449	81.739	47.826	64.745	2266.4	44.784	54.121
1433.8	60.158	81.714	47.572	64.675	2267.4	44.766	54.108
1434.3	59.944	81.718	47.38	64.624	2268.3	44.767	54.103
1434.8	59.786	81.74	47.223	64.573	2269.3	44.781	54.109
1435.3	59.654	81.779	47.076	64.5	2270.3	44.772	54.126
1435.7	59.54	81.853	46.932	64.397	2271.2	44.756	54.101
1436.2	59.483	82.011	46.832	64.299	2272.2	44.758	54.086
1436.7	59.558	82.291	46.847	64.289	2273.1	44.759	54.085
1437.2	59.78	82.654	46.975	64.401	2274.1	44.775	54.097
1437.7	60.089	83.03	47.141	64.575	2275.1	44.789	54.114
1438.2	60.432	83.393	47.308	64.756	2276	44.792	54.112
1438.6	60.8	83.757	47.486	64.933	2277	44.798	54.089
1439.1	61.207	84.143	47.694	65.113	2278	44.788	54.079
1439.6	61.662	84.562	47.948	65.301	2278.9	44.818	54.114
1440.1	62.161	85.013	48.25	65.503	2279.9	44.831	54.125
1440.6	62.686	85.484	48.595	65.718	2280.9	44.846	54.129
1441	63.218	85.963	48.972	65.949	2281.8	44.847	54.112
1441.5	63.742	86.439	49.376	66.198	2282.8	44.849	54.088
1442	64.253	86.907	49.805	66.465	2283.8	44.853	54.079
1442.5	64.745	87.36	50.259	66.749	2284.7	44.864	54.079
1443	65.218	87.788	50.742	67.046	2285.7	44.873	54.086
1443.5	65.674	88.186	51.26	67.357	2286.7	44.891	54.094
1443.9	66.117	88.555	51.819	67.684	2287.6	44.914	54.106
1444.4	66.548	88.894	52.407	68.021	2288.6	44.915	54.103
1444.9	66.963	89.202	52.999	68.352	2289.5	44.895	54.078
1445.4	67.349	89.477	53.569	68.658	2290.5	44.9	54.087
1445.9	67.703	89.72	54.105	68.93	2291.5	44.916	54.109
1446.4	68.039	89.941	54.638	69.186	2292.4	44.94	54.134
1446.8	68.395	90.161	55.238	69.471	2293.4	44.966	54.14
1447.3	68.814	90.4	55.986	69.853	2294.4	45.006	54.149
1447.8	69.317	90.66	56.891	70.362	2295.3	45.027	54.168
1448.3	69.868	90.918	57.831	70.942	2296.3	45.047	54.145
1448.8	70.404	91.142	58.658	71.487	2297.3	45.068	54.167
1449.2	70.891	91.321	59.331	71.944	2298.2	45.059	54.166
1449.7	71.337	91.466	59.906	72.33	2299.2	45.044	54.136
1450.2	71.774	91.595	60.472	72.691	2300.2	45.046	54.11
1450.7	72.231	91.721	61.101	73.07	2301.1	45.063	54.138
1451.2	72.726	91.851	61.827	73.495	2302.1	45.1	54.172
1451.7	73.253	91.979	62.632	73.961	2303	45.092	54.143
1452.1	73.791	92.097	63.447	74.434	2304	45.1	54.129
1452.6	74.314	92.197	64.196	74.869	2305	45.094	54.107
1453.1	74.804	92.279	64.847	75.241	2305.9	45.112	54.146
1453.6	75.254	92.347	65.408	75.546	2306.9	45.127	54.179
1454.1	75.662	92.405	65.906	75.796	2307.9	45.103	54.149
1454.5	76.037	92.455	66.372	76.004	2308.8	45.038	54.111
1455	76.396	92.494	66.84	76.191	2309.8	45.075	54.12
1455.5	76.768	92.516	67.354	76.393	2310.8	45.084	54.149
1456	77.198	92.512	67.977	76.666	2311.7	45.103	54.139
1456.5	77.723	92.487	68.773	77.089	2312.7	45.059	54.138
1457	78.337	92.466	69.751	77.708	2313.7	45.068	54.114
1457.4	78.976	92.488	70.794	78.45	2314.6	45.067	54.149
1457.9	79.585	92.559	71.743	79.16	2315.6	45.082	54.159
1458.4	80.157	92.658	72.531	79.759	2316.5	45.102	54.208
1458.9	80.697	92.756	73.171	80.244	2317.5	45.103	54.203
1459.4	81.203	92.841	73.697	80.638	2318.5	45.103	54.193
1459.8	81.671	92.907	74.146	80.967	2319.4	45.067	54.129
1460.3	82.103	92.951	74.558	81.252	2320.4	45.052	54.096
1460.8	82.505	92.975	74.962	81.511	2321.4	45.014	54.063
1461.3	82.884	92.981	75.371	81.754	2322.3	45.051	54.081
1461.8	83.239	92.973	75.775	81.978	2323.3	45.061	54.036
1462.3	83.562	92.955	76.152	82.176	2324.3	45.049	53.976
1462.7	83.847	92.932	76.486	82.346	2325.2	45.07	54.004
1463.2	84.101	92.907	76.788	82.501	2326.2	45.155	54.101
1463.7	84.346	92.881	77.103	82.681	2327.2	45.187	54.187
1464.2	84.619	92.861	77.5	82.944	2328.1	45.236	54.279
1464.7	84.946	92.852	78.01	83.318	2329.1	45.21	54.277
1465.2	85.307	92.858	78.545	83.731	2330	45.188	54.251
1465.6	85.648	92.875	78.978	84.071	2331	45.164	54.257
1466.1	85.937	92.89	79.278	84.3	2332	45.185	54.268
1466.6	86.177	92.892	79.5	84.457	2332.9	45.207	54.276
1467.1	86.386	92.878	79.705	84.592	2333.9	45.211	54.296
1467.6	86.58	92.849	79.928	84.732	2334.9	45.213	54.323
1468	86.764	92.812	80.177	84.884	2335.8	45.232	54.332
1468.5	86.938	92.776	80.432	85.03	2336.8	45.188	54.34
1469	87.098	92.749	80.665	85.149	2337.8	45.163	54.336
1469.5	87.241	92.731	80.858	85.222	2338.7	45.13	54.334
1470	87.363	92.717	81.007	85.244	2339.7	45.127	54.316
1470.5	87.462	92.696	81.117	85.215	2340.7	45.141	54.314
1470.9	87.535	92.657	81.201	85.145	2341.6	45.17	54.333
1471.4	87.587	92.592	81.285	85.063	2342.6	45.148	54.335
1471.9	87.647	92.504	81.424	85.059	2343.6	45.138	54.355
1472.4	87.763	92.419	81.675	85.259	2344.5	45.175	54.344
1472.9	87.953	92.373	81.99	85.631	2345.5	45.183	54.276
1473.3	88.169	92.371	82.246	85.969	2346.4	45.203	54.23
1473.8	88.358	92.393	82.408	86.174	2347.4	45.275	54.233
1474.3	88.504	92.417	82.513	86.278	2348.4	45.341	54.247
1474.8	88.613	92.432	82.603	86.332	2349.3	45.358	54.259
1475.3	88.704	92.431	82.71	86.381	2350.3	45.308	54.273
1475.8	88.794	92.411	82.856	86.458	2351.3	45.265	54.283
1476.2	88.896	92.374	83.04	86.573	2352.2	45.235	54.292
1476.7	89.009	92.33	83.232	86.706	2353.2	45.161	54.306
1477.2	89.124	92.289	83.402	86.821	2354.2	45.062	54.296
1477.7	89.23	92.255	83.541	86.903	2355.1	45.017	54.268
1478.2	89.323	92.225	83.656	86.952	2356.1	44.996	54.243
1478.7	89.404	92.196	83.756	86.976	2357.1	44.96	54.279
1479.1	89.47	92.16	83.843	86.978	2358	44.972	54.352
1479.6	89.523	92.114	83.921	86.963	2359	44.982	54.349
1480.1	89.565	92.059	83.993	86.935	2359.9	44.942	54.32
1480.6	89.604	92.001	84.067	86.908	2360.9	44.856	54.307
1481.1	89.648	91.953	84.152	86.895	2361.9	44.81	54.252
1481.5	89.704	91.922	84.25	86.902	2362.8	44.87	54.301
1482	89.769	91.908	84.353	86.924	2363.8	44.916	54.337
1482.5	89.835	91.902	84.452	86.949	2364.8	44.963	54.379
1483	89.89	91.89	84.541	86.962	2365.7	44.89	54.329
1483.5	89.926	91.858	84.617	86.954	2366.7	44.899	54.296
1484	89.94	91.804	84.678	86.919	2367.7	44.981	54.38
1484.4	89.934	91.732	84.72	86.855	2368.6	44.959	54.406
1484.9	89.912	91.653	84.74	86.765	2369.6	44.976	54.387
1485.4	89.88	91.574	84.735	86.655	2370.6	45.068	54.41
1485.9	89.84	91.499	84.709	86.53	2371.5	45.043	54.387
1486.4	89.796	91.429	84.671	86.4	2372.5	44.984	54.326
1486.8	89.748	91.364	84.631	86.276	2373.4	44.969	54.279
1487.3	89.7	91.303	84.598	86.164	2374.4	45	54.28
1487.8	89.652	91.249	84.57	86.062	2375.4	45.03	54.33
1488.3	89.6	91.194	84.537	85.958	2376.3	45.051	54.341
1488.8	89.54	91.128	84.492	85.842	2377.3	45.104	54.334
1489.3	89.47	91.039	84.435	85.717	2378.3	45.137	54.321
1489.7	89.402	90.928	84.382	85.617	2379.2	45.121	54.296
1490.2	89.362	90.816	84.363	85.582	2380.2	45.118	54.278
1490.7	89.362	90.731	84.379	85.602	2381.2	45.162	54.308
1491.2	89.385	90.678	84.399	85.614	2382.1	45.198	54.347
1491.7	89.402	90.637	84.393	85.578	2383.1	45.194	54.366
1492.2	89.395	90.591	84.348	85.482	2384.1	45.195	54.366
1492.6	89.356	90.532	84.266	85.334	2385	45.181	54.365
1493.1	89.29	90.465	84.156	85.151	2386	45.176	54.38
1493.6	89.206	90.397	84.029	84.948	2387	45.19	54.383
1494.1	89.107	90.332	83.894	84.729	2387.9	45.199	54.382
1494.6	88.986	90.262	83.743	84.484	2388.9	45.185	54.394
1495	88.83	90.171	83.558	84.189	2389.8	45.18	54.4
1495.5	88.629	90.043	83.318	83.835	2390.8	45.18	54.38
1496	88.402	89.887	83.033	83.467	2391.8	45.17	54.393
1496.5	88.194	89.736	82.759	83.172	2392.7	45.158	54.406
1497	88.037	89.622	82.533	82.985	2393.7	45.131	54.367
1497.5	87.922	89.541	82.334	82.857	2394.7	45.135	54.353
1497.9	87.819	89.471	82.114	82.711	2395.6	45.133	54.379
1498.4	87.705	89.39	81.847	82.511	2396.6	45.126	54.391
1498.9	87.576	89.293	81.554	82.277	2397.6	45.134	54.376
1499.4	87.442	89.193	81.277	82.056	2398.5	45.143	54.366
1499.9	87.31	89.102	81.036	81.876	2399.5	45.148	54.363
1500.3	87.174	89.021	80.807	81.719	2400.5	45.15	54.359
1500.8	87.02	88.941	80.55	81.548	2401.4	45.155	54.372
1501.3	86.838	88.852	80.24	81.334	2402.4	45.139	54.369
1501.8	86.63	88.752	79.884	81.07	2403.3	45.127	54.372
1502.3	86.41	88.647	79.516	80.776	2404.3	45.118	54.371
1502.8	86.195	88.545	79.175	80.483	2405.3	45.106	54.349
1503.2	85.99	88.45	78.878	80.207	2406.2	45.115	54.341
1503.7	85.789	88.356	78.616	79.943	2407.2	45.132	54.347
1504.2	85.572	88.25	78.364	79.675	2408.2	45.12	54.318
1504.7	85.306	88.112	78.086	79.372	2409.1	45.098	54.311
1505.2	84.936	87.913	77.707	78.977	2410.1	45.11	54.347
1505.7	84.392	87.626	77.054	78.383	2411.1	45.119	54.339
1506.1	83.671	87.279	75.867	77.473	2412	45.081	54.305
1506.6	82.998	87.013	74.37	76.498	2413	45.077	54.288
1507.1	82.613	86.924	73.47	76.002	2414	45.084	54.291
1507.6	82.435	86.932	73.095	75.813	2414.9	45.071	54.275
1508.1	82.29	86.938	72.743	75.612	2415.9	45.065	54.243
1508.5	82.101	86.911	72.281	75.351	2416.8	45.066	54.249
1509	81.871	86.86	71.767	75.073	2417.8	45.048	54.262
1509.5	81.625	86.798	71.266	74.812	2418.8	45.045	54.249
1510	81.371	86.734	70.796	74.568	2419.7	45.06	54.262
1510.5	81.098	86.664	70.324	74.315	2420.7	45.053	54.278
1511	80.778	86.58	69.789	74.018	2421.7	45.04	54.263
1511.4	80.388	86.474	69.145	73.657	2422.6	45.018	54.234
1511.9	79.931	86.348	68.397	73.239	2423.6	45.005	54.223
1512.4	79.443	86.213	67.61	72.811	2424.6	44.996	54.233
1512.9	78.968	86.085	66.865	72.42	2425.5	45.001	54.245
1513.4	78.526	85.973	66.2	72.084	2426.5	45	54.238
1513.8	78.11	85.871	65.598	71.787	2427.5	45.003	54.22
1514.3	77.696	85.771	65.026	71.505	2428.4	44.987	54.204
1514.8	77.261	85.66	64.457	71.215	2429.4	44.964	54.18
1515.3	76.776	85.529	63.849	70.889	2430.3	44.944	54.169
1515.8	76.197	85.37	63.106	70.474	2431.3	44.947	54.16
1516.3	75.492	85.184	62.067	69.903	2432.3	44.971	54.171
1516.7	74.704	85.002	60.714	69.212	2433.2	44.975	54.162
1517.2	73.989	84.868	59.403	68.612	2434.2	44.949	54.14
1517.7	73.469	84.796	58.472	68.246	2435.2	44.921	54.122
1518.2	73.129	84.765	57.896	68.06	2436.1	44.885	54.135
1518.7	72.88	84.743	57.508	67.954	2437.1	44.854	54.147
1519.1	72.635	84.707	57.176	67.855	2438.1	44.916	54.155
1519.6	72.313	84.635	56.794	67.701	2439	44.948	54.118
1520.1	71.828	84.505	56.228	67.405	2440	44.924	54.098
1520.6	71.098	84.3	55.257	66.83	2441	44.905	54.115
1521.1	70.158	84.054	53.741	65.946	2441.9	44.897	54.116
1521.6	69.273	83.862	52.197	65.179	2442.9	44.889	54.077
1522	68.672	83.775	51.279	64.893	2443.9	44.854	54.05
1522.5	68.307	83.75	50.817	64.874	2444.8	44.84	54.029
1523	68.036	83.736	50.489	64.888	2445.8	44.852	54.039
1523.5	67.771	83.708	50.157	64.857	2446.7	44.852	54.07
1524	67.463	83.66	49.763	64.763	2447.7	44.862	54.083
1524.5	67.083	83.592	49.268	64.595	2448.7	44.871	54.068
1524.9	66.624	83.51	48.657	64.359	2449.6	44.878	54.078
1525.4	66.126	83.423	47.984	64.091	2450.6	44.844	54.046
1525.9	65.654	83.34	47.356	63.846	2451.6	44.829	54
1526.4	65.252	83.264	46.84	63.654	2452.5	44.828	53.999
1526.9	64.909	83.19	46.413	63.504	2453.5	44.831	54.01
1527.3	64.584	83.116	46.004	63.366	2454.5	44.857	54.043
1527.8	64.25	83.041	45.567	63.23	2455.4	44.867	54.061
1528.3	63.914	82.973	45.122	63.109	2456.4	44.841	54.046
1528.8	63.603	82.916	44.726	63.027	2457.4	44.839	54.036
1529.3	63.335	82.87	44.407	62.989	2458.3	44.84	54.04
1529.8	63.102	82.828	44.149	62.98	2459.3	44.846	54.055
1530.2	62.887	82.786	43.917	62.977	2460.2	44.814	54.025
1530.7	62.673	82.74	43.686	62.96	2461.2	44.804	54.002
1531.2	62.457	82.691	43.447	62.917	2462.2	44.811	54.01
1531.7	62.236	82.635	43.204	62.831	2463.1	44.786	53.999
1532.2	62	82.56	42.96	62.686	2464.1	44.79	53.989
1532.6	61.727	82.447	42.709	62.473	2465.1	44.778	53.972
1533.1	61.405	82.293	42.442	62.233	2466	44.761	53.953
1533.6	61.078	82.128	42.192	62.08	2467	44.768	53.962
1534.1	60.82	82.004	42.022	62.093	2468	44.769	53.964
1534.6	60.668	81.938	41.942	62.229	2468.9	44.755	53.938
1535.1	60.595	81.912	41.915	62.4	2469.9	44.725	53.916
1535.5	60.558	81.899	41.901	62.556	2470.9	44.739	53.915
1536	60.532	81.884	41.877	62.68	2471.8	44.737	53.931
1536.5	60.503	81.866	41.835	62.765	2472.8	44.743	53.92
1537	60.467	81.845	41.776	62.815	2473.7	44.735	53.864
1537.5	60.413	81.82	41.703	62.828	2474.7	44.698	53.856
1538	60.313	81.78	41.621	62.802	2475.7	44.678	53.881
1538.4	60.113	81.687	41.536	62.725	2476.6	44.699	53.898
1538.9	59.763	81.49	41.473	62.591	2477.6	44.706	53.882
1539.4	59.334	81.187	41.486	62.455	2478.6	44.687	53.875
1539.9	59.037	80.889	41.583	62.437	2479.5	44.689	53.892
1540.4	58.96	80.686	41.683	62.532	2480.5	44.687	53.873
1540.8	59.006	80.549	41.757	62.66	2481.5	44.673	53.847
1541.3	59.073	80.424	41.825	62.802	2482.4	44.653	53.855
1541.8	59.121	80.294	41.9	62.962	2483.4	44.642	53.835
1542.3	59.149	80.175	41.975	63.124	2484.4	44.637	53.811
1542.8	59.166	80.083	42.038	63.266	2485.3	44.63	53.832
1543.3	59.174	80.014	42.085	63.381	2486.3	44.621	53.823
1543.7	59.17	79.944	42.133	63.489	2487.3	44.622	53.804
1544.2	59.155	79.842	42.216	63.632	2488.2	44.648	53.824
1544.7	59.145	79.693	42.366	63.854	2489.2	44.651	53.831
1545.2	59.166	79.516	42.581	64.153	2490.1	44.631	53.809
1545.7	59.234	79.351	42.817	64.473	2491.1	44.619	53.795
1546.1	59.338	79.228	43.026	64.758	2492.1	44.64	53.793
1546.6	59.452	79.147	43.194	64.988	2493	44.647	53.799
1547.1	59.556	79.092	43.33	65.169	2494	44.652	53.807
1547.6	59.638	79.042	43.451	65.312	2495	44.638	53.804
1548.1	59.695	78.979	43.575	65.423	2495.9	44.634	53.807
1548.6	59.73	78.884	43.726	65.507	2496.9	44.631	53.798
1549	59.752	78.742	43.945	65.581	2497.9	44.617	53.77
1549.5	59.784	78.554	44.271	65.683	2498.8	44.604	53.747
1550	59.849	78.357	44.692	65.854	2499.8	44.594	53.749
1550.5	59.953	78.204	45.119	66.088	2500.8	44.577	53.737
1551	60.079	78.123	45.467	66.329	2501.7	44.575	53.736
1551.5	60.203	78.104	45.722	66.535	2502.7	44.571	53.717
1551.9	60.31	78.114	45.911	66.695	2503.6	44.571	53.704
1552.4	60.395	78.123	46.075	66.818	2504.6	44.583	53.728
1552.9	60.464	78.107	46.271	66.928	2505.6	44.594	53.768
1553.4	60.533	78.051	46.58	67.064	2506.5	44.603	53.777
1553.9	60.627	77.966	47.074	67.271	2507.5	44.575	53.735
1554.3	60.767	77.897	47.694	67.547	2508.5	44.542	53.706
1554.8	60.937	77.886	48.243	67.811	2509.4	44.529	53.718
1555.3	61.109	77.932	48.607	67.998	2510.4	44.526	53.734
1555.8	61.264	78.008	48.821	68.107	2511.4	44.544	53.736
1556.3	61.401	78.09	48.954	68.159	2512.3	44.558	53.72
1556.8	61.523	78.168	49.055	68.165	2513.3	44.539	53.716
1557.2	61.631	78.234	49.152	68.121	2514.3	44.524	53.724
1557.7	61.723	78.281	49.282	67.999	2515.2	44.516	53.698
1558.2	61.822	78.316	49.614	67.807	2516.2	44.5	53.674
1558.7	62.036	78.4	50.771	68.003	2517.1	44.475	53.654
1559.2	62.477	78.622	52.463	69.137	2518.1	44.473	53.629
1559.6	63.019	78.929	53.331	70.063	2519.1	44.46	53.615
1560.1	63.508	79.227	53.79	70.58	2520	44.449	53.644
1560.6	63.916	79.488	54.158	70.932	2521	44.486	53.661
1561.1	64.265	79.72	54.49	71.212	2522	44.485	53.645
1561.6	64.579	79.934	54.801	71.449	2522.9	44.462	53.646
1562.1	64.878	80.14	55.105	71.659	2523.9	44.466	53.657
1562.5	65.179	80.346	55.42	71.853	2524.9	44.454	53.642
1563	65.495	80.561	55.767	72.04	2525.8	44.435	53.643
1563.5	65.84	80.795	56.178	72.238	2526.8	44.433	53.616
[truncated: 5,054 more rows]
